# Supplementary material for: Regulation of Long Noncoding RNAs Responsive to Phytoplasma Infection in Paulownia tomentosa
Source: Int J Genomics. 2018 Feb 21;2018:3174352. doi: 10.1155/2018/3174352 (PMC5841072; doi:10.1155/2018/3174352)
Supplement: Supplementary 6 — Table S3: conservation of Paulownia tomentosa lncRNAs. [file 3174352.f6.xlsx]

## Sheet: sheet 1
Table S3 Conservation of Paulownia tomentosa lncRNAs
Query_id	Query_length	Subject_id	Identity	Gap	Align_length	Score	E_value	coverage
TCONS_00027906	441	CNT0000133_glycine	0.91	0	46	60	2e-08	0.104308
TCONS_00029061	2011	CNT0000355_glycine	0.92	0	165	216	7e-55	0.0820487
TCONS_00034692	2784	CNT0000395_glycine	1	0	36	71.9	3e-11	0.012931
TCONS_00007910	3927	CNT0000430_glycine	1	0	32	63.9	1e-08	0.00814871
TCONS_00000260	3047	CNT0000463_glycine	0.8	0	157	65.9	2e-09	0.0515261
TCONS_00031874	562	CNT0000589_glycine	1	0	52	103	2e-21	0.0925267
TCONS_00019806	815	CNT0000592_glycine	0.97	0	43	77.8	2e-13	0.0527607
TCONS_00019828	1626	CNT0000592_glycine	0.97	0	43	77.8	3e-13	0.0264453
TCONS_00019829	1889	CNT0000592_glycine	0.97	0	43	77.8	4e-13	0.0227634
TCONS_00034513	2127	CNT0000592_glycine	0.97	0	43	77.8	4e-13	0.0202163
TCONS_00032984	572	CNT0000758_glycine	0.87	0	56	56	4e-07	0.0979021
TCONS_00004649	801	CNT0000865_glycine	0.91	0	45	58	1e-07	0.0561798
TCONS_00019579	17625	CNT0000865_glycine	1	0	29	58	3e-06	0.00164539
TCONS_00020915	2009	CNT0000968_glycine	0.91	0	47	61.9	2e-08	0.0233947
TCONS_00014603	1343	CNT0001233_glycine	1	0	31	61.9	2e-08	0.0230827
TCONS_00022779	585	CNT0001460_glycine	0.88	0	96	103	2e-21	0.164103
TCONS_00025862	464	CNT0001460_glycine	0.87	0	104	103	2e-21	0.224138
TCONS_00001960	288	CNT0001475_glycine	0.82	0	102	60	1e-08	0.354167
TCONS_00023878	271	CNT0001514_glycine	0.9	0	42	52	3e-06	0.154982
TCONS_00033052	648	CNT0001714_glycine	0.9	0	64	79.8	3e-14	0.0987654
TCONS_00002104	2294	CNT0001771_glycine	0.97	0	38	67.9	4e-10	0.016565
TCONS_00022606	844	CNT0002049_glycine	0.84	0	76	56	6e-07	0.0900474
TCONS_00022607	3065	CNT0002049_glycine	0.84	0	76	56	2e-06	0.0247961
TCONS_00032702	4055	CNT0002101_glycine	0.92	0	50	67.9	8e-10	0.0123305
TCONS_00032703	4672	CNT0002101_glycine	0.92	0	50	67.9	9e-10	0.0107021
TCONS_00013406	3270	CNT0002116_glycine	0.92	0	40	56	2e-06	0.0122324
TCONS_00026963	1695	CNT0002167_glycine	0.87	0	58	60	8e-08	0.0342183
TCONS_00019273	781	CNT0002174_glycine	0.81	0	178	91.7	1e-17	0.227913
TCONS_00034011	750	CNT0002206_glycine	0.86	0	106	99.6	4e-20	0.141333
TCONS_00015223	476	CNT0002248_glycine	0.92	0	39	54	1e-06	0.0819328
TCONS_00020597	412	CNT0002248_glycine	0.88	0	100	103	1e-21	0.242718
TCONS_00033060	857	CNT0002375_glycine	0.85	0	87	69.9	4e-11	0.101517
TCONS_00016859	2445	CNT0002450_glycine	0.86	0	75	69.9	1e-10	0.0306748
TCONS_00018893	483	CNT0002460_glycine	0.86	0	69	65.9	3e-10	0.142857
TCONS_00013043	2672	CNT0002871_glycine	1	0	46	91.7	3e-17	0.0172156
TCONS_00017319	1019	CNT0002951_glycine	0.96	0	31	54	3e-06	0.030422
TCONS_00011190	535	CNT0003180_vitis	0.85	0	96	79.8	3e-14	0.179439
TCONS_00010593	2419	CNT0003348_vitis	0.85	0	137	113	8e-24	0.056635
TCONS_00010780	705	CNT0003348_vitis	1	0	26	52	8e-06	0.0368794
TCONS_00013936	2167	CNT0003384_vitis	0.9	0	50	60	1e-07	0.0230734
TCONS_00005759	239	CNT0003400_vitis	0.91	0	108	143	9e-34	0.451883
TCONS_00013434	350	CNT0003400_vitis	0.9	0	121	153	1e-36	0.345714
TCONS_00013435	562	CNT0003400_vitis	0.92	0	96	135	5e-31	0.170819
TCONS_00013437	253	CNT0003400_vitis	0.9	0	99	125	2e-28	0.391304
TCONS_00013438	635	CNT0003400_vitis	0.91	0	98	131	9e-30	0.154331
TCONS_00030070	720	CNT0003400_vitis	0.91	0	137	184	8e-46	0.190278
TCONS_00014272	2927	CNT0003455_vitis	0.84	0	113	89.7	1e-16	0.0386061
TCONS_00001984	3787	CNT0003478_vitis	0.97	0	42	75.8	3e-12	0.0110906
TCONS_00001985	3508	CNT0003478_vitis	0.97	0	42	75.8	3e-12	0.0119726
TCONS_00006552	3600	CNT0003478_vitis	0.92	0	40	56	3e-06	0.0111111
TCONS_00022658	1760	CNT0003478_vitis	0.85	0	71	61.9	2e-08	0.0403409
TCONS_00025112	1047	CNT0003487_vitis	1	0	28	56	7e-07	0.0267431
TCONS_00013436	559	CNT0003512_vitis	0.84	0	112	87.7	1e-16	0.200358
TCONS_00030069	279	CNT0003512_vitis	0.84	0.01	191	133	1e-30	0.684588
TCONS_00002749	1313	CNT0003522_vitis	0.92	0	39	54	4e-06	0.029703
TCONS_00000730	1694	CNT0003528_vitis	0.95	0.02	42	60	8e-08	0.0247934
TCONS_00032993	1547	CNT0003599_vitis	1	0	74	147	4e-34	0.0478345
TCONS_00032994	1923	CNT0003599_vitis	1	0	74	147	5e-34	0.0384815
TCONS_00029304	763	CNT0003606_vitis	0.9	0	75	93.7	2e-18	0.0982962
TCONS_00004931	1040	CNT0003623_vitis	0.97	0	108	190	2e-47	0.103846
TCONS_00004238	934	CNT0003700_vitis	0.98	0	83	157	2e-37	0.0888651
TCONS_00016242	1102	CNT0003834_vitis	1	0	34	67.9	2e-10	0.030853
TCONS_00004946	3195	CNT0003879_vitis	0.89	0	157	176	9e-43	0.0491393
TCONS_00005549	3778	CNT0003883_vitis	1	0	31	61.9	4e-08	0.0082054
TCONS_00005550	2150	CNT0003883_vitis	1	0	31	61.9	2e-08	0.0144186
TCONS_00011517	2621	CNT0003883_vitis	1	0	30	60	1e-07	0.011446
TCONS_00034440	3974	CNT0003883_vitis	0.95	0	43	69.9	2e-10	0.0108203
TCONS_00018912	699	CNT0003937_vitis	0.89	0	56	63.9	2e-09	0.0801144
TCONS_00031335	2562	CNT0004009_vitis	1	0	34	67.9	5e-10	0.0132709
TCONS_00016287	463	CNT0004104_vitis	1	0	33	65.9	3e-10	0.0712743
TCONS_00025207	1182	CNT0004137_vitis	0.92	0	104	135	1e-30	0.0879865
TCONS_00017683	818	CNT0004179_vitis	0.83	0	93	65.9	6e-10	0.113692
TCONS_00008120	874	CNT0004232_vitis	1	0	45	89.7	4e-17	0.0514874
TCONS_00034037	1163	CNT0004232_vitis	1	0	44	87.7	2e-16	0.0378332
TCONS_00009355	392	CNT0004335_vitis	0.88	0	97	105	3e-22	0.247449
TCONS_00031197	4613	CNT0004354_vitis	0.97	0	39	69.9	2e-10	0.00845437
TCONS_00009511	1501	CNT0004361_vitis	0.8	0	180	79.8	7e-14	0.11992
TCONS_00009553	1523	CNT0004361_vitis	0.8	0	180	79.8	7e-14	0.118188
TCONS_00030433	665	CNT0004383_vitis	0.81	0	103	54	2e-06	0.154887
TCONS_00030434	661	CNT0004383_vitis	0.81	0	104	56	5e-07	0.157337
TCONS_00030435	669	CNT0004383_vitis	0.81	0	104	56	5e-07	0.155456
TCONS_00030436	660	CNT0004383_vitis	0.81	0	103	54	2e-06	0.156061
TCONS_00030437	638	CNT0004383_vitis	0.81	0	104	56	4e-07	0.163009
TCONS_00031200	907	CNT0004383_vitis	0.81	0.02	335	176	3e-43	0.36935
TCONS_00011399	2461	CNT0004457_vitis	1	0	27	54	7e-06	0.0109711
TCONS_00006163	2990	CNT0004489_vitis	1	0	35	69.9	1e-10	0.0117057
TCONS_00007651	5020	CNT0004552_vitis	0.81	0	157	81.8	6e-14	0.0312749
TCONS_00012288	1376	CNT0004655_vitis	0.97	0	35	61.9	2e-08	0.025436
TCONS_00020796	692	CNT0004696_vitis	1	0	27	54	2e-06	0.0390173
TCONS_00005030	2245	CNT0004738_vitis	1	0	29	58	4e-07	0.0129176
TCONS_00003147	655	CNT0004742_vitis	0.79	0	158	60	3e-08	0.241221
TCONS_00016311	508	CNT0004742_vitis	0.93	0	45	65.9	4e-10	0.0885827
TCONS_00016312	684	CNT0004742_vitis	0.93	0	45	65.9	5e-10	0.0657895
TCONS_00026313	860	CNT0004936_vitis	0.9	0.02	87	103	3e-21	0.101163
TCONS_00030313	370	CNT0004976_vitis	0.88	0	69	73.8	1e-12	0.186486
TCONS_00004028	1488	CNT0004985_vitis	0.96	0	55	93.7	5e-18	0.0369624
TCONS_00011019	872	CNT0004985_vitis	0.94	0	36	56	6e-07	0.0412844
TCONS_00034755	699	CNT0004985_vitis	1	0	48	95.6	6e-19	0.0686695
TCONS_00007892	870	CNT0005074_vitis	1	0	32	63.9	2e-09	0.0367816
TCONS_00020853	567	CNT0005074_vitis	1	0	27	54	2e-06	0.047619
TCONS_00023280	459	CNT0005074_vitis	1	0	28	56	3e-07	0.0610022
TCONS_00013392	873	CNT0005346_vitis	1	0	30	60	4e-08	0.0343643
TCONS_00018393	807	CNT0005416_vitis	0.84	0	152	111	1e-23	0.188352
TCONS_00018500	573	CNT0005416_vitis	0.84	0	152	111	8e-24	0.265271
TCONS_00027707	383	CNT0005416_vitis	0.84	0	150	107	8e-23	0.391645
TCONS_00007511	1936	CNT0005502_vitis	0.88	0.03	86	77.8	4e-13	0.0444215
TCONS_00033182	1137	CNT0005535_vitis	0.94	0	35	54	3e-06	0.0307828
TCONS_00032696	598	CNT0005543_vitis	0.85	0	87	69.9	3e-11	0.145485
TCONS_00013906	1397	CNT0005582_vitis	1	0	35	69.9	7e-11	0.0250537
TCONS_00016780	719	CNT0005582_vitis	0.97	0	35	61.9	8e-09	0.0486787
TCONS_00032762	1432	CNT0005582_vitis	1	0	31	61.9	2e-08	0.021648
TCONS_00015134	661	CNT0005620_vitis	0.84	0	126	91.7	8e-18	0.19062
TCONS_00017377	671	CNT0005620_vitis	0.84	0	116	87.7	1e-16	0.172876
TCONS_00034476	430	CNT0005620_vitis	0.84	0	161	121	6e-27	0.374419
TCONS_00002908	1453	CNT0005686_vitis	1	0	27	54	4e-06	0.0185822
TCONS_00009850	504	CNT0005713_vitis	0.93	0.02	48	63.9	1e-09	0.0952381
TCONS_00012065	1361	CNT0005713_vitis	1	0	28	56	1e-06	0.0205731
TCONS_00023374	1338	CNT0005801_vitis	0.97	0	36	63.9	4e-09	0.0269058
TCONS_00029471	386	CNT0005837_vitis	0.97	0	36	63.9	1e-09	0.0932642
TCONS_00029878	1621	CNT0005870_vitis	0.81	0	208	103	5e-21	0.128316
TCONS_00000876	364	CNT0005984_vitis	0.98	0	78	147	9e-35	0.214286
TCONS_00006676	344	CNT0005984_vitis	0.98	0	82	155	3e-37	0.238372
TCONS_00023807	1326	CNT0006171_vitis	0.87	0	95	93.7	4e-18	0.071644
TCONS_00023808	1266	CNT0006171_vitis	0.87	0	95	93.7	4e-18	0.0750395
TCONS_00007345	1279	CNT0006299_vitis	1	0	27	54	4e-06	0.0211102
TCONS_00019132	1581	CNT0006299_vitis	0.96	0	31	54	4e-06	0.0196078
TCONS_00026454	1325	CNT0006299_vitis	1	0	31	61.9	2e-08	0.0233962
TCONS_00026747	826	CNT0006299_vitis	1	0	34	67.9	2e-10	0.0411622
TCONS_00007177	758	CNT0006318_vitis	1	0	28	56	5e-07	0.0369393
TCONS_00023074	665	CNT0006382_vitis	1	0	38	75.8	5e-13	0.0571429
TCONS_00015471	4184	CNT0006487_vitis	0.87	0	89	89.7	2e-16	0.0212715
TCONS_00017361	1977	CNT0006487_vitis	0.91	0	61	81.8	2e-14	0.0308548
TCONS_00015409	1592	CNT0006607_vitis	0.96	0	52	87.7	3e-16	0.0326633
TCONS_00015410	1986	CNT0006607_vitis	0.96	0	52	87.7	4e-16	0.0261833
TCONS_00022359	2271	CNT0006607_vitis	0.97	0	43	77.8	4e-13	0.0189344
TCONS_00022360	2300	CNT0006607_vitis	0.97	0	43	77.8	4e-13	0.0186957
TCONS_00030594	3302	CNT0006649_vitis	0.91	0	56	71.9	4e-11	0.0169594
TCONS_00033023	1996	CNT0006669_vitis	0.9	0	130	155	2e-36	0.0651303
TCONS_00018675	5170	CNT0006807_vitis	0.9	0	50	60	2e-07	0.00967118
TCONS_00022472	468	CNT0006832_vitis	0.84	0	169	121	7e-27	0.361111
TCONS_00004388	465	CNT0006976_vitis	0.83	0	193	129	3e-29	0.415054
TCONS_00004541	620	CNT0007011_vitis	0.94	0.02	38	52	7e-06	0.0612903
TCONS_00003247	225	CNT0007073_vitis	0.97	0	34	60	1e-08	0.151111
TCONS_00000435	604	CNT0007118_vitis	0.88	0	113	121	8e-27	0.187086
TCONS_00002128	275	CNT0007328_vitis	0.86	0	72	63.9	8e-10	0.261818
TCONS_00017454	303	CNT0007372_vitis	0.97	0	38	67.9	5e-11	0.125413
TCONS_00024521	1643	CNT0007372_vitis	0.97	0	45	81.8	2e-14	0.0273889
TCONS_00012365	932	CNT0007373_vitis	0.96	0	31	54	3e-06	0.0332618
TCONS_00009007	932	CNT0007384_vitis	1	0	29	58	2e-07	0.0311159
TCONS_00008342	8481	CNT0007402_vitis	0.96	0	51	85.7	7e-15	0.00601344
TCONS_00028858	4036	CNT0007402_vitis	0.87	0	63	61.9	5e-08	0.0156095
TCONS_00025031	1553	CNT0007478_vitis	0.97	0	42	75.8	1e-12	0.0270444
TCONS_00005926	647	CNT0007500_vitis	0.96	0	30	52	7e-06	0.0463679
TCONS_00002663	1956	CNT0007513_potato	0.83	0	130	91.7	3e-17	0.0664622
TCONS_00000663	545	CNT0007537_potato	0.9	0	42	52	6e-06	0.0770642
TCONS_00019418	782	CNT0007549_potato	0.93	0	61	89.7	4e-17	0.0780051
TCONS_00019419	2246	CNT0007549_potato	0.93	0	61	89.7	1e-16	0.0271594
TCONS_00001727	1318	CNT0007768_potato	0.86	0	60	56	9e-07	0.0455235
TCONS_00007588	1712	CNT0007824_potato	0.81	0	167	85.7	1e-15	0.0975467
TCONS_00026154	5616	CNT0008030_potato	0.88	0	97	105	5e-21	0.0172721
TCONS_00013464	2978	CNT0008042_potato	0.82	0	105	65.9	2e-09	0.0352586
TCONS_00007130	1021	CNT0008225_potato	1	0	27	54	3e-06	0.0264447
TCONS_00019002	252	CNT0008240_potato	0.88	0	53	58	4e-08	0.210317
TCONS_00025229	953	CNT0008257_potato	0.81	0	411	196	3e-49	0.43127
TCONS_00007739	3282	CNT0008536_potato	0.84	0	272	198	3e-49	0.0828763
TCONS_00007740	7494	CNT0008536_potato	0.84	0	272	198	6e-49	0.0362957
TCONS_00020605	531	CNT0008558_potato	0.97	0	36	63.9	2e-09	0.0677966
TCONS_00010591	1003	CNT0008661_potato	0.89	0	49	58	2e-07	0.0488534
TCONS_00000278	1443	CNT0008687_potato	0.82	0	564	333	3e-90	0.390852
TCONS_00004872	508	CNT0008745_potato	0.9	0	42	52	5e-06	0.0826772
TCONS_00012190	252	CNT0008769_potato	0.97	0	35	61.9	3e-09	0.138889
TCONS_00034733	1230	CNT0008904_potato	1	0	28	56	9e-07	0.0227642
TCONS_00014316	2022	CNT0008948_potato	0.83	0	137	89.7	1e-16	0.0677547
TCONS_00017844	597	CNT0009108_potato	0.85	0	128	103	2e-21	0.214405
TCONS_00012471	1938	CNT0009163_potato	0.79	0	220	71.9	2e-11	0.113519
TCONS_00012472	2169	CNT0009163_potato	0.79	0	220	71.9	3e-11	0.101429
TCONS_00012473	2092	CNT0009163_potato	0.79	0	220	71.9	2e-11	0.105163
TCONS_00029391	1034	CNT0009357_potato	0.88	0	89	97.6	2e-19	0.0860735
TCONS_00017501	1407	CNT0009429_potato	0.86	0	105	97.6	3e-19	0.0746269
TCONS_00009686	1357	CNT0009480_potato	0.8	0	136	63.9	4e-09	0.100221
TCONS_00012155	285	CNT0009530_potato	0.94	0	34	52	3e-06	0.119298
TCONS_00029210	649	CNT0009612_potato	0.88	0.01	59	54	2e-06	0.0909091
TCONS_00008488	536	CNT0009686_potato	0.97	0	81	145	5e-34	0.151119
TCONS_00000479	3654	CNT0009941_potato	0.82	0	210	131	5e-29	0.0574713
TCONS_00008618	2146	CNT0009941_potato	0.87	0	108	103	7e-21	0.0503262
TCONS_00008619	1529	CNT0009941_potato	0.87	0	108	103	5e-21	0.0706344
TCONS_00031655	1344	CNT0010227_potato	0.8	0	182	75.8	1e-12	0.135417
TCONS_00013431	2439	CNT0010404_potato	0.9	0	62	75.8	2e-12	0.0254203
TCONS_00032713	2154	CNT0010404_potato	0.9	0	62	75.8	2e-12	0.0287837
TCONS_00032362	724	CNT0010433_potato	0.91	0	60	79.8	3e-14	0.0828729
TCONS_00006132	3766	CNT0010524_potato	1	0	39	77.8	7e-13	0.0103558
TCONS_00030309	2374	CNT0010524_potato	1	0	39	77.8	5e-13	0.016428
TCONS_00010042	1192	CNT0010557_potato	0.89	0	55	61.9	1e-08	0.0461409
TCONS_00023200	505	CNT0010588_potato	0.96	0	32	56	3e-07	0.0633663
TCONS_00001229	653	CNT0010589_potato	0.83	0	95	61.9	7e-09	0.145482
TCONS_00027396	1038	CNT0010784_potato	0.92	0	51	69.9	5e-11	0.0491329
TCONS_00021835	730	CNT0010852_potato	0.9	0	109	137	2e-31	0.149315
TCONS_00006898	407	CNT0010957_potato	0.88	0	50	52	4e-06	0.12285
TCONS_00021389	1981	CNT0010957_potato	0.85	0	78	67.9	4e-10	0.0393741
TCONS_00021390	2144	CNT0010957_potato	0.85	0	78	67.9	4e-10	0.0363806
TCONS_00007700	4996	CNT0011044_potato	0.88	0	99	109	3e-22	0.0198159
TCONS_00010772	1218	CNT0011045_potato	0.87	0	55	54	3e-06	0.045156
TCONS_00030074	4272	CNT0011081_potato	0.83	0	93	65.9	3e-09	0.0217697
TCONS_00030073	1328	CNT0011086_potato	0.91	0	48	63.9	4e-09	0.0361446
TCONS_00023025	506	CNT0011154_potato	0.97	0	35	61.9	6e-09	0.06917
TCONS_00026409	553	CNT0011167_potato	0.85	0	149	121	8e-27	0.269439
TCONS_00033969	389	CNT0011398_potato	0.84	0	88	63.9	1e-09	0.226221
TCONS_00015838	3659	CNT0011682_potato	0.82	0	164	103	1e-20	0.044821
TCONS_00030369	661	CNT0011682_potato	0.83	0	167	109	4e-23	0.252648
TCONS_00000909	805	CNT0011817_potato	0.84	0	125	97.6	2e-19	0.15528
TCONS_00034553	8245	CNT0011914_potato	0.86	0	105	97.6	2e-18	0.012735
TCONS_00028568	1114	CNT0012082_potato	0.85	0	74	60	5e-08	0.0664273
TCONS_00027592	3355	CNT0012188_potato	0.91	0	45	58	6e-07	0.0134128
TCONS_00005270	325	CNT0012326_potato	1	0	27	54	9e-07	0.0830769
TCONS_00032562	3852	CNT0012331_potato	0.81	0	644	343	8e-93	0.167186
TCONS_00015093	541	CNT0012431_potato	0.9	0.01	51	54	1e-06	0.0942699
TCONS_00029340	652	CNT0012477_potato	0.82	0	200	111	9e-24	0.306748
TCONS_00001794	725	CNT0012540_potato	1	0	29	58	1e-07	0.04
TCONS_00032272	830	CNT0012540_potato	1	0	27	54	2e-06	0.0325301
TCONS_00032273	1161	CNT0012540_potato	1	0	29	58	2e-07	0.0249785
TCONS_00032277	1463	CNT0012540_potato	1	0	29	58	3e-07	0.0198223
TCONS_00010755	1607	CNT0012634_potato	0.94	0	57	89.7	8e-17	0.0354698
TCONS_00010083	4528	CNT0012778_potato	0.95	0	41	65.9	3e-09	0.00905477
TCONS_00022415	3618	CNT0012778_potato	0.95	0.02	48	71.9	4e-11	0.013267
TCONS_00027268	2367	CNT0012795_potato	0.91	0.01	73	89.7	1e-16	0.0308407
TCONS_00010093	900	CNT0012866_potato	1	0	29	58	2e-07	0.0322222
TCONS_00005844	5728	CNT0012934_potato	1	0	44	87.7	1e-15	0.00768156
TCONS_00010201	3485	CNT0012934_potato	1	0	44	87.7	7e-16	0.0126255
TCONS_00013203	5263	CNT0012934_potato	0.97	0	41	73.8	2e-11	0.00779023
TCONS_00014167	1349	CNT0013560_potato	0.97	0	38	67.9	2e-10	0.028169
TCONS_00021782	869	CNT0013596_potato	0.96	0	32	58	2e-07	0.0368239
TCONS_00010774	815	CNT0013655_potato	0.91	0	49	65.9	6e-10	0.0601227
TCONS_00025812	2447	CNT0013655_potato	0.91	0	46	65.9	2e-09	0.0187985
TCONS_00000792	574	CNT0013660_potato	0.88	0	53	58	1e-07	0.0923345
TCONS_00016327	651	CNT0013683_potato	0.85	0	62	52	7e-06	0.0952381
TCONS_00008584	1546	CNT0013687_potato	0.85	0	139	117	3e-25	0.0899094
TCONS_00033438	281	CNT0013823_potato	0.95	0	41	65.9	2e-10	0.145907
TCONS_00011062	4370	CNT0013840_potato	0.86	0	83	77.8	8e-13	0.0189931
TCONS_00013856	722	CNT0013901_potato	0.96	0	30	52	8e-06	0.0415512
TCONS_00001972	1813	CNT0014084_potato	0.79	0	226	83.8	6e-15	0.124655
TCONS_00001973	1368	CNT0014084_potato	0.79	0	226	83.8	4e-15	0.165205
TCONS_00002388	1208	CNT0014092_potato	0.84	0	91	69.9	6e-11	0.0753311
TCONS_00011583	8007	CNT0014093_potato	0.89	0	49	58	1e-06	0.00611965
TCONS_00009064	1236	CNT0014239_potato	0.85	0	103	85.7	1e-15	0.0833333
TCONS_00009044	2498	CNT0014306_potato	0.9	0	43	54	7e-06	0.0172138
TCONS_00010989	1492	CNT0014407_potato	0.94	0	38	60	7e-08	0.0254692
TCONS_00015466	3717	CNT0014962_potato	0.94	0	37	58	7e-07	0.00995426
TCONS_00015467	3739	CNT0014962_potato	0.94	0	37	58	7e-07	0.00989569
TCONS_00001619	429	CNT0015071_potato	0.85	0	74	60	2e-08	0.172494
TCONS_00025048	8797	CNT0015243_potato	0.95	0	42	67.9	2e-09	0.00477435
TCONS_00031930	593	CNT0015413_potato	0.89	0	59	69.9	3e-11	0.0994941
TCONS_00001645	935	CNT0015596_potato	1	0	30	60	4e-08	0.0320856
TCONS_00003748	727	CNT0015596_potato	1	0	30	60	3e-08	0.0412655
TCONS_00026681	4074	CNT0015596_potato	1	0	32	63.9	1e-08	0.00785469
TCONS_00001108	668	CNT0015735_potato	0.89	0	89	105	6e-22	0.133234
TCONS_00012672	525	CNT0015735_potato	1	0	29	58	9e-08	0.0552381
TCONS_00013484	1740	CNT0015735_potato	1	0	32	63.9	5e-09	0.0183908
TCONS_00032557	1081	CNT0015738_potato	1	0	31	61.9	1e-08	0.0286772
TCONS_00018864	2789	CNT0015936_potato	0.94	0	38	60	1e-07	0.013625
TCONS_00021087	298	CNT0015951_potato	0.84	0	88	63.9	8e-10	0.295302
TCONS_00029614	887	CNT0016367_potato	0.78	0	418	115	8e-25	0.471251
TCONS_00027619	1992	CNT0016457_potato	0.97	0	35	61.9	2e-08	0.0175703
TCONS_00027620	2004	CNT0016457_potato	0.97	0	35	61.9	2e-08	0.0174651
TCONS_00007252	399	CNT0016573_potato	0.85	0.04	124	83.8	1e-15	0.310777
TCONS_00023640	440	CNT0016675_potato	0.87	0	238	242	2e-63	0.540909
TCONS_00025051	6400	CNT0016727_potato	0.91	0	353	462	1e-128	0.0551562
TCONS_00026587	241	CNT0016727_potato	0.92	0	96	135	2e-31	0.39834
TCONS_00018865	2743	CNT0016865_potato	0.94	0	37	58	5e-07	0.0134889
TCONS_00003199	2422	CNT0016889_potato	0.93	0	49	73.8	7e-12	0.0202312
TCONS_00004351	663	CNT0016944_potato	0.84	0	108	79.8	3e-14	0.162896
TCONS_00001793	416	CNT0017651_zea	1	0	26	52	4e-06	0.0625
TCONS_00014543	5205	CNT0017651_zea	1	0	29	58	9e-07	0.00557157
TCONS_00018674	4908	CNT0017651_zea	0.97	0	42	75.8	4e-12	0.00855746
TCONS_00032275	685	CNT0017651_zea	1	0	26	52	7e-06	0.0379562
TCONS_00031680	411	CNT0017903_zea	0.88	0	282	297	4e-80	0.686131
TCONS_00017368	1605	CNT0017917_zea	0.9	0	43	54	4e-06	0.0267913
TCONS_00026498	1473	CNT0018020_zea	0.82	0	167	101	2e-20	0.113374
TCONS_00019009	1057	CNT0018242_zea	0.92	0	42	60	5e-08	0.0397351
TCONS_00003561	3304	CNT0019015_zea	1	0	34	67.9	6e-10	0.0102906
TCONS_00007210	708	CNT0019112_zea	1	0	33	65.9	5e-10	0.0466102
TCONS_00033009	5394	CNT0019427_zea	0.87	0	58	60	2e-07	0.0107527
TCONS_00020160	3077	CNT0019609_zea	1	0	27	54	9e-06	0.00877478
TCONS_00031757	1508	CNT0019609_zea	0.97	0	36	63.9	4e-09	0.0238727
TCONS_00013159	1477	CNT0019907_zea	1	0	30	60	7e-08	0.0203114
TCONS_00030938	833	CNT0019943_zea	1	0	26	52	9e-06	0.0312125
TCONS_00026606	1253	CNT0019995_zea	1	0	46	91.7	2e-17	0.0367119
TCONS_00021140	1982	CNT0020781_zea	1	0	48	95.6	2e-18	0.024218
TCONS_00024939	494	CNT0021683_amborella	0.9	0	43	54	1e-06	0.0870445
TCONS_00029059	808	CNT0021683_amborella	0.9	0	311	394	1e-109	0.384901
TCONS_00010813	1589	CNT0021733_amborella	0.82	0	287	165	2e-39	0.180617
TCONS_00029350	2128	CNT0021761_amborella	1	0	39	77.8	4e-13	0.0183271
TCONS_00011303	1104	CNT0021762_amborella	0.8	0	166	75.8	8e-13	0.150362
TCONS_00006344	4984	CNT0021767_amborella	0.87	0	106	99.6	3e-19	0.0212681
TCONS_00015209	416	CNT0021869_amborella	0.9	0	44	56	3e-07	0.105769
TCONS_00011827	395	CNT0022005_amborella	0.86	0	59	54	1e-06	0.149367
TCONS_00006812	1948	CNT0022055_amborella	1	0	47	93.7	6e-18	0.0241273
TCONS_00028613	1011	CNT0022055_amborella	0.95	0	48	79.8	5e-14	0.0474777
TCONS_00028857	2145	CNT0022124_amborella	1	0	28	56	2e-06	0.0130536
TCONS_00023617	790	CNT0022312_amborella	0.91	0	56	71.9	9e-12	0.0708861
TCONS_00027591	4778	CNT0022393_amborella	0.94	0	39	61.9	6e-08	0.00816241
TCONS_00015045	1346	CNT0022486_amborella	0.84	0	110	83.8	4e-15	0.0817236
TCONS_00010601	975	CNT0022559_amborella	0.84	0	76	56	7e-07	0.0779487
TCONS_00028471	969	CNT0022559_amborella	0.84	0	76	56	7e-07	0.0784314
TCONS_00013265	2847	CNT0022602_amborella	0.81	0	198	99.6	2e-19	0.0695469
TCONS_00022450	370	CNT0022750_amborella	0.86	0	59	54	1e-06	0.159459
TCONS_00019035	1221	CNT0022851_amborella	1	0	41	81.8	2e-14	0.033579
TCONS_00023775	311	CNT0022985_amborella	1	0	28	56	2e-07	0.0900322
TCONS_00006553	783	CNT0023205_amborella	0.88	0	68	71.9	9e-12	0.0868455
TCONS_00027612	283	CNT0023430_amborella	0.82	0	98	60	1e-08	0.34629
TCONS_00004809	1567	CNT0023466_amborella	0.96	0	32	56	1e-06	0.0204212
TCONS_00004810	1277	CNT0023466_amborella	0.96	0	32	56	9e-07	0.0250587
TCONS_00010166	1098	CNT0023482_amborella	0.85	0	68	56	8e-07	0.0619308
TCONS_00028553	1314	CNT0023497_amborella	0.95	0	47	77.8	3e-13	0.0357686
TCONS_00010050	1237	CNT0023556_amborella	0.92	0	40	56	9e-07	0.0323363
TCONS_00010051	1243	CNT0023556_amborella	0.92	0	40	56	9e-07	0.0321802
TCONS_00010052	1388	CNT0023556_amborella	0.92	0	40	56	1e-06	0.0288184
TCONS_00000348	529	CNT0023653_amborella	0.83	0	131	85.7	4e-16	0.247637
TCONS_00008786	446	CNT0023687_amborella	0.85	0	142	115	4e-25	0.318386
TCONS_00025999	1108	CNT0023687_amborella	0.87	0	142	139	7e-32	0.128159
TCONS_00034175	1086	CNT0023772_amborella	1	0	34	67.9	2e-10	0.0313076
TCONS_00021302	938	CNT0023866_amborella	0.85	0	90	75.8	7e-13	0.0959488
TCONS_00009966	1187	CNT0023914_amborella	1	0	27	54	3e-06	0.0227464
TCONS_00012735	1866	CNT0023995_amborella	0.95	0	48	79.8	9e-14	0.0257235
TCONS_00010455	830	CNT0024026_amborella	0.83	0	74	52	9e-06	0.0891566
TCONS_00027778	598	CNT0024167_amborella	1	0	36	71.9	7e-12	0.0602007
TCONS_00020582	3393	CNT0024387_oryza	0.95	0.02	42	60	2e-07	0.0123784
TCONS_00019586	2082	CNT0025172_oryza	0.97	0	35	61.9	2e-08	0.0168108
TCONS_00018621	2620	CNT0025243_oryza	1	0	29	58	5e-07	0.0110687
TCONS_00003545	9545	CNT0025626_oryza	1	0	38	75.8	7e-12	0.00398114
TCONS_00003546	2337	CNT0025626_oryza	1	0	38	75.8	2e-12	0.0162602
TCONS_00005594	737	CNT0025626_oryza	0.9	0	44	56	5e-07	0.0597015
TCONS_00006131	1973	CNT0025626_oryza	0.95	0	86	139	1e-31	0.0435884
TCONS_00008933	841	CNT0025626_oryza	0.93	0	47	69.9	4e-11	0.0558859
TCONS_00006423	892	CNT0025870_oryza	0.96	0	30	52	1e-05	0.0336323
TCONS_00015411	527	CNT0025870_oryza	1	0	30	60	2e-08	0.056926
TCONS_00019654	2161	CNT0026060_oryza	0.89	0	47	54	6e-06	0.0217492
TCONS_00019655	2225	CNT0026060_oryza	0.89	0	47	54	6e-06	0.0211236
TCONS_00019656	2222	CNT0026060_oryza	0.89	0	47	54	6e-06	0.0211521
TCONS_00023027	885	CNT0026326_oryza	1	0	56	111	1e-23	0.0632768
TCONS_00023639	1139	CNT0026326_oryza	1	0	28	56	8e-07	0.024583
TCONS_00008674	5325	CNT0026605_oryza	0.96	0	32	56	4e-06	0.00600939
TCONS_00008675	7935	CNT0026605_oryza	0.96	0	32	56	6e-06	0.00403277
TCONS_00020798	442	CNT0026949_oryza	1	0	26	52	5e-06	0.0588235
TCONS_00018123	915	CNT0026995_oryza	1	0	33	65.9	7e-10	0.0360656
TCONS_00008954	1068	CNT0027131_oryza	0.94	0	35	54	3e-06	0.0327715
TCONS_00009715	4186	CNT0027397_oryza	0.92	0	53	73.8	1e-11	0.0126613
TCONS_00008170	1063	CNT0027419_oryza	0.96	0	31	54	3e-06	0.0291627
TCONS_00034109	1484	CNT0027419_oryza	0.96	0	32	56	1e-06	0.0215633
TCONS_00014833	500	CNT0027503_oryza	1	0	35	69.9	2e-11	0.07
TCONS_00031591	573	CNT0027503_oryza	1	0	35	69.9	3e-11	0.061082
TCONS_00014676	1783	CNT0028305_oryza	0.8	0	215	101	2e-20	0.120583
TCONS_00028667	1814	CNT0028316_oryza	0.96	0	33	58	3e-07	0.0181918
TCONS_00001427	8371	CNT0028376_oryza	0.91	0	60	79.8	4e-13	0.0071676
TCONS_00013264	814	CNT0028376_oryza	0.87	0	163	157	2e-37	0.200246
TCONS_00022031	681	CNT0028376_oryza	0.87	0.02	184	182	3e-45	0.270191
TCONS_00022542	521	CNT0028434_oryza	1	0	29	58	9e-08	0.0556622
TCONS_00001467	791	CNT0028571_oryza	1	0	26	52	9e-06	0.0328698
TCONS_00021141	2069	CNT0028601_oryza	1	0	49	97.6	4e-19	0.0236829
TCONS_00023113	740	CNT0029013_oryza	1	0	28	56	5e-07	0.0378378
TCONS_00030335	226	CNT0029100_oryza	0.96	0	33	58	4e-08	0.146018
TCONS_00017025	548	CNT0029172_oryza	1	0	29	58	1e-07	0.0529197
TCONS_00018598	2308	CNT0029329_oryza	1	0	28	56	2e-06	0.0121317
TCONS_00027686	3873	CNT0029752_oryza	0.95	0	40	63.9	1e-08	0.0103279
TCONS_00009438	1572	CNT0029790_oryza	0.96	0	32	56	1e-06	0.0203562
TCONS_00000368	1140	CNT0029868_oryza	0.87	0	64	63.9	3e-09	0.0561404
TCONS_00004715	3049	CNT0030302_oryza	0.98	0	50	91.7	4e-17	0.0163988
TCONS_00004716	3116	CNT0030302_oryza	0.98	0	50	91.7	4e-17	0.0160462
TCONS_00033574	1643	CNT0030502_oryza	0.89	0	109	129	1e-28	0.0663421
TCONS_00003751	833	CNT0030706_oryza	0.94	0	36	56	6e-07	0.0432173
TCONS_00014135	3167	CNT0030706_oryza	0.87	0	62	60	1e-07	0.0195769
TCONS_00021250	768	CNT0030706_oryza	0.91	0.02	47	54	2e-06	0.0611979
TCONS_00003805	1266	CNT0030919_oryza	0.94	0	36	56	9e-07	0.028436
TCONS_00031696	1010	CNT0031047_oryza	0.96	0	33	58	2e-07	0.0326733
TCONS_00000026	2381	CNT0031673_oryza	0.84	0	86	67.9	4e-10	0.0361193
TCONS_00014592	3099	CNT0031676_oryza	0.97	0	44	79.8	2e-13	0.0141981
TCONS_00023898	684	CNT0031676_oryza	0.97	0	46	83.8	2e-15	0.0672515
TCONS_00005777	284	CNT0031800_oryza	0.97	0	45	81.8	3e-15	0.158451
TCONS_00021882	1154	CNT0031800_oryza	0.98	0	53	97.6	2e-19	0.0459272
TCONS_00013138	669	CNT0031899_oryza	0.97	0	34	60	3e-08	0.0508221
TCONS_00028249	1442	CNT0031911_oryza	1	0	35	69.9	7e-11	0.0242718
TCONS_00016719	824	CNT0032211_oryza	1	0	26	52	9e-06	0.0315534
TCONS_00011002	559	CNT0032635_oryza	0.95	0	43	69.9	3e-11	0.0769231
TCONS_00024463	1630	CNT0032671_oryza	0.79	0	194	67.9	3e-10	0.119018
TCONS_00024464	1362	CNT0032671_oryza	0.79	0	194	67.9	3e-10	0.142438
TCONS_00026499	609	CNT0032910_physcomitrella	1	0	34	67.9	1e-10	0.0558292
TCONS_00002625	1635	CNT0032970_physcomitrella	1	0	38	75.8	1e-12	0.0232416
TCONS_00031703	955	CNT0033040_physcomitrella	0.95	0	73	121	1e-26	0.0764398
TCONS_00000165	1066	CNT0033348_physcomitrella	1	0	29	58	2e-07	0.0272045
TCONS_00003440	2928	CNT0033420_physcomitrella	1	0	32	63.9	9e-09	0.010929
TCONS_00010645	1218	CNT0033420_physcomitrella	1	0	27	54	3e-06	0.0221675
TCONS_00003439	1320	CNT0033545_physcomitrella	1	0	30	60	6e-08	0.0227273
TCONS_00012223	2084	CNT0033545_physcomitrella	1	0	36	71.9	2e-11	0.0172745
TCONS_00025209	328	CNT0033545_physcomitrella	1	0	27	54	9e-07	0.0823171
TCONS_00021195	690	CNT0033570_physcomitrella	1	0	27	54	2e-06	0.0391304
TCONS_00029756	2951	CNT0033612_physcomitrella	1	0	31	61.9	3e-08	0.0105049
TCONS_00015224	1410	CNT0033765_physcomitrella	1	0	27	54	4e-06	0.0191489
TCONS_00010936	501	CNT0033820_physcomitrella	0.9	0	44	56	3e-07	0.0878244
TCONS_00010937	622	CNT0033820_physcomitrella	0.9	0	44	56	4e-07	0.0707395
TCONS_00033791	436	CNT0033820_physcomitrella	0.9	0	44	56	3e-07	0.100917
TCONS_00004960	2667	CNT0033898_physcomitrella	0.96	0	31	54	7e-06	0.0116235
TCONS_00004962	2744	CNT0033898_physcomitrella	0.96	0	31	54	8e-06	0.0112974
TCONS_00010764	350	CNT0033898_physcomitrella	0.97	0	39	69.9	2e-11	0.111429
TCONS_00032548	900	CNT0033898_physcomitrella	1	0	33	65.9	7e-10	0.0366667
TCONS_00012090	783	CNT0034038_physcomitrella	1	0	26	52	9e-06	0.0332056
TCONS_00012171	732	CNT0034231_physcomitrella	1	0	37	73.8	2e-12	0.0505464
TCONS_00009404	2663	CNT0034327_physcomitrella	0.95	0	72	119	2e-25	0.0270372
TCONS_00013405	601	CNT0034528_physcomitrella	1	0	27	54	2e-06	0.0449251
TCONS_00031465	878	CNT0034943_physcomitrella	1	0	27	54	2e-06	0.0307517
TCONS_00002511	4914	CNT0035158_physcomitrella	0.97	0	38	67.9	9e-10	0.00773301
TCONS_00033364	1395	CNT0035158_physcomitrella	0.95	0	43	69.9	7e-11	0.0308244
TCONS_00017623	1181	CNT0035397_physcomitrella	1	0	27	54	3e-06	0.022862
TCONS_00009390	487	CNT0035510_chlamydomonas	1	0	27	54	1e-06	0.0554415
TCONS_00003394	3277	CNT0035548_chlamydomonas	1	0	28	56	2e-06	0.0085444
TCONS_00000279	878	CNT0035657_chlamydomonas	1	0	29	58	2e-07	0.0330296
TCONS_00004194	380	CNT0035839_chlamydomonas	0.97	0	41	73.8	1e-12	0.107895
TCONS_00023868	596	CNT0035868_chlamydomonas	1	0	26	52	6e-06	0.0436242
TCONS_00027233	985	CNT0035977_chlamydomonas	1	0	33	65.9	7e-10	0.0335025
TCONS_00032761	1284	CNT0035977_chlamydomonas	1	0	44	87.7	3e-16	0.0342679
TCONS_00008907	667	CNT0036042_chlamydomonas	1	0	28	56	5e-07	0.041979
TCONS_00026520	2767	CNT0036309_chlamydomonas	0.94	0	37	58	5e-07	0.0133719
TCONS_00008963	1775	CNT0036613_chlamydomonas	0.97	0	36	63.9	5e-09	0.0202817
TCONS_00019909	728	CNT0036665_chlamydomonas	0.94	0	35	54	2e-06	0.0480769
TCONS_00003359	452	CNT0036841_chlamydomonas	0.94	0	39	61.9	5e-09	0.0862832
TCONS_00031580	1289	CNT0036841_chlamydomonas	0.92	0	65	89.7	7e-17	0.0504267
TCONS_00009989	1377	CNT0036843_chlamydomonas	1	0	29	58	2e-07	0.0210603
TCONS_00009990	1303	CNT0036843_chlamydomonas	1	0	29	58	2e-07	0.0222563
TCONS_00026632	498	CNT0036890_chlamydomonas	1	0	36	71.9	6e-12	0.0722892
TCONS_00029585	520	CNT0036890_chlamydomonas	0.96	0	31	54	1e-06	0.0596154
TCONS_00001974	2732	CNT0037051_chlamydomonas	1	0	39	77.8	5e-13	0.0142753
TCONS_00001667	419	CNT0037467_chlamydomonas	1	0	27	54	1e-06	0.0644391
TCONS_00016638	2006	CNT0038248_selaginella	1	0	31	61.9	2e-08	0.0154536
TCONS_00028524	573	CNT0039900_selaginella	1	0	28	56	4e-07	0.0488656
TCONS_00001781	1395	CNT0040165_selaginella	0.97	0	38	67.9	3e-10	0.0272401
TCONS_00014161	1796	CNT0040681_arabidopsis	1	0	27	54	5e-06	0.0150334
TCONS_00030784	968	CNT0041092_arabidopsis	0.9	0	50	60	4e-08	0.0516529
TCONS_00020924	1824	CNT0041233_arabidopsis	0.84	0	95	69.9	9e-11	0.0520833
TCONS_00027410	801	CNT0041341_arabidopsis	0.82	0	82	52	9e-06	0.102372
TCONS_00024021	2195	CNT0041416_arabidopsis	1	0	27	54	6e-06	0.0123007
TCONS_00031974	289	CNT0041656_arabidopsis	1	0	37	73.8	8e-13	0.128028
TCONS_00014405	1875	CNT0041806_arabidopsis	0.88	0	51	54	5e-06	0.0272
TCONS_00014317	1951	CNT0042012_arabidopsis	0.89	0	48	56	1e-06	0.0246028
TCONS_00033564	1272	CNT0042305_arabidopsis	0.93	0	161	232	7e-60	0.126572
TCONS_00016737	658	CNT0042313_arabidopsis	0.82	0	131	77.8	1e-13	0.199088
TCONS_00003700	1817	CNT0042428_arabidopsis	0.88	0.05	77	60	8e-08	0.0423775
TCONS_00033287	2755	CNT0042428_arabidopsis	0.88	0.05	77	60	1e-07	0.0279492
TCONS_00027532	585	CNT0042479_arabidopsis	0.96	0	30	52	6e-06	0.0512821
TCONS_00007918	1267	CNT0042557_arabidopsis	0.84	0	101	73.8	4e-12	0.0797159
TCONS_00016167	2002	CNT0042615_arabidopsis	1	0	55	109	1e-22	0.0274725
TCONS_00016080	1081	CNT0042889_arabidopsis	1	0	32	63.9	3e-09	0.0296022
TCONS_00028092	411	CNT0042934_arabidopsis	0.97	0	70	123	1e-27	0.170316
TCONS_00028093	211	CNT0042934_arabidopsis	0.88	0	109	113	7e-25	0.516588
TCONS_00005273	1993	CNT0043554_arabidopsis	1	0	57	113	7e-24	0.0286001
TCONS_00011351	2660	CNT0043554_arabidopsis	0.93	0	44	63.9	8e-09	0.0165414
TCONS_00012674	487	CNT0043554_arabidopsis	0.97	0	49	89.7	2e-17	0.100616
TCONS_00015959	784	CNT0043554_arabidopsis	1	0	39	77.8	1e-13	0.0497449
TCONS_00019505	1225	CNT0043554_arabidopsis	0.98	0	50	91.7	2e-17	0.0408163
TCONS_00019506	1119	CNT0043554_arabidopsis	0.98	0	50	91.7	1e-17	0.0446828
TCONS_00019507	1082	CNT0043554_arabidopsis	0.98	0	50	91.7	1e-17	0.0462107
TCONS_00019679	3176	CNT0043554_arabidopsis	0.95	0	41	65.9	2e-09	0.0129093
TCONS_00023938	1128	CNT0043554_arabidopsis	0.95	0	42	67.9	2e-10	0.037234
TCONS_00024366	561	CNT0043554_arabidopsis	1	0	47	93.7	2e-18	0.083779
TCONS_00024393	991	CNT0043554_arabidopsis	0.95	0	49	81.8	1e-14	0.049445
TCONS_00029972	1671	CNT0043554_arabidopsis	0.96	0	57	97.6	3e-19	0.0341113
TCONS_00032605	4165	CNT0043554_arabidopsis	1	0	55	109	2e-22	0.0132053
TCONS_00004259	1036	CNT0043724_arabidopsis	0.84	0	75	54	3e-06	0.0723938
TCONS_00028785	1247	CNT0043727_arabidopsis	1	0	27	54	3e-06	0.021652
TCONS_00025096	1323	CNT0043763_arabidopsis	1	0	29	58	2e-07	0.0219199
TCONS_00032515	1416	CNT0043947_arabidopsis	0.92	0	39	54	4e-06	0.0275424
TCONS_00029475	316	CNT0043994_arabidopsis	0.88	0	54	60	1e-08	0.170886
