# Supplementary material for: Regulation of Long Noncoding RNAs Responsive to Phytoplasma Infection in Paulownia tomentosa
Source: Int J Genomics. 2018 Feb 21;2018:3174352. doi: 10.1155/2018/3174352 (PMC5841072; doi:10.1155/2018/3174352)
Supplement: Supplementary 7 — Table S4: classification of predicted lncRNAs into different noncoding RNA families. [file 3174352.f7.xlsx]

## Sheet: Sheet1
Table S4 Classification of predicted lncRNAs into different non-coding RNA families
Family_Name	Family_Accession	LncRNA	start	end	E-value	Score	GC%	Rank
5_8S_rRNA	RF00002	TCONS_00013265	119	272	3.6e-08	38.9	0.49	-1
U1	RF00003	TCONS_00027707	1	148	2.8e-33	121.7	0.61	-1
U1	RF00003	TCONS_00018500	1	150	2.2e-32	118.7	0.64	-2
U1	RF00003	TCONS_00018393	1	150	2.3e-31	115.3	0.65	-3
U2	RF00004	TCONS_00030070	86	281	7e-38	171.3	0.44	-1
U2	RF00004	TCONS_00013434	1	186	2.5e-34	156.5	0.47	-2
U2	RF00004	TCONS_00005759	1	182	1.1e-33	153.9	0.46	-3
U2	RF00004	TCONS_00030069	1	182	4.5e-32	147.1	0.45	-4
U2	RF00004	TCONS_00013437	1	181	1.9e-30	140.4	0.41	-5
U2	RF00004	TCONS_00013435	1	180	1.1e-29	137.1	0.43	-6
U2	RF00004	TCONS_00013438	1	215	3.5e-29	135.1	0.44	-7
U2	RF00004	TCONS_00013436	1	137	2.2e-13	69.2	0.47	-8
tRNA	RF00005	TCONS_00031163	569	641	1.6e-15	70.6	0.55	-1
tRNA	RF00005	TCONS_00033564	537	466	6.8e-14	64.9	0.49	-2
tRNA	RF00005	TCONS_00025031	929	856	1.3e-13	63.8	0.5	-3
tRNA	RF00005	TCONS_00004238	395	324	5.1e-12	58.1	0.56	-4
tRNA	RF00005	TCONS_00032993	848	777	5.1e-12	58.1	0.56	-5
tRNA	RF00005	TCONS_00032994	1224	1153	5.1e-12	58.1	0.56	-6
tRNA	RF00005	TCONS_00033564	1112	1184	9.6e-12	57.1	0.56	-7
tRNA	RF00005	TCONS_00004238	895	824	1.3e-11	56.7	0.57	-8
tRNA	RF00005	TCONS_00032993	310	239	3.8e-11	55	0.56	-9
tRNA	RF00005	TCONS_00032994	686	615	3.8e-11	55	0.56	-10
tRNA	RF00005	TCONS_00032993	1433	1362	4.6e-11	54.7	0.56	-11
tRNA	RF00005	TCONS_00032994	1809	1738	4.6e-11	54.7	0.56	-12
tRNA	RF00005	TCONS_00025031	1149	1079	1.8e-07	41.9	0.54	-13
U3	RF00012	TCONS_00028092	58	275	7.5e-14	65	0.51	-1
U3	RF00012	TCONS_00028093	1	209	1.7e-11	55.9	0.5	-2
SNORD14	RF00016	TCONS_00025207	155	278	3.7e-17	78.4	0.5	-1
SNORD14	RF00016	TCONS_00025207	633	758	1.1e-15	73.1	0.48	-2
U5	RF00020	TCONS_00007931	1	117	7.4e-12	73.2	0.5	-1
tmRNA	RF00023	TCONS_00031163	598	634	0.0072	17.7	0.54	-1
U6	RF00026	TCONS_00004931	150	252	2e-28	110.9	0.46	-1
snoR30	RF00046	TCONS_00032516	303	405	1.3e-15	70.4	0.39	-1
snoR30	RF00046	TCONS_00032515	402	508	5.4e-15	68.2	0.42	-2
mir	RF00053	TCONS_00000033	104	212	4.5e-05	33.6	0.27	-1
mir	RF00053	TCONS_00000033	211	102	0.00093	29	0.27	-2
SNORD25	RF00054	TCONS_00010201	2533	2615	1.5e-14	67.8	0.4	-1
SNORD25	RF00054	TCONS_00013431	1131	1215	1.7e-14	67.7	0.33	-2
SNORD25	RF00054	TCONS_00005844	2585	2667	2.8e-14	66.9	0.39	-3
SNORD25	RF00054	TCONS_00032713	1076	1160	1.2e-13	64.6	0.32	-4
SNORD25	RF00054	TCONS_00013203	3110	3206	5.5e-08	44.1	0.35	-5
SNORD29	RF00070	TCONS_00019949	102	197	0.0033	28	0.4	-1
mir	RF00073	TCONS_00019828	942	1028	2.9e-08	45.9	0.37	-1
mir	RF00073	TCONS_00019829	942	1028	2.9e-08	45.9	0.37	-2
mir	RF00073	TCONS_00019806	343	257	2.9e-08	45.9	0.37	-3
mir	RF00073	TCONS_00034513	760	840	4.3e-08	45.3	0.41	-4
mir	RF00073	TCONS_00019828	1194	1274	6.1e-08	44.7	0.41	-5
mir	RF00073	TCONS_00019829	1194	1274	6.1e-08	44.7	0.41	-6
mir	RF00073	TCONS_00019806	91	11	6.1e-08	44.7	0.41	-7
mir	RF00073	TCONS_00034513	471	551	9e-08	44.1	0.37	-8
mir	RF00073	TCONS_00034513	551	471	4.1e-05	34.3	0.37	-9
mir	RF00073	TCONS_00034513	840	760	5.3e-05	33.9	0.41	-10
mir	RF00073	TCONS_00019828	1274	1194	5.5e-05	33.9	0.41	-11
mir	RF00073	TCONS_00019829	1274	1194	5.5e-05	33.9	0.41	-12
mir	RF00073	TCONS_00019806	11	91	5.5e-05	33.9	0.41	-13
mir	RF00073	TCONS_00019828	1028	942	0.00012	32.6	0.37	-14
mir	RF00073	TCONS_00019829	1028	942	0.00012	32.6	0.37	-15
mir	RF00073	TCONS_00019806	257	343	0.00012	32.6	0.37	-16
mir	RF00073	TCONS_00012735	424	513	0.0017	28.3	0.56	-17
mir	RF00075	TCONS_00034692	157	275	4.8e-24	94	0.43	-1
mir	RF00075	TCONS_00013043	209	396	5.2e-24	93.9	0.35	-2
mir	RF00075	TCONS_00014592	330	442	5.6e-23	90.4	0.41	-3
mir	RF00075	TCONS_00013936	53	226	6.7e-22	86.8	0.4	-4
mir	RF00075	TCONS_00016287	98	227	3.1e-21	84.6	0.38	-5
mir	RF00075	TCONS_00016638	269	369	5e-21	83.9	0.5	-6
mir	RF00075	TCONS_00016638	79	189	4.4e-18	74	0.43	-7
mir	RF00075	TCONS_00004028	248	353	2.6e-16	68.1	0.47	-8
mir	RF00075	TCONS_00016287	227	98	1.1e-13	59.3	0.38	-9
mir	RF00075	TCONS_00012656	338	435	1.2e-12	55.9	0.54	-10
mir	RF00075	TCONS_00009555	181	283	7.5e-12	53.2	0.49	-11
mir	RF00075	TCONS_00014592	442	330	1.3e-10	49	0.41	-12
mir	RF00075	TCONS_00013936	226	53	3.1e-10	47.7	0.4	-13
mir	RF00075	TCONS_00034692	275	157	6.1e-10	46.8	0.43	-14
mir	RF00075	TCONS_00016638	369	269	7.7e-09	43	0.5	-15
mir	RF00075	TCONS_00013043	396	209	3.8e-08	40.7	0.35	-16
mir	RF00075	TCONS_00016638	189	79	4.4e-07	37.2	0.43	-17
mir	RF00075	TCONS_00004028	353	248	7.4e-07	36.4	0.47	-18
mir	RF00075	TCONS_00012656	435	338	2.6e-06	34.6	0.54	-19
mir	RF00075	TCONS_00009555	283	181	2.9e-06	34.4	0.49	-20
mir	RF00075	TCONS_00024328	640	481	0.0047	23.7	0.39	-21
SNORD27	RF00086	TCONS_00010201	1277	1355	6.5e-05	37.9	0.38	-1
SNORD27	RF00086	TCONS_00005844	1315	1394	0.00013	36.7	0.38	-2
SNORD27	RF00086	TCONS_00013203	456	540	0.00015	36.4	0.35	-3
SNORD27	RF00086	TCONS_00005844	426	506	0.0011	32.9	0.33	-4
SNORD27	RF00086	TCONS_00010201	387	467	0.0027	31.3	0.33	-5
SNORD26	RF00087	TCONS_00026658	118	186	0.0071	25.3	0.33	-1
SNORD18	RF00093	TCONS_00003700	334	411	4.9e-07	45.7	0.4	-1
SNORD18	RF00093	TCONS_00033287	329	406	6.2e-07	45.3	0.4	-2
U8	RF00096	TCONS_00033060	99	238	0.0071	27.7	0.34	-1
snoR71	RF00097	TCONS_00002533	7329	7437	3.4e-08	46.8	0.28	-1
snoR71	RF00097	TCONS_00030354	137	35	0.0045	27.2	0.31	-2
snoR24	RF00132	TCONS_00009855	844	936	2.7e-15	77.4	0.45	-1
snoZ223	RF00135	TCONS_00014161	806	898	6.6e-17	79.1	0.37	-1
snoZ223	RF00135	TCONS_00011733	960	1054	3.1e-08	47.1	0.34	-2
snoZ223	RF00135	TCONS_00017483	235	158	6.7e-05	34.8	0.44	-3
snoZ105	RF00145	TCONS_00022094	490	561	6.8e-08	53.5	0.38	-1
snoZ105	RF00145	TCONS_00015426	360	435	7.8e-07	48.7	0.3	-2
snoZ103	RF00149	TCONS_00027268	553	652	6.2e-21	97	0.36	-1
snoZ103	RF00149	TCONS_00027268	301	413	1.6e-15	76.1	0.39	-2
snoZ103	RF00149	TCONS_00027268	1245	1357	6.8e-15	73.7	0.39	-3
SNORD58	RF00151	TCONS_00032515	860	950	0.0003	30.5	0.32	-1
snoZ199	RF00200	TCONS_00003700	151	233	2.1e-13	76	0.3	-1
snoZ199	RF00200	TCONS_00033287	155	237	8.4e-13	73.4	0.3	-2
snoZ278	RF00201	TCONS_00014161	955	1071	9.8e-11	56.2	0.44	-1
snoZ278	RF00201	TCONS_00011733	1141	1259	1.8e-05	36	0.48	-2
snoZ278	RF00201	TCONS_00014161	1182	1299	0.0042	27	0.44	-3
snoR66	RF00202	TCONS_00034109	379	453	6.1e-15	70.1	0.33	-1
snoR66	RF00202	TCONS_00008170	311	385	2e-12	60.8	0.33	-2
snoR160	RF00203	TCONS_00022094	492	566	0.00088	35.8	0.37	-1
snoR41	RF00205	TCONS_00017361	1635	1724	2.1e-12	68	0.39	-1
U54	RF00206	TCONS_00003700	526	614	1.2e-07	48.2	0.37	-1
U54	RF00206	TCONS_00033287	523	611	1.2e-07	48.2	0.37	-2
SNORD38	RF00212	TCONS_00000393	527	605	0.0016	29.2	0.33	-1
snoR64	RF00267	TCONS_00033287	706	802	7.2e-21	93.7	0.3	-1
snoR64	RF00267	TCONS_00003700	706	802	2.7e-19	87.9	0.31	-2
snoR64	RF00267	TCONS_00008383	866	945	0.0037	29	0.3	-3
snoZ7	RF00268	TCONS_00014317	759	830	0.0007	33.3	0.38	-1
snoZ7	RF00268	TCONS_00025617	866	946	0.0056	29.5	0.36	-2
SNORD61	RF00270	TCONS_00014272	210	293	0.003	34.4	0.51	-1
SNORD52	RF00276	TCONS_00026313	391	463	0.00065	29	0.44	-1
snoR16	RF00296	TCONS_00017361	901	985	3.9e-15	81.8	0.35	-1
snoR16	RF00296	TCONS_00017361	531	616	1.7e-14	79.1	0.38	-2
snoR16	RF00296	TCONS_00015471	391	475	1.3e-13	75.5	0.34	-3
snoZ221_snoR21b	RF00300	TCONS_00017361	904	982	0.0026	26.9	0.35	-1
snoZ221_snoR21b	RF00300	TCONS_00017361	534	613	0.0029	26.7	0.39	-2
snoZ178	RF00306	TCONS_00005777	125	32	0.00023	31.2	0.46	-1
snosnR60_Z15	RF00309	TCONS_00013203	1008	1097	1.2e-12	74.5	0.39	-1
snosnR60_Z15	RF00309	TCONS_00005844	809	896	7.5e-11	66.5	0.39	-2
snosnR60_Z15	RF00309	TCONS_00010201	771	858	7.5e-11	66.5	0.39	-3
SNORD53_SNORD92	RF00325	TCONS_00026313	387	464	1.9e-06	40.4	0.46	-1
snoZ155	RF00326	TCONS_00017361	1847	1922	0.00017	39.7	0.37	-1
snoZ161_228	RF00328	TCONS_00015426	172	273	3.7e-11	59.3	0.37	-1
snoZ161_228	RF00328	TCONS_00028957	177	277	1.5e-10	57	0.44	-2
snoZ162	RF00329	TCONS_00022094	489	568	1.7e-05	37.5	0.41	-1
snoZ162	RF00329	TCONS_00015426	653	746	3.2e-05	36.4	0.4	-2
snoZ162	RF00329	TCONS_00015426	359	442	0.00015	33.8	0.31	-3
snoZ43	RF00330	TCONS_00013203	275	372	7.9e-22	94.7	0.48	-1
snoZ43	RF00330	TCONS_00005844	203	303	5.6e-21	91.6	0.47	-2
snoZ43	RF00330	TCONS_00010201	164	264	3.4e-20	88.8	0.46	-3
snoZ43	RF00330	TCONS_00005844	1109	1209	2.2e-17	78.6	0.45	-4
snoZ43	RF00330	TCONS_00010201	1069	1168	3.3e-17	78	0.44	-5
snoZ266	RF00332	TCONS_00028785	575	671	5.2e-09	52.3	0.38	-1
snoZ266	RF00332	TCONS_00028785	794	890	0.0015	31	0.43	-2
snoZ266	RF00332	TCONS_00014317	751	838	0.0025	30.1	0.39	-3
snoZ157	RF00333	TCONS_00026313	383	468	2.3e-13	63.6	0.49	-1
snoZ112	RF00337	TCONS_00014317	235	429	1.1e-09	56.5	0.52	-1
snoZ112	RF00337	TCONS_00025617	269	467	1.6e-09	55.8	0.51	-2
snoZ267	RF00344	TCONS_00019058	453	521	4.7e-11	58.3	0.35	-1
snoR1	RF00345	TCONS_00013203	2062	2160	4e-18	82.2	0.43	-1
snoR1	RF00345	TCONS_00010201	1701	1798	2.8e-15	71.6	0.46	-2
snoR1	RF00345	TCONS_00005844	1738	1835	2.8e-15	71.6	0.46	-3
snoR11	RF00349	TCONS_00026313	616	701	2.5e-16	82.5	0.36	-1
snoR11	RF00349	TCONS_00033287	708	800	0.0088	28.8	0.3	-2
snoR11	RF00349	TCONS_00003700	708	800	0.0088	28.8	0.3	-3
snoZ152	RF00350	TCONS_00026313	754	852	9.1e-15	76.4	0.44	-1
snoR21	RF00352	TCONS_00000393	234	313	1e-09	67.5	0.34	-1
snoR21	RF00352	TCONS_00000393	525	607	3e-07	55.7	0.34	-2
snoR21	RF00352	TCONS_00000393	776	853	4.6e-06	49.9	0.41	-3
snoR31_Z110_Z27	RF00353	TCONS_00032515	857	952	2.1e-07	55.2	0.33	-1
snoR31_Z110_Z27	RF00353	TCONS_00023121	328	422	7.1e-07	52.7	0.35	-2
snoR32_R81	RF00356	TCONS_00023121	123	224	0.00052	40.1	0.39	-1
snoR44_J54	RF00357	TCONS_00019058	569	656	1.8e-17	86.1	0.41	-1
snoZ101	RF00358	TCONS_00014272	590	682	5.6e-17	83.4	0.42	-1
snoZ101	RF00358	TCONS_00014317	753	836	0.0031	30	0.39	-2
snoZ101	RF00358	TCONS_00025617	860	952	0.0058	29	0.38	-3
snoZ107_R87	RF00360	TCONS_00032515	172	282	4.6e-23	100.6	0.46	-1
snoZ107_R87	RF00360	TCONS_00032516	149	249	5.6e-10	51.9	0.47	-2
SNORA7	RF00409	TCONS_00033363	43	150	0.00094	28.3	0.42	-1
HLE	RF00437	TCONS_00014050	289	406	0.00035	33.1	0.34	-1
HLE	RF00437	TCONS_00007361	220	120	0.0029	29	0.3	-2
mir	RF00445	TCONS_00028529	231	328	2.6e-18	71.6	0.39	-1
mir	RF00445	TCONS_00028530	2	94	2.5e-16	65.3	0.44	-2
mir	RF00445	TCONS_00025664	2929	2838	1.1e-14	60.2	0.42	-3
mir	RF00445	TCONS_00025784	49	140	1.1e-14	60.2	0.42	-4
mir	RF00445	TCONS_00028529	328	231	2.1e-13	56.1	0.39	-5
mir	RF00445	TCONS_00028530	94	2	5.2e-12	51.7	0.44	-6
mir	RF00445	TCONS_00025664	2838	2929	1.1e-11	50.7	0.42	-7
mir	RF00445	TCONS_00025784	140	49	1.1e-11	50.7	0.42	-8
mir	RF00445	TCONS_00002451	814	690	1.3e-06	34.7	0.43	-9
mir	RF00445	TCONS_00002451	690	814	3e-06	33.5	0.43	-10
mir	RF00445	TCONS_00025664	1097	999	4.2e-05	29.8	0.38	-11
mir	RF00445	TCONS_00025784	1881	1979	4.2e-05	29.8	0.38	-12
mir	RF00445	TCONS_00025664	999	1097	0.0014	25	0.38	-13
mir	RF00445	TCONS_00025784	1979	1881	0.0014	25	0.38	-14
mir	RF00452	TCONS_00031197	748	890	7.5e-19	82.5	0.45	-1
mir	RF00452	TCONS_00031197	890	748	3.2e-14	65.7	0.45	-2
snosnR61	RF00476	TCONS_00014161	815	874	0.0027	19.5	0.3	-1
IRES_Cx43	RF00487	TCONS_00013464	578	629	0.0094	22	0.38	-1
snoU2	RF00493	TCONS_00003440	1168	1085	0.0072	26.9	0.31	-1
suhB	RF00519	TCONS_00007130	478	522	0.0083	24.8	0.38	-1
snoMe18S	RF00533	TCONS_00031757	267	338	0.0079	27.6	0.32	-1
SgrS	RF00534	TCONS_00027686	1909	2026	0.00088	21.9	0.42	-1
snoCD11	RF00538	TCONS_00012499	182	67	0.0076	27.6	0.34	-1
SNORD86	RF00594	TCONS_00006902	209	296	0.0038	26.3	0.44	-1
SNORD75	RF00612	TCONS_00000393	778	851	7.1e-05	27	0.43	-1
SNORD75	RF00612	TCONS_00000393	236	311	0.0058	21.6	0.36	-2
U6atac	RF00619	TCONS_00030240	195	63	0.0011	23.9	0.35	-1
MIR159	RF00638	TCONS_00001377	1367	1559	1.8e-31	138.8	0.48	-1
MIR159	RF00638	TCONS_00020582	1359	1551	1.8e-31	138.8	0.48	-2
MIR159	RF00638	TCONS_00027686	1966	2160	5.6e-31	136.8	0.47	-3
MIR159	RF00638	TCONS_00031412	755	948	9.4e-29	127.8	0.45	-4
MIR159	RF00638	TCONS_00011415	171	362	1.9e-23	106.5	0.46	-5
MIR159	RF00638	TCONS_00031696	268	4	7.6e-21	96	0.43	-6
MIR159	RF00638	TCONS_00027686	2158	1964	2.4e-19	90.1	0.47	-7
MIR159	RF00638	TCONS_00001377	1557	1365	3.8e-19	89.3	0.48	-8
MIR159	RF00638	TCONS_00020582	1549	1357	3.8e-19	89.3	0.48	-9
MIR159	RF00638	TCONS_00031412	946	753	6.6e-14	68.2	0.46	-10
MIR159	RF00638	TCONS_00011415	360	169	7.8e-14	67.9	0.47	-11
MIR159	RF00638	TCONS_00031696	6	270	1.6e-13	66.7	0.43	-12
MIR159	RF00638	TCONS_00001159	1	97	7.3e-12	60	0.44	-13
MIR159	RF00638	TCONS_00021784	281	345	3.8e-07	41	0.49	-14
MIR159	RF00638	TCONS_00021785	1	42	6.7e-06	36	0.5	-15
MIR159	RF00638	TCONS_00001159	95	1	1e-05	35.3	0.44	-16
MIR159	RF00638	TCONS_00021785	40	1	0.0016	26.4	0.5	-17
MIR167_1	RF00640	TCONS_00006552	287	574	2.7e-18	76.4	0.36	-1
MIR167_1	RF00640	TCONS_00026455	520	663	1.7e-16	70.3	0.38	-2
MIR167_1	RF00640	TCONS_00025594	315	568	1.1e-13	60.7	0.35	-3
MIR167_1	RF00640	TCONS_00019132	211	302	3.1e-12	55.8	0.42	-4
MIR167_1	RF00640	TCONS_00026455	664	521	1.1e-09	47.1	0.38	-5
MIR167_1	RF00640	TCONS_00026454	1	77	1.7e-09	46.5	0.49	-6
MIR167_1	RF00640	TCONS_00019132	303	212	6.9e-09	44.4	0.41	-7
MIR167_1	RF00640	TCONS_00006552	575	288	1.8e-07	39.6	0.37	-8
MIR167_1	RF00640	TCONS_00026454	78	1	7e-05	30.8	0.49	-9
MIR167_1	RF00640	TCONS_00025594	569	316	7.1e-05	30.8	0.36	-10
MIR171_1	RF00643	TCONS_00000284	240	339	5.6e-15	76.8	0.43	-1
MIR171_1	RF00643	TCONS_00022349	121	256	2.5e-14	74.2	0.4	-2
MIR171_1	RF00643	TCONS_00031054	106	209	5.2e-13	68.9	0.42	-3
MIR171_1	RF00643	TCONS_00000284	337	238	2.1e-10	58.4	0.42	-4
MIR171_1	RF00643	TCONS_00031054	207	104	1.1e-09	55.4	0.43	-5
MIR171_1	RF00643	TCONS_00022349	254	119	5.4e-09	52.7	0.4	-6
MIR169_2	RF00645	TCONS_00025112	210	297	3.7e-25	86.2	0.52	-1
MIR169_2	RF00645	TCONS_00001746	70	180	3.6e-24	83.3	0.45	-2
MIR169_2	RF00645	TCONS_00001747	70	180	3.6e-24	83.3	0.45	-3
MIR169_2	RF00645	TCONS_00003722	157	260	1.4e-19	70	0.36	-4
MIR169_2	RF00645	TCONS_00027211	1412	1536	1.6e-18	66.9	0.38	-5
MIR169_2	RF00645	TCONS_00024264	288	521	5.8e-15	56.5	0.31	-6
MIR169_2	RF00645	TCONS_00025112	295	208	4.8e-13	51	0.52	-7
MIR169_2	RF00645	TCONS_00001746	178	68	2.3e-11	46.1	0.45	-8
MIR169_2	RF00645	TCONS_00001747	178	68	2.3e-11	46.1	0.45	-9
MIR169_2	RF00645	TCONS_00027211	1534	1410	6.8e-10	41.8	0.38	-10
MIR169_2	RF00645	TCONS_00003722	254	157	2.4e-09	40.2	0.34	-11
MIR169_2	RF00645	TCONS_00024264	519	286	2.5e-05	28.5	0.31	-12
MIR164	RF00647	TCONS_00019909	21	111	7.5e-18	70.3	0.56	-1
MIR164	RF00647	TCONS_00019909	111	21	9.3e-11	47.4	0.56	-2
MIR396	RF00648	TCONS_00011517	295	407	8e-20	87.2	0.35	-1
MIR396	RF00648	TCONS_00034440	211	323	4.9e-19	84.3	0.39	-2
MIR396	RF00648	TCONS_00005549	455	549	5.8e-19	84.1	0.39	-3
MIR396	RF00648	TCONS_00005550	436	530	5.8e-19	84.1	0.39	-4
MIR396	RF00648	TCONS_00011504	133	255	6.3e-17	76.7	0.45	-5
MIR396	RF00648	TCONS_00034430	115	228	8.4e-16	72.7	0.45	-6
MIR396	RF00648	TCONS_00011517	406	294	3.5e-15	70.5	0.35	-7
MIR396	RF00648	TCONS_00034440	322	210	6.2e-14	65.9	0.4	-8
MIR396	RF00648	TCONS_00005550	529	435	2e-12	60.5	0.4	-9
MIR396	RF00648	TCONS_00005549	548	454	2e-12	60.5	0.4	-10
MIR396	RF00648	TCONS_00011504	254	132	5.4e-09	48.1	0.45	-11
MIR396	RF00648	TCONS_00034430	227	114	3.4e-08	45.3	0.45	-12
MIR396	RF00648	TCONS_00030618	3901	3778	9.1e-07	40.1	0.27	-13
MIR396	RF00648	TCONS_00030618	3779	3902	0.00013	32.4	0.27	-14
MIR394	RF00688	TCONS_00015409	406	561	2.1e-19	89.3	0.38	-1
MIR394	RF00688	TCONS_00015410	406	561	2.1e-19	89.3	0.38	-2
MIR394	RF00688	TCONS_00022359	315	465	2.3e-19	89.1	0.38	-3
MIR394	RF00688	TCONS_00022360	141	291	2.3e-19	89.1	0.38	-4
MIR394	RF00688	TCONS_00015409	561	406	1e-09	52.6	0.38	-5
MIR394	RF00688	TCONS_00015410	561	406	1e-09	52.6	0.38	-6
MIR394	RF00688	TCONS_00022359	465	315	1.3e-09	52.1	0.38	-7
MIR394	RF00688	TCONS_00022360	291	141	1.3e-09	52.1	0.38	-8
MIR390	RF00689	TCONS_00010616	1	157	5e-13	62	0.54	-1
MIR390	RF00689	TCONS_00010616	156	1	2e-08	45.7	0.54	-2
MIR390	RF00689	TCONS_00006980	1	74	7.5e-05	33	0.46	-3
MIR408	RF00690	TCONS_00012735	408	531	4.2e-23	87.7	0.54	-1
MIR408	RF00690	TCONS_00012735	529	407	3.7e-15	61.8	0.54	-2
MIR408	RF00690	TCONS_00019828	929	1042	1.4e-06	33.8	0.39	-3
MIR408	RF00690	TCONS_00019829	929	1042	1.4e-06	33.8	0.39	-4
MIR408	RF00690	TCONS_00019806	356	243	1.4e-06	33.8	0.39	-5
MIR408	RF00690	TCONS_00019828	1178	1291	4.2e-05	29	0.48	-6
MIR408	RF00690	TCONS_00019829	1178	1291	4.2e-05	29	0.48	-7
MIR408	RF00690	TCONS_00034513	744	858	0.001	24.5	0.47	-8
MIR408	RF00690	TCONS_00019806	99	1	0.0022	23.4	0.43	-9
MIR408	RF00690	TCONS_00034513	458	562	0.0052	22.2	0.39	-10
MIR171_2	RF00692	TCONS_00022349	113	261	0.00029	29.1	0.4	-1
MIR397	RF00704	TCONS_00024328	580	471	0.0029	29.3	0.4	-1
MIR397	RF00704	TCONS_00002908	504	443	0.0092	27.4	0.34	-2
mir	RF00705	TCONS_00013405	125	211	0.00059	29.1	0.3	-1
mir	RF00713	TCONS_00003417	2726	2822	0.00035	31.1	0.31	-1
mir	RF00713	TCONS_00003418	2726	2822	0.00035	31.1	0.31	-2
mir	RF00736	TCONS_00002991	557	477	0.00086	31.7	0.26	-1
MIR473	RF00778	TCONS_00014563	238	320	8.2e-12	59	0.48	-1
MIR473	RF00778	TCONS_00014563	321	239	3.4e-08	45.5	0.48	-2
MIR473	RF00778	TCONS_00023459	200	119	0.0012	28.5	0.35	-3
MIR473	RF00778	TCONS_00014563	54	185	0.0023	27.4	0.47	-4
MIR473	RF00778	TCONS_00014563	186	54	0.0047	26.3	0.47	-5
MIR477	RF00780	TCONS_00014563	236	322	1.7e-06	37.7	0.47	-1
MIR477	RF00780	TCONS_00014563	53	186	0.004	26	0.47	-2
mir	RF00796	TCONS_00012735	405	541	0.0053	26.2	0.53	-1
mir	RF00801	TCONS_00033364	15	112	0.0029	26.2	0.27	-1
MIR403	RF00842	TCONS_00033637	165	310	1.7e-14	68.7	0.36	-1
MIR403	RF00842	TCONS_00033637	308	163	3.2e-11	56.8	0.36	-2
MIR169_5	RF00865	TCONS_00027211	1540	1407	6.3e-07	42.9	0.39	-1
MIR169_5	RF00865	TCONS_00025112	204	300	2.8e-05	36.4	0.52	-2
MIR169_5	RF00865	TCONS_00001746	186	63	2.8e-05	36.3	0.44	-3
MIR169_5	RF00865	TCONS_00001747	186	63	2.8e-05	36.3	0.44	-4
MIR169_5	RF00865	TCONS_00025112	301	205	2.9e-05	36.3	0.53	-5
MIR169_5	RF00865	TCONS_00001746	64	183	5e-05	35.4	0.45	-6
MIR169_5	RF00865	TCONS_00001747	64	183	5e-05	35.4	0.45	-7
MIR169_5	RF00865	TCONS_00027211	1406	1539	0.0023	28.7	0.39	-8
MIR821	RF00885	TCONS_00030076	732	460	2.1e-18	87.8	0.29	-1
MIR529	RF00908	TCONS_00012735	416	523	5.5e-05	31.1	0.55	-1
MIR529	RF00908	TCONS_00019828	928	1042	0.00017	29.4	0.4	-2
MIR529	RF00908	TCONS_00019829	928	1042	0.00017	29.4	0.4	-3
MIR529	RF00908	TCONS_00019806	357	243	0.00017	29.4	0.4	-4
MIR529	RF00908	TCONS_00019828	1286	1180	0.0043	24.7	0.47	-5
MIR529	RF00908	TCONS_00019829	1286	1180	0.0043	24.7	0.47	-6
MIR529	RF00908	TCONS_00030788	1036	1155	0.0054	24.3	0.44	-7
MIR529	RF00908	TCONS_00034513	457	565	0.0055	24.3	0.4	-8
mir	RF00918	TCONS_00001313	379	311	0.0078	25.8	0.38	-1
MIR1446	RF00954	TCONS_00014563	229	330	9.3e-07	38.9	0.46	-1
MIR1444	RF00956	TCONS_00024328	574	478	0.00064	31.1	0.38	-1
mir	RF00974	TCONS_00014405	342	433	0.00021	32.9	0.63	-1
mir	RF01013	TCONS_00024328	458	569	0.00017	32.5	0.38	-1
mir	RF01013	TCONS_00019828	943	1039	0.0076	26.3	0.39	-2
mir	RF01013	TCONS_00019829	943	1039	0.0076	26.3	0.39	-3
mir	RF01013	TCONS_00019806	342	246	0.0076	26.3	0.39	-4
mir	RF01013	TCONS_00034513	761	850	0.0097	25.9	0.43	-5
MIR828	RF01026	TCONS_00014626	2825	2734	1.1e-05	39.5	0.39	-1
MIR828	RF01026	TCONS_00014627	2794	2703	1.1e-05	39.5	0.39	-2
MIR828	RF01026	TCONS_00014628	3097	3006	1.1e-05	39.5	0.39	-3
MIR828	RF01026	TCONS_00014629	658	567	1.1e-05	39.5	0.39	-4
mir	RF01059	TCONS_00024328	441	569	1.1e-06	45.1	0.38	-1
mir	RF01059	TCONS_00024328	581	477	4e-06	42.8	0.4	-2
PK	RF01118	TCONS_00013265	2389	2496	2.1e-27	108.4	0.56	-1
snoU18	RF01159	TCONS_00003700	339	408	3.9e-05	25.6	0.37	-1
snoU18	RF01159	TCONS_00033287	334	403	0.00019	23.4	0.37	-2
snoU61	RF01170	TCONS_00014272	208	293	2.2e-13	60.4	0.5	-1
snoR77Y	RF01178	TCONS_00014317	756	836	4.2e-12	63.8	0.4	-1
snoR77Y	RF01178	TCONS_00025617	863	952	1.6e-08	49.8	0.38	-2
snoR77Y	RF01178	TCONS_00014272	593	682	0.0003	33.2	0.42	-3
snoU83	RF01179	TCONS_00005844	586	659	1.3e-09	60.2	0.42	-1
snoU83	RF01179	TCONS_00010201	547	620	1.3e-09	60.2	0.42	-2
snoU83	RF01179	TCONS_00013203	733	806	1.2e-07	51.5	0.38	-3
snoR69Y	RF01198	TCONS_00019949	97	201	1.4e-13	72.2	0.43	-1
snoR99	RF01208	TCONS_00025207	452	558	2.3e-12	77.1	0.38	-1
snR76	RF01209	TCONS_00008170	524	611	3.6e-05	33.4	0.4	-1
snR76	RF01209	TCONS_00034109	563	652	5.8e-05	32.7	0.4	-2
snoR103	RF01213	TCONS_00020595	610	711	7.4e-05	42.5	0.44	-1
snoR97	RF01215	TCONS_00014161	1424	1532	5.4e-16	97.9	0.37	-1
snoR97	RF01215	TCONS_00011733	1593	1701	2.5e-13	84.7	0.35	-2
snoR100	RF01219	TCONS_00025096	234	342	2.7e-19	91	0.41	-1
snoR104	RF01220	TCONS_00031555	87	1	3.1e-10	64.3	0.4	-1
snoR83	RF01227	TCONS_00021912	150	285	1.9e-20	100.9	0.43	-1
snoR111	RF01228	TCONS_00000268	104	229	2.6e-16	86.2	0.43	-1
snoR77	RF01230	TCONS_00005844	2022	2147	4.8e-18	99.8	0.44	-1
snoR77	RF01230	TCONS_00010201	1970	2095	4.8e-18	99.8	0.44	-2
snoR77	RF01230	TCONS_00013203	2344	2448	3.6e-07	50.1	0.48	-3
snR42	RF01265	TCONS_00013405	247	130	0.00089	23.4	0.3	-1
snoR53Y	RF01279	TCONS_00019949	409	497	2.2e-10	58.8	0.34	-1
snoR14	RF01280	TCONS_00014272	368	452	4.1e-19	87.4	0.41	-1
snoR8a	RF01284	TCONS_00030562	211	302	2e-17	88.6	0.47	-1
snoR8a	RF01284	TCONS_00015233	147	239	1.6e-15	80.9	0.42	-2
snoR26	RF01286	TCONS_00031974	198	289	2.2e-14	73.5	0.38	-1
snoR27	RF01287	TCONS_00031974	98	194	7.7e-11	69.5	0.4	-1
snoR31	RF01288	TCONS_00032515	602	700	3.4e-06	46.3	0.36	-1
snoR2	RF01292	TCONS_00025617	523	677	2.6e-25	123.4	0.47	-1
snoR2	RF01292	TCONS_00014317	495	648	4.6e-25	122.4	0.44	-2
SCARNA7	RF01295	TCONS_00011888	1203	1371	7.8e-05	29.1	0.41	-1
SCARNA7	RF01295	TCONS_00006132	1893	2037	0.00024	27.2	0.3	-2
SCARNA7	RF01295	TCONS_00003881	379	291	0.00052	25.8	0.29	-3
SCARNA7	RF01295	TCONS_00011232	78	223	0.00064	25.5	0.32	-4
SCARNA7	RF01295	TCONS_00012223	931	1087	0.00086	25	0.34	-5
SCARNA7	RF01295	TCONS_00029878	580	419	0.0018	23.7	0.46	-6
SCARNA7	RF01295	TCONS_00004208	3099	2987	0.0039	22.4	0.29	-7
SCARNA7	RF01295	TCONS_00005549	533	409	0.0045	22.1	0.42	-8
SCARNA7	RF01295	TCONS_00005550	514	390	0.0045	22.1	0.42	-9
SCARNA7	RF01295	TCONS_00027524	581	430	0.0047	22	0.3	-10
SCARNA7	RF01295	TCONS_00026485	345	172	0.0055	21.7	0.34	-11
SCARNA7	RF01295	TCONS_00034197	1956	2129	0.0057	21.7	0.32	-12
SCARNA7	RF01295	TCONS_00017319	221	363	0.0065	21.4	0.34	-13
snoU49	RF01300	TCONS_00014317	236	300	1.3e-11	59.2	0.48	-1
snoU49	RF01300	TCONS_00025617	270	335	5.8e-11	56.8	0.45	-2
snoU36a	RF01302	TCONS_00014161	641	732	1.9e-18	84.7	0.33	-1
snoU36a	RF01302	TCONS_00011733	794	887	2.4e-13	65.7	0.34	-2
sR52	RF01306	TCONS_00003632	949	899	0.005	25.4	0.45	-1
sR52	RF01306	TCONS_00003633	1608	1558	0.005	25.4	0.45	-2
RSV_RNA	RF01417	TCONS_00016638	1177	993	0.00047	21.7	0.35	-1
IsrR	RF01419	TCONS_00014398	79	1	1.7e-10	58	0.42	-1
snoR116	RF01422	TCONS_00008513	308	396	7.7e-15	72.4	0.38	-1
snoR117	RF01423	TCONS_00008513	121	213	6e-11	54	0.4	-1
snoR117	RF01423	TCONS_00008513	308	397	0.0056	25.6	0.38	-2
snoR117	RF01423	TCONS_00017361	904	983	0.006	25.5	0.35	-3
snoR117	RF01423	TCONS_00019058	1491	1570	0.0086	24.9	0.35	-4
snoR118	RF01424	TCONS_00008170	527	609	2.2e-17	64.8	0.41	-1
snoR118	RF01424	TCONS_00034109	566	650	3.8e-17	64.1	0.4	-2
snoR134	RF01430	TCONS_00014161	253	406	1.5e-23	107.1	0.47	-1
snoR134	RF01430	TCONS_00011733	335	487	1.4e-22	103.2	0.52	-2
snoR134	RF01430	TCONS_00005530	213	365	1.7e-19	90.9	0.49	-3
snoR143	RF01432	TCONS_00023459	121	304	1.2e-24	121.6	0.44	-1
rli40	RF01472	TCONS_00013461	659	474	0.0083	20.9	0.34	-1
Afu_294	RF01506	TCONS_00014272	633	675	0.00033	22.7	0.35	-1
RNase_P	RF01577	TCONS_00021782	306	180	0.00014	39.2	0.26	-1
RNase_P	RF01577	TCONS_00021782	180	306	0.0028	32.8	0.26	-2
RNase_P	RF01577	TCONS_00018864	959	1079	0.0058	31.2	0.31	-3
RNase_P	RF01577	TCONS_00018865	913	1033	0.0058	31.2	0.31	-4
snoR25	RF01600	TCONS_00019036	719	772	0.0036	33.1	0.2	-1
ceN89	RF01662	TCONS_00017361	907	969	0.0093	24.9	0.32	-1
Chlorobi	RF01697	TCONS_00031474	9313	9249	0.00019	31.1	0.2	-1
Flavo	RF01705	TCONS_00032617	1165	1252	0.0055	25.7	0.31	-1
manA	RF01745	TCONS_00013661	520	358	0.0054	21.5	0.39	-1
StyR	RF01830	TCONS_00013265	1	99	7.2e-17	101.3	0.41	-1
enod40	RF01845	TCONS_00017025	229	460	2.9e-21	105.4	0.45	-1
ACEA_U3	RF01848	TCONS_00028092	58	276	6e-10	54.7	0.51	-1
ACEA_U3	RF01848	TCONS_00028093	1	210	1.9e-06	40.2	0.5	-2
tRNA	RF01852	TCONS_00031163	567	642	6.7e-05	34.5	0.55	-1
Afu_455	RF01860	TCONS_00008999	219	269	0.003	19.3	0.29	-1
DLX6	RF01887	TCONS_00028857	1079	957	0.01	17.3	0.34	-1
mir	RF01896	TCONS_00019803	138	59	0.0074	26.4	0.31	-1
MIR2118	RF01911	TCONS_00018715	266	113	2.6e-08	49	0.46	-1
MIR2118	RF01911	TCONS_00018715	113	265	3.8e-08	48.4	0.46	-2
MIR2118	RF01911	TCONS_00019035	362	521	8.1e-08	47	0.44	-3
MIR2118	RF01911	TCONS_00001984	81	218	1.4e-07	46	0.51	-4
MIR2118	RF01911	TCONS_00001985	81	218	1.4e-07	46	0.51	-5
MIR2118	RF01911	TCONS_00018714	370	212	1.4e-06	41.9	0.39	-6
MIR2118	RF01911	TCONS_00018714	213	370	2.2e-06	41.1	0.39	-7
MIR2118	RF01911	TCONS_00001984	219	83	1.3e-05	38	0.52	-8
MIR2118	RF01911	TCONS_00001985	219	83	1.3e-05	38	0.52	-9
MIR2118	RF01911	TCONS_00019036	166	326	3.3e-05	36.3	0.48	-10
MIR2118	RF01911	TCONS_00019679	98	254	6.1e-05	35.2	0.42	-11
MIR2118	RF01911	TCONS_00012735	394	542	0.00016	33.4	0.53	-12
MIR2118	RF01911	TCONS_00012735	542	395	0.00092	30.4	0.53	-13
MIR2118	RF01911	TCONS_00019035	522	359	0.0013	29.7	0.44	-14
MIR2118	RF01911	TCONS_00005777	50	123	0.007	26.7	0.46	-15
bxd_6	RF01934	TCONS_00004486	344	262	0.0063	18.2	0.34	-1
KCNQ1OT1_5	RF01950	TCONS_00001974	2650	2542	0.0042	18.3	0.39	-1
SSU_rRNA_eukarya	RF01960	TCONS_00013264	118	814	6.5e-44	154	0.54	-1
RMST_10	RF01971	TCONS_00013405	199	89	0.0054	18.4	0.25	-1
ZEB2_AS1_4	RF01987	TCONS_00012085	553	479	0.0066	18.7	0.28	-1
ZEB2_AS1_4	RF01987	TCONS_00012086	765	691	0.0066	18.7	0.28	-2
DLEU1_2	RF02104	TCONS_00016233	264	63	0.0035	17.7	0.37	-1
HOXA11	RF02142	TCONS_00008347	289	221	0.005	17.5	0.58	-1
SMAD5	RF02176	TCONS_00001427	6877	6754	0.0079	17.7	0.31	-1
Six3os1_2	RF02247	TCONS_00016167	242	167	0.0015	20	0.49	-1
XIST_intron	RF02266	TCONS_00033008	754	785	0.0097	27.9	0.25	-1
TtnuCD6	RF02283	TCONS_00023121	345	401	0.0085	18	0.44	-1
TtnuCD15	RF02291	TCONS_00026313	402	460	1.5e-06	30.4	0.39	-1
TtnuCD33	RF02307	TCONS_00000031	1520	1583	0.0049	19	0.28	-1
TtnuCD33	RF02307	TCONS_00000032	1512	1575	0.0049	19	0.28	-2
SurA	RF02377	TCONS_00016737	248	511	0.0096	19.2	0.36	-1
snoR125	RF02409	TCONS_00009280	90	373	7.3e-12	56.2	0.38	-1
snoR136	RF02410	TCONS_00010201	2685	2822	5.9e-12	71	0.36	-1
snoR136	RF02410	TCONS_00005844	2737	2869	8.4e-10	61.4	0.39	-2
snoR145	RF02413	TCONS_00034733	388	542	8.7e-13	77.8	0.41	-1
Atu_C9	RF02503	TCONS_00015234	37	93	0.0061	20	0.33	-1
SNOR75	RF02539	TCONS_00022094	277	368	1.6e-17	79.9	0.41	-1
