# Supplementary material for: Regulation of Long Noncoding RNAs Responsive to Phytoplasma Infection in Paulownia tomentosa
Source: Int J Genomics. 2018 Feb 21;2018:3174352. doi: 10.1155/2018/3174352 (PMC5841072; doi:10.1155/2018/3174352)
Supplement: Supplementary 8 — Table S5: lncRNAs predicted as a target of miRNAs. [file 3174352.f8.xlsx]

## Sheet: Sheet1
Table S5 LncRNAs predicted as target of miRNAs
lncRNA	miRNA	Evalue
TCONS_00008342	pt-mir100	0.92
TCONS_00001807	pt-mir101	1.4
TCONS_00025026	pt-mir102	0.74
TCONS_00022927	pt-mir104	0.02
TCONS_00000755	pt-mir105	0.03
TCONS_00026910	pt-mir11	0.71
TCONS_00030158	pt-mir13	0.88
TCONS_00025758	pt-mir14-3p	2.3
TCONS_00004960	pt-miR156a	0.05
TCONS_00004962	pt-miR156a	0.05
TCONS_00019806	pt-miR156a	0.07
TCONS_00019829	pt-miR156a	0.08
TCONS_00034513	pt-miR156a	0.6
TCONS_00023775	pt-miR156b-3p	2.9
TCONS_00004960	pt-miR156b-5p	0.05
TCONS_00019806	pt-miR156b-5p	0.05
TCONS_00019828	pt-miR156b-5p	0.07
TCONS_00019829	pt-miR156b-5p	0.08
TCONS_00034513	pt-miR156b-5p	0.6
TCONS_00023775	pt-miR156c-3p	2.9
TCONS_00004960	pt-miR156c-5p	0.05
TCONS_00004962	pt-miR156c-5p	0.05
TCONS_00019828	pt-miR156c-5p	0.07
TCONS_00019829	pt-miR156c-5p	0.08
TCONS_00034513	pt-miR156c-5p	0.6
TCONS_00019828	pt-miR156d	0.03
TCONS_00019806	pt-miR156d	0.03
TCONS_00004960	pt-miR156d	0.11
TCONS_00004962	pt-miR156d	0.11
TCONS_00034513	pt-miR156d	0.21
TCONS_00019828	pt-miR156e	0.02
TCONS_00019829	pt-miR156e	0.02
TCONS_00034513	pt-miR156e	0.02
TCONS_00004960	pt-miR156e	0.29
TCONS_00004962	pt-miR156e	0.3
TCONS_00010595	pt-miR156e	0.4
TCONS_00028187	pt-miR156e	1.2
TCONS_00019828	pt-miR156f-3p	0.43
TCONS_00019829	pt-miR156f-3p	0.5
TCONS_00034513	pt-miR156f-3p	0.57
TCONS_00019806	pt-miR156f-3p	2
TCONS_00007554	pt-miR156f-3p	2.3
TCONS_00004960	pt-miR156g-5p	0.18
TCONS_00004962	pt-miR156g-5p	0.18
TCONS_00019828	pt-miR156g-5p	0.28
TCONS_00019829	pt-miR156g-5p	0.33
TCONS_00029946	pt-miR156g-5p	1.4
TCONS_00034513	pt-miR156g-5p	2.7
TCONS_00019806	pt-miR156h	0.08
TCONS_00019829	pt-miR156h	0.09
TCONS_00034513	pt-miR156h	0.1
TCONS_00004960	pt-miR156h	0.33
TCONS_00004962	pt-miR156h	0.34
TCONS_00010595	pt-miR156h	1.6
TCONS_00004960	pt-miR156i	0.19
TCONS_00004962	pt-miR156i	0.19
TCONS_00019828	pt-miR156i	0.33
TCONS_00019829	pt-miR156i	0.38
TCONS_00034513	pt-miR156i	2.6
TCONS_00004960	pt-miR156j	0.2
TCONS_00004962	pt-miR156j	0.21
TCONS_00019828	pt-miR156j	0.28
TCONS_00019829	pt-miR156j	0.33
TCONS_00034513	pt-miR156j	2.1
TCONS_00019806	pt-miR156k	0.06
TCONS_00025049	pt-miR156k	0.6
TCONS_00004960	pt-miR156m	0.18
TCONS_00004962	pt-miR156m	0.18
TCONS_00019828	pt-miR156m	0.28
TCONS_00019829	pt-miR156m	0.33
TCONS_00010595	pt-miR156m	1.4
TCONS_00034513	pt-miR156m	2.7
TCONS_00019828	pt-miR156q	0.18
TCONS_00019829	pt-miR156q	0.21
TCONS_00034513	pt-miR156q	0.24
TCONS_00007554	pt-miR156q	0.97
TCONS_00019806	pt-miR156q	2.4
TCONS_00031412	pt-miR159-3p	0.02
TCONS_00030458	pt-miR159-3p	0.38
TCONS_00021785	pt-miR159-3p	0.43
TCONS_00001159	pt-miR159-3p	0.49
TCONS_00011415	pt-miR159-3p	0.63
TCONS_00001377	pt-miR159-3p	1.5
TCONS_00020582	pt-miR159-3p	2.4
TCONS_00027686	pt-miR159-3p	2.8
TCONS_00031412	pt-miR159-5p	0.03
TCONS_00005687	pt-mir16	0.42
TCONS_00005688	pt-mir16	0.42
TCONS_00004239	pt-mir16	1
TCONS_00017319	pt-miR160a-3p	0
TCONS_00017319	pt-miR160a-5p	0.03
TCONS_00000778	pt-miR160a-5p	0.45
TCONS_00017319	pt-miR160b	0.07
TCONS_00000778	pt-miR160b	1.1
TCONS_00017319	pt-miR160c-3p	0
TCONS_00017319	pt-miR160c-5p	0.03
TCONS_00000778	pt-miR160c-5p	0.45
TCONS_00000778	pt-miR160d	0.04
TCONS_00017319	pt-miR160d	0.05
TCONS_00019909	pt-miR164b	0.42
TCONS_00019909	pt-miR164c-5p	0.01
TCONS_00019909	pt-miR164d	0.04
TCONS_00016287	pt-miR165	0.04
TCONS_00016638	pt-miR165	0.08
TCONS_00013043	pt-miR165	0.1
TCONS_00034692	pt-miR165	0.1
TCONS_00014592	pt-miR165	0.12
TCONS_00013936	pt-miR165	0.28
TCONS_00024594	pt-miR165	0.49
TCONS_00016287	pt-miR166a-3p	0.03
TCONS_00016638	pt-miR166a-3p	0.13
TCONS_00013936	pt-miR166a-3p	0.14
TCONS_00013043	pt-miR166a-3p	0.18
TCONS_00034692	pt-miR166a-3p	0.18
TCONS_00014592	pt-miR166a-3p	0.21
TCONS_00012656	pt-miR166a-3p	0.4
TCONS_00004028	pt-miR166a-3p	0.57
TCONS_00009555	pt-miR166a-3p	0.69
TCONS_00016287	pt-miR166a-5p	0.52
TCONS_00016638	pt-miR166a-5p	1.1
TCONS_00013043	pt-miR166a-5p	1.5
TCONS_00034692	pt-miR166a-5p	1.5
TCONS_00014592	pt-miR166a-5p	1.7
TCONS_00016287	pt-miR166b	0.31
TCONS_00016638	pt-miR166b	1.1
TCONS_00013936	pt-miR166b	1.2
TCONS_00013043	pt-miR166b	1.4
TCONS_00034692	pt-miR166b	1.5
TCONS_00014592	pt-miR166b	1.7
TCONS_00016287	pt-miR166c-3p	0.04
TCONS_00012656	pt-miR166c-3p	0.04
TCONS_00004028	pt-miR166c-3p	0.06
TCONS_00009555	pt-miR166c-3p	0.07
TCONS_00016638	pt-miR166c-3p	0.18
TCONS_00013936	pt-miR166c-3p	0.19
TCONS_00013043	pt-miR166c-3p	0.24
TCONS_00034692	pt-miR166c-3p	0.25
TCONS_00014592	pt-miR166c-3p	0.28
TCONS_00004028	pt-miR166c-5p	0.01
TCONS_00016638	pt-miR166c-5p	1.1
TCONS_00012656	pt-miR166d-3p	0.06
TCONS_00016287	pt-miR166d-3p	0.07
TCONS_00004028	pt-miR166d-3p	0.09
TCONS_00009555	pt-miR166d-3p	0.11
TCONS_00016638	pt-miR166d-3p	0.31
TCONS_00013936	pt-miR166d-3p	0.33
TCONS_00013043	pt-miR166d-3p	0.41
TCONS_00034692	pt-miR166d-3p	0.43
TCONS_00014592	pt-miR166d-3p	0.47
TCONS_00031285	pt-miR166d-3p	2.4
TCONS_00016287	pt-miR166e	0.02
TCONS_00016638	pt-miR166e	0.07
TCONS_00013936	pt-miR166e	0.16
TCONS_00013043	pt-miR166e	0.2
TCONS_00034692	pt-miR166e	0.21
TCONS_00014592	pt-miR166e	0.23
TCONS_00012656	pt-miR166e	0.41
TCONS_00004028	pt-miR166e	0.58
TCONS_00009555	pt-miR166e	0.72
TCONS_00016287	pt-miR166f-3p	0.02
TCONS_00016638	pt-miR166f-3p	0.1
TCONS_00013936	pt-miR166f-3p	0.19
TCONS_00013043	pt-miR166f-3p	0.24
TCONS_00034692	pt-miR166f-3p	0.25
TCONS_00014592	pt-miR166f-3p	0.27
TCONS_00004028	pt-miR166f-3p	0.4
TCONS_00012656	pt-miR166f-3p	0.53
TCONS_00009555	pt-miR166f-3p	0.92
TCONS_00016287	pt-miR166f-5p	0.04
TCONS_00016638	pt-miR166f-5p	0.08
TCONS_00013043	pt-miR166f-5p	0.1
TCONS_00034692	pt-miR166f-5p	0.1
TCONS_00014592	pt-miR166f-5p	0.12
TCONS_00013936	pt-miR166f-5p	0.28
TCONS_00024594	pt-miR166f-5p	0.49
TCONS_00016287	pt-miR166g-3p	0.05
TCONS_00012656	pt-miR166g-3p	0.06
TCONS_00004028	pt-miR166g-3p	0.09
TCONS_00009555	pt-miR166g-3p	0.1
TCONS_00016638	pt-miR166g-3p	0.25
TCONS_00013936	pt-miR166g-3p	0.27
TCONS_00013043	pt-miR166g-3p	0.34
TCONS_00034692	pt-miR166g-3p	0.36
TCONS_00014592	pt-miR166g-3p	0.4
TCONS_00009555	pt-miR166g-5p	0.01
TCONS_00012656	pt-miR166g-5p	0.02
TCONS_00022043	pt-miR166g-5p	2
TCONS_00016287	pt-miR166h-3p	0.05
TCONS_00012656	pt-miR166h-3p	0.06
TCONS_00004028	pt-miR166h-3p	0.09
TCONS_00009555	pt-miR166h-3p	0.1
TCONS_00016638	pt-miR166h-3p	0.25
TCONS_00013936	pt-miR166h-3p	0.27
TCONS_00013043	pt-miR166h-3p	0.34
TCONS_00034692	pt-miR166h-3p	0.36
TCONS_00014592	pt-miR166h-3p	0.4
TCONS_00016287	pt-miR166i-3p	0.11
TCONS_00016638	pt-miR166i-3p	0.12
TCONS_00013936	pt-miR166i-3p	0.13
TCONS_00013043	pt-miR166i-3p	0.16
TCONS_00034692	pt-miR166i-3p	0.17
TCONS_00014592	pt-miR166i-3p	0.19
TCONS_00012656	pt-miR166i-3p	0.63
TCONS_00004028	pt-miR166i-3p	1.4
TCONS_00009555	pt-miR166i-3p	2.2
TCONS_00016638	pt-miR166i-5p	0.01
TCONS_00013043	pt-miR166i-5p	0.01
TCONS_00034692	pt-miR166i-5p	0.01
TCONS_00014592	pt-miR166i-5p	0.01
TCONS_00013936	pt-miR166i-5p	0.02
TCONS_00024594	pt-miR166i-5p	0.14
TCONS_00004028	pt-miR166i-5p	0.36
TCONS_00016287	pt-miR166i-5p	1.5
TCONS_00012656	pt-miR166j-3p	0.06
TCONS_00009555	pt-miR166j-3p	0.1
TCONS_00016638	pt-miR166j-3p	0.11
TCONS_00016287	pt-miR166j-3p	0.21
TCONS_00029299	pt-miR166j-3p	0.68
TCONS_00034692	pt-miR166j-3p	0.97
TCONS_00014592	pt-miR166j-3p	1.1
TCONS_00004028	pt-miR166j-3p	1.1
TCONS_00013936	pt-miR166j-3p	1.6
TCONS_00013043	pt-miR166j-3p	2
TCONS_00016638	pt-miR166j-5p	0.03
TCONS_00013936	pt-miR166j-5p	0.07
TCONS_00013043	pt-miR166j-5p	0.07
TCONS_00034692	pt-miR166j-5p	0.08
TCONS_00014592	pt-miR166j-5p	0.09
TCONS_00004028	pt-miR166j-5p	0.12
TCONS_00024594	pt-miR166j-5p	0.95
TCONS_00016287	pt-miR166k-3p	0.05
TCONS_00016638	pt-miR166k-3p	0.22
TCONS_00013936	pt-miR166k-3p	0.24
TCONS_00013043	pt-miR166k-3p	0.29
TCONS_00034692	pt-miR166k-3p	0.31
TCONS_00014592	pt-miR166k-3p	0.34
TCONS_00012656	pt-miR166k-3p	0.78
TCONS_00004028	pt-miR166k-3p	1.1
TCONS_00009555	pt-miR166k-3p	1.4
TCONS_00034692	pt-miR166k-5p	0.01
TCONS_00014592	pt-miR166k-5p	0.01
TCONS_00016638	pt-miR166k-5p	0.02
TCONS_00032865	pt-miR166k-5p	0.02
TCONS_00013936	pt-miR166k-5p	0.06
TCONS_00024594	pt-miR166k-5p	0.43
TCONS_00004028	pt-miR166k-5p	1.1
TCONS_00026454	pt-miR167a	0.22
TCONS_00026455	pt-miR167a	0.22
TCONS_00019132	pt-miR167a	0.26
TCONS_00006552	pt-miR167a	0.66
TCONS_00026455	pt-miR167b	0.02
TCONS_00019132	pt-miR167b	0.03
TCONS_00006552	pt-miR167b	0.16
TCONS_00026454	pt-miR167b	0.52
TCONS_00025594	pt-miR167b	1.2
TCONS_00019132	pt-miR167c-3p	0.04
TCONS_00006552	pt-miR167c-5p	0.08
TCONS_00026455	pt-miR167c-5p	0.1
TCONS_00019132	pt-miR167c-5p	0.12
TCONS_00025594	pt-miR167c-5p	0.51
TCONS_00026454	pt-miR167c-5p	0.9
TCONS_00026455	pt-miR167d-5p	0.12
TCONS_00019132	pt-miR167d-5p	0.14
TCONS_00025594	pt-miR167d-5p	0.65
TCONS_00026454	pt-miR167d-5p	0.72
TCONS_00006552	pt-miR167d-5p	0.85
TCONS_00026455	pt-miR167e-3p	0.02
TCONS_00026455	pt-miR167e-5p	0.01
TCONS_00019132	pt-miR167e-5p	0.04
TCONS_00006552	pt-miR167e-5p	0.21
TCONS_00026454	pt-miR167e-5p	0.7
TCONS_00025594	pt-miR167e-5p	1.6
TCONS_00026454	pt-miR167f	0.03
TCONS_00006552	pt-miR167g	0.04
TCONS_00026455	pt-miR167g	0.19
TCONS_00019132	pt-miR167g	0.22
TCONS_00025594	pt-miR167g	0.24
TCONS_00025128	pt-miR167g	1.5
TCONS_00026454	pt-miR167g	1.6
TCONS_00022415	pt-miR168a	0.01
TCONS_00010083	pt-miR168a	0.02
TCONS_00025112	pt-miR169a-3p	0.01
TCONS_00001746	pt-miR169a-3p	0.01
TCONS_00001747	pt-miR169a-3p	0.01
TCONS_00012825	pt-miR169a-3p	1.4
TCONS_00003722	pt-miR169a-5p	0.01
TCONS_00001746	pt-miR169a-5p	0.01
TCONS_00001747	pt-miR169a-5p	0.01
TCONS_00025112	pt-miR169a-5p	0.03
TCONS_00024264	pt-miR169a-5p	0.04
TCONS_00012614	pt-miR169a-5p	0.97
TCONS_00027211	pt-miR169a-5p	1.5
TCONS_00025112	pt-miR169b-3p	0.01
TCONS_00001746	pt-miR169b-3p	0.01
TCONS_00001747	pt-miR169b-3p	0.01
TCONS_00012825	pt-miR169b-3p	1.4
TCONS_00024264	pt-miR169b-5p	0.01
TCONS_00003722	pt-miR169b-5p	0.01
TCONS_00025112	pt-miR169b-5p	0.02
TCONS_00001746	pt-miR169b-5p	0.02
TCONS_00001747	pt-miR169b-5p	0.02
TCONS_00027211	pt-miR169b-5p	2.5
TCONS_00024264	pt-miR169d	1
TCONS_00025112	pt-miR169d	1.1
TCONS_00003722	pt-miR169d	1.2
TCONS_00001746	pt-miR169d	1.2
TCONS_00001747	pt-miR169d	1.4
TCONS_00024264	pt-miR169f	0.07
TCONS_00003722	pt-miR169f	0.08
TCONS_00025112	pt-miR169f	0.12
TCONS_00001746	pt-miR169f	0.13
TCONS_00001747	pt-miR169f	0.15
TCONS_00011754	pt-miR169f	1.7
TCONS_00020635	pt-miR169g	1.5
TCONS_00031054	pt-miR171a-3p	0.03
TCONS_00000284	pt-miR171a-3p	1.5
TCONS_00031054	pt-miR171a-5p	0
TCONS_00019943	pt-miR171a-5p	1.5
TCONS_00031054	pt-miR171b-3p	0.03
TCONS_00000284	pt-miR171b-3p	1.5
TCONS_00031054	pt-miR171b-5p	0
TCONS_00019943	pt-miR171b-5p	1.5
TCONS_00022349	pt-miR171c-3p	0.01
TCONS_00000284	pt-miR171c-3p	0.02
TCONS_00031054	pt-miR171c-3p	0.06
TCONS_00014406	pt-miR171c-3p	1.6
TCONS_00000284	pt-miR171c-5p	0.01
TCONS_00022349	pt-miR171d-3p	0.01
TCONS_00000284	pt-miR171d-3p	0.02
TCONS_00031054	pt-miR171d-3p	0.06
TCONS_00014406	pt-miR171d-3p	1.6
TCONS_00000284	pt-miR171d-5p	0.01
TCONS_00022349	pt-miR171e	0.01
TCONS_00000284	pt-miR171e	0.02
TCONS_00031054	pt-miR171e	0.06
TCONS_00014406	pt-miR171e	1.6
TCONS_00022349	pt-miR171f	0.01
TCONS_00000284	pt-miR171f	0.02
TCONS_00031054	pt-miR171f	0.06
TCONS_00014406	pt-miR171f	1.6
TCONS_00022349	pt-miR171h	0.02
TCONS_00031197	pt-miR172a	0.11
TCONS_00008093	pt-miR172a	1.3
TCONS_00031197	pt-miR172b	0.23
TCONS_00005027	pt-mir17-3p	2.4
TCONS_00001889	pt-mir17-3p	2.9
TCONS_00008342	pt-mir18-3p	0.01
TCONS_00008342	pt-mir18-5p	0.02
TCONS_00000284	pt-mir18-5p	1.8
TCONS_00014179	pt-mir18-5p	2.1
TCONS_00018415	pt-mir19-3p	0.26
TCONS_00026657	pt-mir19-5p	0.99
TCONS_00030987	pt-mir20	2.2
TCONS_00023162	pt-mir20	2.4
TCONS_00010192	pt-mir20	2.7
TCONS_00032421	pt-miR2111a	0.01
TCONS_00019036	pt-mir21-3p	0.69
TCONS_00019679	pt-mir21-3p	0.7
TCONS_00019036	pt-mir21-5p	0.52
TCONS_00008267	pt-mir21-5p	1.7
TCONS_00019035	pt-mir21-5p	1.7
TCONS_00019679	pt-mir21-5p	2.1
TCONS_00010589	pt-mir21-5p	2.3
TCONS_00030616	pt-mir22	0.31
TCONS_00027769	pt-mir23-3p	0.01
TCONS_00032346	pt-mir23-3p	1
TCONS_00005378	pt-mir23-3p	1.7
TCONS_00027769	pt-mir23-5p	0
TCONS_00032346	pt-mir23-5p	0.03
TCONS_00024480	pt-mir24	1.8
TCONS_00026130	pt-mir25	0.59
TCONS_00026910	pt-mir25	1.8
TCONS_00010213	pt-mir26-5p	2.9
TCONS_00033574	pt-mir27	2.6
TCONS_00004238	pt-mir29	0.82
TCONS_00008934	pt-mir29	1.5
TCONS_00014137	pt-mir29	3
TCONS_00009176	pt-mir2a	0.06
TCONS_00009062	pt-mir2a	0.57
TCONS_00009611	pt-mir2a	1
TCONS_00032941	pt-mir30-3p	0.01
TCONS_00018322	pt-mir30-3p	0.04
TCONS_00014982	pt-mir30-3p	0.05
TCONS_00027841	pt-mir30-3p	2.4
TCONS_00018322	pt-mir30-5p	0.01
TCONS_00032941	pt-mir30-5p	0.43
TCONS_00022439	pt-mir30-5p	0.65
TCONS_00021785	pt-miR319a-3p	0.01
TCONS_00001159	pt-miR319a-3p	0.01
TCONS_00011415	pt-miR319a-3p	0.02
TCONS_00001377	pt-miR319a-3p	0.04
TCONS_00020582	pt-miR319a-3p	0.06
TCONS_00027686	pt-miR319a-3p	0.58
TCONS_00001377	pt-miR319a-5p	0.11
TCONS_00020582	pt-miR319a-5p	0.18
TCONS_00027686	pt-miR319a-5p	0.21
TCONS_00021785	pt-miR319b-3p	0.03
TCONS_00001159	pt-miR319b-3p	0.03
TCONS_00011415	pt-miR319b-3p	0.04
TCONS_00027686	pt-miR319b-3p	0.07
TCONS_00001377	pt-miR319b-3p	0.09
TCONS_00020582	pt-miR319b-3p	0.14
TCONS_00021785	pt-miR319c-3p	0.01
TCONS_00001159	pt-miR319c-3p	0.01
TCONS_00011415	pt-miR319c-3p	0.02
TCONS_00001377	pt-miR319c-3p	0.04
TCONS_00020582	pt-miR319c-3p	0.06
TCONS_00027686	pt-miR319c-3p	0.58
TCONS_00001377	pt-miR319c-5p	0.11
TCONS_00020582	pt-miR319c-5p	0.18
TCONS_00027686	pt-miR319c-5p	0.21
TCONS_00001377	pt-miR319d-5p	0.07
TCONS_00020582	pt-miR319d-5p	0.12
TCONS_00027686	pt-miR319d-5p	0.28
TCONS_00021785	pt-miR319e-3p	0.01
TCONS_00001159	pt-miR319e-3p	0.01
TCONS_00011415	pt-miR319e-3p	0.01
TCONS_00001377	pt-miR319e-3p	0.06
TCONS_00020582	pt-miR319e-3p	0.1
TCONS_00002304	pt-miR319e-3p	0.42
TCONS_00027686	pt-miR319e-3p	1
TCONS_00021785	pt-miR319g	0.02
TCONS_00001159	pt-miR319g	0.02
TCONS_00011415	pt-miR319g	0.03
TCONS_00027686	pt-miR319g	0.04
TCONS_00001377	pt-miR319g	0.07
TCONS_00020582	pt-miR319g	0.11
TCONS_00021785	pt-miR319h	0.02
TCONS_00001159	pt-miR319h	0.02
TCONS_00011415	pt-miR319h	0.03
TCONS_00001377	pt-miR319h	0.07
TCONS_00020582	pt-miR319h	0.11
TCONS_00027686	pt-miR319h	1
TCONS_00021785	pt-miR319i	0.01
TCONS_00001159	pt-miR319i	0.01
TCONS_00011415	pt-miR319i	0.02
TCONS_00001377	pt-miR319i	0.04
TCONS_00020582	pt-miR319i	0.06
TCONS_00027686	pt-miR319i	0.63
TCONS_00021785	pt-miR319k	0.15
TCONS_00001159	pt-miR319k	0.2
TCONS_00011415	pt-miR319k	0.26
TCONS_00027686	pt-miR319k	0.59
TCONS_00001377	pt-miR319k	0.62
TCONS_00020582	pt-miR319k	0.97
TCONS_00031696	pt-miR319k	2.2
TCONS_00021785	pt-miR319l	0.02
TCONS_00001159	pt-miR319l	0.02
TCONS_00011415	pt-miR319l	0.03
TCONS_00027686	pt-miR319l	0.04
TCONS_00001377	pt-miR319l	0.07
TCONS_00020582	pt-miR319l	0.11
TCONS_00016047	pt-mir32-3p	2.1
TCONS_00034613	pt-mir33-5p	0.49
TCONS_00034612	pt-mir33-5p	0.5
TCONS_00030205	pt-mir34-5p	0.05
TCONS_00003750	pt-mir34-5p	0.39
TCONS_00028278	pt-mir35	2.8
TCONS_00030199	pt-miR3627	2.1
TCONS_00019058	pt-miR3630	0.04
TCONS_00016720	pt-miR3630	2.8
TCONS_00022226	pt-mir36-3p	0
TCONS_00004798	pt-mir37-3p	2.7
TCONS_00029026	pt-mir37-5p	1.6
TCONS_00007981	pt-mir38	3
TCONS_00019870	pt-mir39	1.7
TCONS_00032862	pt-mir39	2.8
TCONS_00034179	pt-mir39	3
TCONS_00010616	pt-miR390a	0.03
TCONS_00006980	pt-miR390a	0.55
TCONS_00010616	pt-miR390b	0.01
TCONS_00009404	pt-miR390b	2.5
TCONS_00010781	pt-miR391	1.9
TCONS_00015409	pt-miR394a	0.3
TCONS_00015410	pt-miR394a	0.38
TCONS_00022359	pt-miR394a	0.43
TCONS_00022360	pt-miR394a	0.44
TCONS_00015409	pt-miR394c	0.01
TCONS_00015410	pt-miR394c	0.01
TCONS_00022359	pt-miR394c	0.01
TCONS_00022360	pt-miR394c	0.01
TCONS_00009915	pt-miR395e	2.6
TCONS_00033648	pt-miR395e	2.8
TCONS_00005550	pt-miR396a-3p	0.02
TCONS_00005549	pt-miR396a-3p	0.04
TCONS_00011517	pt-miR396a-3p	2.2
TCONS_00005550	pt-miR396a-5p	0.12
TCONS_00011517	pt-miR396a-5p	0.14
TCONS_00005549	pt-miR396a-5p	0.2
TCONS_00034440	pt-miR396a-5p	0.21
TCONS_00034430	pt-miR396a-5p	0.39
TCONS_00011504	pt-miR396a-5p	0.41
TCONS_00011517	pt-miR396b-3p	0.09
TCONS_00034440	pt-miR396b-3p	0.14
TCONS_00005550	pt-miR396b-3p	1.9
TCONS_00034430	pt-miR396b-3p	2.3
TCONS_00011504	pt-miR396b-3p	2.4
TCONS_00034430	pt-miR396c-3p	0.02
TCONS_00011504	pt-miR396c-3p	0.02
TCONS_00005550	pt-miR396c-3p	0.05
TCONS_00005549	pt-miR396c-3p	0.09
TCONS_00011517	pt-miR396c-3p	0.39
TCONS_00034440	pt-miR396c-3p	0.6
TCONS_00027993	pt-miR396c-3p	2.4
TCONS_00034430	pt-miR396c-5p	0.12
TCONS_00011504	pt-miR396c-5p	0.13
TCONS_00005550	pt-miR396c-5p	0.32
TCONS_00011517	pt-miR396c-5p	0.39
TCONS_00005549	pt-miR396c-5p	0.56
TCONS_00034440	pt-miR396c-5p	0.59
TCONS_00006031	pt-miR396c-5p	2.7
TCONS_00005550	pt-miR396e-5p	0.17
TCONS_00011517	pt-miR396e-5p	0.2
TCONS_00005549	pt-miR396e-5p	0.29
TCONS_00034440	pt-miR396e-5p	0.31
TCONS_00034430	pt-miR396e-5p	0.57
TCONS_00011504	pt-miR396e-5p	0.59
TCONS_00003722	pt-miR397a	1.1
TCONS_00003722	pt-miR397c	1.3
TCONS_00028530	pt-miR399a	0.03
TCONS_00028529	pt-miR399a	0.03
TCONS_00025784	pt-miR399a	0.05
TCONS_00028530	pt-miR399b	0.49
TCONS_00028529	pt-miR399b	0.57
TCONS_00025784	pt-miR399b	0.95
TCONS_00028530	pt-miR399c	0.24
TCONS_00028529	pt-miR399c	0.33
TCONS_00025784	pt-miR399c	0.48
TCONS_00002451	pt-miR399c	1.7
TCONS_00028530	pt-miR399e	0.01
TCONS_00025784	pt-miR399e	0.02
TCONS_00028529	pt-miR399e	0.52
TCONS_00028530	pt-miR399f	0.17
TCONS_00028529	pt-miR399f	0.23
TCONS_00025784	pt-miR399f	0.33
TCONS_00033637	pt-miR403	0.1
TCONS_00012735	pt-miR408a-3p	0.26
TCONS_00012735	pt-miR408a-5p	0.03
TCONS_00013725	pt-miR408a-5p	2.6
TCONS_00012735	pt-miR408b	3
TCONS_00004266	pt-mir42-5p	2.4
TCONS_00010288	pt-mir44	2.1
TCONS_00011415	pt-miR4414-3p	0.07
TCONS_00011415	pt-miR4414-5p	0.01
TCONS_00015679	pt-miR4414-5p	2.2
TCONS_00004978	pt-miR4414-5p	2.6
TCONS_00032099	pt-miR4414-5p	2.7
TCONS_00011249	pt-mir45	2.6
TCONS_00019183	pt-mir45	2.8
TCONS_00006265	pt-mir46-3p	2.4
TCONS_00024939	pt-mir47-5p	3
TCONS_00014563	pt-miR477a	0.15
TCONS_00022295	pt-miR477a	0.63
TCONS_00019035	pt-miR482a-3p	1
TCONS_00019035	pt-miR482a-5p	0.03
TCONS_00019679	pt-miR482a-5p	0.29
TCONS_00011782	pt-miR482a-5p	0.65
TCONS_00019036	pt-miR482a-5p	0.72
TCONS_00018714	pt-miR482b	1.2
TCONS_00018715	pt-miR482c	0.74
TCONS_00019036	pt-miR482d	2.5
TCONS_00019679	pt-miR482d	2.6
TCONS_00001985	pt-miR482e	0.88
TCONS_00001984	pt-miR482e	0.95
TCONS_00000821	pt-mir49	1
TCONS_00031757	pt-miR4995b	2.7
TCONS_00007392	pt-mir51-5p	2.3
TCONS_00004597	pt-miR5368Aa-3p	2.6
TCONS_00031807	pt-miR5368Ab-3p	1.1
TCONS_00002922	pt-miR5368Aj	2.1
TCONS_00018300	pt-miR5368c-5p	1.2
TCONS_00000661	pt-miR5368c-5p	1.3
TCONS_00018918	pt-miR5368c-5p	3
TCONS_00012084	pt-miR5368e-3p	1.7
TCONS_00008267	pt-miR5368e-5p	2
TCONS_00027155	pt-miR5368i-3p	1.9
TCONS_00000661	pt-miR5368i-3p	2.8
TCONS_00011206	pt-miR5368j-3p	2.8
TCONS_00012868	pt-miR5368j-3p	3
TCONS_00027155	pt-miR5368l-3p	1.9
TCONS_00000661	pt-miR5368l-3p	2.6
TCONS_00031566	pt-miR5368n-3p	2.4
TCONS_00020943	pt-miR5368s-3p	1.7
TCONS_00008267	pt-miR5368v-3p	2
TCONS_00016049	pt-miR5368v-5p	2.9
TCONS_00031906	pt-mir55	2.1
TCONS_00010915	pt-mir55	2.9
TCONS_00025420	pt-mir56	0.37
TCONS_00007768	pt-mir57	0.83
TCONS_00009904	pt-mir58	0.79
TCONS_00029792	pt-mir59	1.4
TCONS_00002153	pt-mir60	1.3
TCONS_00007252	pt-miR6173e-5p	1.5
TCONS_00004911	pt-miR6173g-5p	2.6
TCONS_00026491	pt-miR6173l	1.9
TCONS_00008211	pt-mir62	1.1
TCONS_00018765	pt-mir62	1.3
TCONS_00005510	pt-mir63	2.8
TCONS_00032639	pt-miR6300a	0.75
TCONS_00032639	pt-miR6300b	1.5
TCONS_00032639	pt-miR6300d	2.3
TCONS_00032639	pt-miR6300f	0.89
TCONS_00032639	pt-miR6300h	0.8
TCONS_00025812	pt-miR6424	0.1
TCONS_00007831	pt-miR6478c	2.9
TCONS_00033637	pt-mir65	0.01
TCONS_00025576	pt-mir66	2.3
TCONS_00018714	pt-mir67	0.04
TCONS_00018715	pt-mir67	0.35
TCONS_00003413	pt-mir68	0.76
TCONS_00019973	pt-mir68	2.5
TCONS_00019972	pt-mir68	2.7
TCONS_00019971	pt-mir68	2.7
TCONS_00003862	pt-mir7	0.06
TCONS_00015830	pt-mir7	1.6
TCONS_00032421	pt-mir71	0.04
TCONS_00023162	pt-mir72	1.2
TCONS_00018794	pt-mir72	2.5
TCONS_00017819	pt-mir74	1.7
TCONS_00015959	pt-mir75	0.39
TCONS_00031163	pt-mir75	3
TCONS_00026910	pt-mir78	0.28
TCONS_00013595	pt-mir8	0.02
TCONS_00021857	pt-mir8	0.12
TCONS_00024379	pt-mir8	1.4
TCONS_00018714	pt-mir80	0.51
TCONS_00023868	pt-miR8005-3p	0.28
TCONS_00023868	pt-miR8005-5p	0.37
TCONS_00021694	pt-miR8016	0.49
TCONS_00029210	pt-miR8016	1.5
TCONS_00027524	pt-miR8016	3
TCONS_00020606	pt-miR821	0.08
TCONS_00032413	pt-miR821	0.99
TCONS_00023875	pt-miR821	1
TCONS_00003752	pt-mir84	2.2
TCONS_00010762	pt-mir85	1.3
TCONS_00007511	pt-miR858a	0.01
TCONS_00006132	pt-miR858a	0.02
TCONS_00006131	pt-miR858a	0.05
TCONS_00007511	pt-miR858c	0.04
TCONS_00006132	pt-miR858c	0.07
TCONS_00006131	pt-miR858c	0.17
TCONS_00023868	pt-miR8674	0.43
TCONS_00009511	pt-mir87	2
TCONS_00009553	pt-mir87	2
TCONS_00014325	pt-mir88	2.1
TCONS_00016813	pt-mir88	2.5
TCONS_00006851	pt-mir9	0.07
TCONS_00014404	pt-mir9	1.4
TCONS_00010755	pt-mir90	0.03
TCONS_00013765	pt-mir90	0.35
TCONS_00006804	pt-mir90	1.1
TCONS_00032413	pt-mir91	0.45
TCONS_00009355	pt-mir91	1.9
TCONS_00008488	pt-mir94	0.65
TCONS_00001596	pt-mir94	1.6
TCONS_00029822	pt-mir96	2.4
TCONS_00005783	pt-mir97	0.45
TCONS_00022990	pt-mir97	2.5
TCONS_00023452	pt-mir97	2.8
TCONS_00007992	pt-mir98	1.9
TCONS_00016465	pt-mir98	2.3
