# Supplementary material for: Regulation of Long Noncoding RNAs Responsive to Phytoplasma Infection in Paulownia tomentosa
Source: Int J Genomics. 2018 Feb 21;2018:3174352. doi: 10.1155/2018/3174352 (PMC5841072; doi:10.1155/2018/3174352)
Supplement: Supplementary 9 — Table S6: lncRNAs predicted as target mimicry of miRNAs. [file 3174352.f9.xlsx]

## Sheet: Sheet1
Table S6 LncRNAs predicted as target mimicry of miRNAs
lncRNA	miRNA
TCONS_00019806	pt-miR156a
TCONS_00019806	pt-miR156b-5p
TCONS_00019806	pt-miR156c-5p
TCONS_00019806	pt-miR156d
TCONS_00019806	pt-miR156f-3p
TCONS_00019806	pt-miR156g-5p
TCONS_00029946	pt-miR156g-5p
TCONS_00019806	pt-miR156h
TCONS_00004962	pt-miR156i
TCONS_00034513	pt-miR156m
TCONS_00019829	pt-miR156m
TCONS_00016549	pt-miR156n
TCONS_00032865	pt-miR166k-5p
TCONS_00014406	pt-miR171c-3p
TCONS_00022349	pt-miR171d-3p
TCONS_00000284	pt-miR171e
TCONS_00000284	pt-miR171f
TCONS_00032421	pt-miR2111a
TCONS_00018322	pt-mir30-5p
TCONS_00032941	pt-mir30-5p
TCONS_00021785	pt-miR319a-3p
TCONS_00021785	pt-miR319c-3p
TCONS_00021785	pt-miR319i
TCONS_00024939	pt-mir47-5p
TCONS_00031807	pt-miR5368Ab-3p
TCONS_00018918	pt-miR5368c-5p
TCONS_00012868	pt-miR5368j-3p
TCONS_00027511	pt-miR5368i-3p
TCONS_00020943	pt-miR5368s-5p
TCONS_00008267	pt-miR5368v-5p
TCONS_00012868	pt-miR5368x-5p
TCONS_00007252	pt-miR6173e-5p
TCONS_00004911	pt-miR6173e-5p
TCONS_00018714	pt-mir67
TCONS_00017819	pt-mir74
TCONS_00026910	pt-mir78
TCONS_00032413	pt-mir91
TCONS_00029822	pt-mir96
