# Supplementary material for: Regulation of Long Noncoding RNAs Responsive to Phytoplasma Infection in Paulownia tomentosa
Source: Int J Genomics. 2018 Feb 21;2018:3174352. doi: 10.1155/2018/3174352 (PMC5841072; doi:10.1155/2018/3174352)
Supplement: Supplementary 10 — Table S7: lncRNAs related to PaWB. [file 3174352.f10.xlsx]

## Sheet: Sheet1
Table S7 LncRNAs related to PaWB
geneID	geneLength	class-code	log2 Ratio(PTI vs PT)	log2 Ratio(PTI-MMS vs PTI)	log2 Ratio(PT-MMS vs PT)
TCONS_00022921	1892	antisense lncRNA	9.7	-7.17	-
TCONS_00026766	1408	antisense lncRNA	8.7	-	9.97
TCONS_00021207	1783	antisense lncRNA	-1.08	1.01	-
TCONS_00007588	1712	antisense lncRNA	3.75	-3.56	-
TCONS_00019747	1850	antisense lncRNA	3.12	1.53	-
TCONS_00019526	6918	antisense lncRNA	2.92	-	4.69
TCONS_00026473	1749	antisense lncRNA	1.7	-	1.61
TCONS_00004208	8134	antisense lncRNA	-19.5	14.34	-
TCONS_00014627	6937	antisense lncRNA	-11.69	-	1.63
TCONS_00003915	2189	antisense lncRNA	-3.61	-	-2.76
TCONS_00029947	1520	antisense lncRNA	-3.24177	-	-2.14
TCONS_00032941	1152	antisense lncRNA	-3.18	2.1	-
TCONS_00004207	7639	antisense lncRNA	-3.14	-	1.65
TCONS_00013407	2873	antisense lncRNA	-2.37	-	-2.68
TCONS_00008675	7935	antisense lncRNA	-2.12	-	1.12
TCONS_00008619	1529	antisense lncRNA	-1.90107	-	-1.6
TCONS_00026765	1581	antisense lncRNA	-1.83	-	-
TCONS_00009553	1523	antisense lncRNA	-1.7951	-	-2.16378
TCONS_00003439	1320	antisense lncRNA	-1.75	1.65	-
TCONS_00012149	1943	antisense lncRNA	-1.7	-	-2.81
TCONS_00016270	547	antisense lncRNA	-1.65	-	-1.84
TCONS_00007407	1655	antisense lncRNA	-1.6	-	-1.04
TCONS_00008676	3547	antisense lncRNA	-1.56	-	1.18
TCONS_00002625	1635	antisense lncRNA	-1.46	-	-
TCONS_00006812	1948	antisense lncRNA	-1.44	-	-3.11
TCONS_00002102	4453	antisense lncRNA	-1.44	-	-47.11
TCONS_00006109	2540	antisense lncRNA	-1.28	-	1.06
TCONS_00029756	2951	antisense lncRNA	-1.26	-	-1.59
TCONS_00010595	2955	antisense lncRNA	-1.26	-	-1.11
TCONS_00031818	1357	antisense lncRNA	-1.23044	-	-1.8
TCONS_00009511	1501	antisense lncRNA	-1.17	-	-1.56
TCONS_00024489	1545	antisense lncRNA	-1.1	-	-1.72
TCONS_00029214	2189	intergenic lncRNA	15.29	-10.8	-
TCONS_00022230	3526	intergenic lncRNA	-2.96	1.09	-
TCONS_00019972	3442	intergenic lncRNA	14.32	-11.17	-
TCONS_00007978	1997	intergenic lncRNA	13.75		15.5
TCONS_00019830	849	intergenic lncRNA	6.47	-17.2	-
TCONS_00027211	2674	intergenic lncRNA	6.21	-1.18	-
TCONS_00013162	1251	intergenic lncRNA	6.18	1.84	-
TCONS_00013163	413	intergenic lncRNA	3.27	-	-
TCONS_00028666	1737	intergenic lncRNA	5.07	-	4.91
TCONS_00020981	1311	intergenic lncRNA	4.58	-9.01	-
TCONS_00019891	926	intergenic lncRNA	4.48	-1.17	-
TCONS_00019892	1141	intergenic lncRNA	4.43	-1.27	-
TCONS_00012089	1505	intergenic lncRNA	4.34	-2.04	-
TCONS_00019894	2488	intergenic lncRNA	-1.26	1.12	1.36
TCONS_00034513	2127	intergenic lncRNA	1.75	-4.05
TCONS_00005711	542	intergenic lncRNA	-4.54	1.63	-
TCONS_00030528	5929	intergenic lncRNA	-18.74	17.54	-
TCONS_00034667	549	intergenic lncRNA	-16.53	-	-2.96
TCONS_00020881	364	intergenic lncRNA	-16.44	-	-3.87
TCONS_00022359	2271	intergenic lncRNA	-15.83	-	-1.83
TCONS_00009428	686	intergenic lncRNA	-15.59	14.23	-
TCONS_00023066	1238	intergenic lncRNA	-15.12	-	-2.38
TCONS_00016489	6680	intergenic lncRNA	-14.15	-	1.92
TCONS_00010444	2707	intergenic lncRNA	-11.65	13.14	-
TCONS_00029215	2200	intergenic lncRNA	-8.34	8.75	-
TCONS_00034613	1953	intergenic lncRNA	1.9	-	-
TCONS_00007362	3381	intergenic lncRNA	-5.44	-	-1.6
TCONS_00001667	419	intergenic lncRNA	-5.4	4.27	-
TCONS_00034776	580	intergenic lncRNA	-3.69	-	-1.07
TCONS_00019653	563	intergenic lncRNA	-3.52	3.81	-
TCONS_00019890	943	intergenic lncRNA	-3.61	-	-
TCONS_00013245	476	intergenic lncRNA	-3.23	3.2	-
TCONS_00018845	415	intergenic lncRNA	-3.12	2.84	-
TCONS_00004908	1946	intergenic lncRNA	-3.02	1.22	-
TCONS_00028667	1814	intergenic lncRNA	-2.83	-	-17.25
TCONS_00007939	1272	intergenic lncRNA	1.7	-	1.05
TCONS_00030076	1376	intergenic lncRNA	-2.62	-	-2.19
TCONS_00012735	1866	intergenic lncRNA	-4.12	1.06	-
TCONS_00011962	2492	intergenic lncRNA	-2.51	-	-5.14
TCONS_00012674	487	intergenic lncRNA	-2.5	-	-3.14
TCONS_00014563	1209	intergenic lncRNA	-2.45	-	-1.56
TCONS_00023717	2570	intergenic lncRNA	-2.36559	1.13816	-
TCONS_00028557	635	intergenic lncRNA	-2.38	-	-3.25
TCONS_00008906	301	intergenic lncRNA	-2.37	-	-17.34
TCONS_00033008	1457	intergenic lncRNA	-2.35	1.58	-
TCONS_00012148	507	intergenic lncRNA	-2.17	-	-16.2
TCONS_00007361	8560	intergenic lncRNA	-2.12	-	-1.21
TCONS_00016719	824	intergenic lncRNA	-2.1	-	-2.75
TCONS_00033009	5394	intergenic lncRNA	-2.06	1.6	-
TCONS_00011754	819	intergenic lncRNA	-2.05	-	-1.79
TCONS_00031692	1128	intergenic lncRNA	-2.02	-	-
TCONS_00028529	1658	intergenic lncRNA	-1.95	-	-3.71
TCONS_00032216	952	intergenic lncRNA	-1.941	-	-3.27
TCONS_00007210	708	intergenic lncRNA	-1.94	-	-2.05
TCONS_00001747	1300	intergenic lncRNA	-1.89	-	-1.24
TCONS_00021250	768	intergenic lncRNA	-1.88	1.83	-
TCONS_00010914	1138	intergenic lncRNA	-1.85	-	-2.79
TCONS_00016638	2006	intergenic lncRNA	-1.85	-	-2.56
TCONS_00004911	1310	intergenic lncRNA	-1.76	-	1.13
TCONS_00022037	2412	intergenic lncRNA	-1.74	1.68	-
TCONS_00026278	1824	intergenic lncRNA	-1.68	-	-1.48
TCONS_00026455	1354	intergenic lncRNA	-1.53	-	-1.62
TCONS_00033007	5439	intergenic lncRNA	-1.67	1.08	-
TCONS_00003071	504	intergenic lncRNA	-1.56	-	-1.07
TCONS_00024927	679	intergenic lncRNA	-1.55	-	-2.14
TCONS_00006705	1280	intergenic lncRNA	-1.45	-	-1.91
TCONS_00023617	790	intergenic lncRNA	-1.38	-	-1.71
TCONS_00007256	693	intergenic lncRNA	-1.34	-	-3.63
TCONS_00011964	716	intergenic lncRNA	-1.31	-	-4.85
TCONS_00032808	2056	intergenic lncRNA	-1.31	1.81	-
TCONS_00011968	2020	intergenic lncRNA	-1.27	-	-1.84
TCONS_00027431	617	intergenic lncRNA	-1.22	-	-1.47
TCONS_00012328	2375	intergenic lncRNA	-1.17	-	-1.29
TCONS_00003917	4197	intergenic lncRNA	-1.16	-	-1.29
TCONS_00026596	2019	intergenic lncRNA	-1.08	-	-1.28
TCONS_00006491	309	intergenic lncRNA	-1.07	1.61	-
TCONS_00016305	1807	intergenic lncRNA	-1.06	1.06	-
TCONS_00014853	1139	intergenic lncRNA	-1.06	1.03	-
TCONS_00033074	318	intergenic lncRNA	-1.03	-	-1.55
TCONS_00020504	751	sense lncRNA	16.2	-12.75	-
