# Supplementary material for: Regulation of Long Noncoding RNAs Responsive to Phytoplasma Infection in Paulownia tomentosa
Source: Int J Genomics. 2018 Feb 21;2018:3174352. doi: 10.1155/2018/3174352 (PMC5841072; doi:10.1155/2018/3174352)
Supplement: Supplementary 11 — Table S8: the FPKM obtained by RNA-seq and the expression obtained by PCR of lncRNA and mRNA. [file 3174352.f11.xlsx]

## Sheet: Sheet1
Table S8 The expected FPKM determined by RNAseq and the validated results of lncRNAs and target genes
	qRT-PCR (lncRNA)					RNA-Seq (lncRNA)
	PT	PT-MMS	PTI	PTI-MMS		PT	PT-MMS	PTI	PTI-MMS
TCONS_00013163	1	0.827696	1.62959	1.228		8.4749	17.4271	81.494	55.12
TCONS_00026765	1	1.08728	0.220983	0.626825		47.0664	52.2978	13.2453	18.756
TCONS_00007939	1	2.94104	3.44813	3.00166		6.6801	13.8569	21.6938	17.5162
TCONS_00026455	1	0.327347	0.149868	0.245522		84.9796	32.446	29.3982	30.2429
TCONS_00021207	1	0.892912	0.243658	0.81935		4.27179	4.1089	2.0187	4.078
TCONS_00019890	1	0.920891	0.0837758	0.289516		22.5656	15.3828	1.85	2.3707
TCONS_00004908	1	0.735238	0.0495837	0.167692		18.68	17.531	2.3096	5.3978
TCONS_00034613	1	1.10262	3.56931	2.08608		11.5982	18.0022	43.2391	31.9881
TCONS_00012735	1	0.208911	0.100142	0.104363		41.025	20.985	2.3662	4.953
TCONS_00023717	1	1.55642	0.269449	0.790593		33.4253	45.5274	6.486	14.2781
TCONS_00031692	1	0.728565	0.132275	0.44208		64.2454	37.9338	15.7909	18.0309
TCONS_00019806	1	0.97303	0.358424	0.857909		35.556	26.7536	9.0144	12.1337
TCONS_00002625	1	1.32699	0.300521	0.727619		52.2819	60.6404	19.0239	25.4166
TCONS_00005711	1	0.614778	0.126528	0.133669		84.86	36.883	3.6483	11.2613
TCONS_00019894	1	1.05998	0.179977	0.594967		7.1126	18.294	2.972	6.681
TCONS_00021785	1	0.93516	2.35547	1.4237		42.0202	40.8466	84.9897	61.3462
TCONS_00022230	1	0.808933	0.125072	0.308913		18.02	16.7453	2.3224	4.9584
	qRT-PCR (mRNA)					RNA-Seq (mRNA)
	PT	PT-MMS	PTI	PTI-MMS		PT	PT-MMS	PTI	PTI-MMS
PAU019848.1	1	0.170311	0.323343	0.769914		14.474	1.70465	3.2899	9.7352
PAU018908.1	1	0.565549	1.12533	0.695929		3.001	2.131	17.8759	2.75376
PAU009184.1	1	0.860607	0.169001	0.442579		6.49789	3.87722	1.10174	2.94458
LCONS_00004917	1	0.879027	2.43773	1.20164		6.231	5.8448	16.1607	10.6714
LCONS_00018738	1	0.647034	1.23425	0.752641		3.3138	2.0243	7.07018	2.2312
PAU021151.1	1	1.18055	0.482931	1.27663		12.0827	12.3634	5.56141	15.1613
LCONS_00023050	1	1.4573	1.37571	0.256015		6.0794	22.9554	21.5626	3.443
PAU030243.1	1	0.335408	1.83017	0.369449		8.2088	3.0059	19.2373	3.3217
PAU023543.1	1	1.1529	2.17396	1.0882		1.48608	3.09702	3.61476	1.69565
PAU000284.1	1	0.908973	0.723757	1.77023		62.237	36.05	10.53	87.02
PAU002322.1	1	1.27601	0.619917	1.989		3.69	4.28	1.38	6.94
PAU030933.1	1	1.56077	2.14714	1.85533		0.670032	1.64132	4.03821	2.36277
LCONS_00018729	1	0.265332	0.158766	0.220328		7.7703	2.0901	1.643	1.9734
PAU005061.1	1	0.230805	3.1806	0.234465		2.039	1.7253	8.30513	1.02746
PAU002548.1	1	1.24383	2.83271	1.32684		3.58708	4.44988	6.97761	5.87274
PAU023404.1	1	1.28104	2.13071	1.38291		4.87096	6.75931	9.79932	7.04872
PAU011817.1	1	1.02873	0.559501	3.59219		6.03561	6.61847	2.82655	14.9613
PAU011682.1	1	0.940812	0.222692	0.567362		3.01223	2.45554	1.0945	1.79766
