# Supplementary material for: Regulation of Long Noncoding RNAs Responsive to Phytoplasma Infection in Paulownia tomentosa
Source: Int J Genomics. 2018 Feb 21;2018:3174352. doi: 10.1155/2018/3174352 (PMC5841072; doi:10.1155/2018/3174352)
Supplement: Supplementary 12 — Table S9: the potential target genes of phytoplasma-responsive lncRNAs. [file 3174352.f12.xlsx]

## Sheet: Sheet1
Table S9 The potential target genes of phytoplasma-responsive lncRNAs
lncRNA_class	distance	lncRNA	mRNA	Log2(PT vs PTI)lncRNA)	Log2( PT vs PTI(mRNA))	minimum_free_energy
tran	-	TCONS_00012149	LCONS_00000841	-1.7	-	-948.56
cis	7639	TCONS_00003071	LCONS_00003097	-1.56	-	-
cis	0	TCONS_00004908	LCONS_00004912	-3.02	-2.28	-
cis	0	TCONS_00004911	LCONS_00004912	-1.76	-2.28	-
cis	1010	TCONS_00004908	LCONS_00004913	-3.02	-1.49	-
cis	0	TCONS_00004911	LCONS_00004913	-1.76	-1.49	-
cis	8680	TCONS_00004908	LCONS_00004914	-3.02	-1.83	-
cis	112	TCONS_00004911	LCONS_00004914	-1.76	-1.83	-
cis	10015	TCONS_00004908	LCONS_00004915	-3.02	-	-
cis	1447	TCONS_00004911	LCONS_00004915	-1.76	-	-
cis	10933	TCONS_00004908	LCONS_00004916	-3.02	-	-
cis	2365	TCONS_00004911	LCONS_00004916	-1.76	-	-
cis	11818	TCONS_00004908	LCONS_00004917	-3.02	1.37	-
cis	3250	TCONS_00004911	LCONS_00004917	-1.76	1.37	-
cis	0	TCONS_00007256	LCONS_00007229	-1.34	-	-
cis	9417	TCONS_00011754	LCONS_00011688	-2.05	-	-
cis	0	TCONS_00012149	LCONS_00012089	-1.7	-	-
cis	1337	TCONS_00012148	LCONS_00012089	-2.17	-	-
cis	1562	TCONS_00013162	LCONS_00013095	6.18	2.26	-
cis	2985	TCONS_00013163	LCONS_00013095	3.27	2.26	-
cis	8848	TCONS_00014627	LCONS_00014440	-11.69	-	-
cis	0	TCONS_00014853	LCONS_00014713	-1.06317	-	-
cis	8543	TCONS_00016305	LCONS_00016070	-1.06434	-	-
tran	-	TCONS_00029947	LCONS_00018215	-3.24	-	-503.85
tran	-	TCONS_00019894	LCONS_00018215	-1.26	-	-618.98
tran	-	TCONS_00012735	LCONS_00018738	-4.12	1.09	-816.76
cis	0	TCONS_00019526	LCONS_00019384	-2.92	-1.72	-
cis	1977	TCONS_00019894	LCONS_00019769	-1.26	5.34	-
cis	0	TCONS_00019892	LCONS_00019769	4.43	5.34	-
cis	0	TCONS_00019890	LCONS_00019769	-3.61	5.34	-
cis	0	TCONS_00019891	LCONS_00019769	4.48	5.34	-
cis	18511	TCONS_00020881	LCONS_00020756	-16.44	-	-
cis	0	TCONS_00022037	LCONS_00021889	-1.74	-	-
cis	8015	TCONS_00022230	LCONS_00022081	-2.96	14.72	-
cis	0	TCONS_00022230	LCONS_00022082	-2.96	14.33	-
cis	767	TCONS_00023066	LCONS_00022868	-15.12	-	-
tran	-	TCONS_00031692	LCONS_00023050	-2.02	1.83	-397.84
tran	-	TCONS_00007939	LCONS_00023050	1.7	1.83	-514.54
cis	0	TCONS_00023617	LCONS_00023427	-1.38	-	-
cis	0	TCONS_00024927	LCONS_00024736	-1.55	-	-
tran	449401	TCONS_00026473	LCONS_00026306	1.7	-	-630.11
cis	0	TCONS_00026596	LCONS_00026406	-1.08	-	-
cis	2173	TCONS_00030076	LCONS_00029864	-2.62	-	-
cis	2173	TCONS_00030076	LCONS_00029865	-2.62	-	-
tran	-	TCONS_00007588	LCONS_00030149	-3.75	-1.34	-911.33
cis	0	TCONS_00033074	LCONS_00032767	-1.03	-	-
cis	5368	TCONS_00034613	LCONS_00034335	1.9	2.54	-
tran	-	TCONS_00002625	PAU000229.1	-1.4585	-	-305.41
tran	-	TCONS_00032941	PAU000284.1	-3.18	-2.56	-227.33
tran	-	TCONS_00006491	PAU000324.1	-1.07	-	-153.73
tran	-	TCONS_00009511	PAU000910.1	-1.17	-	-681.25
cis	202	TCONS_00002625	PAU002322.1	-1.46	-1.42	-
tran	37279	TCONS_00003071	PAU002634.1	-1.56	-	-243.19
cis	10827	TCONS_00003071	PAU002636.2	-1.56	-	-
cis	5571	TCONS_00003439	PAU003034.1	-1.75	-	-
cis	19290	TCONS_00003915	PAU003474.1	-3.61	-	-
cis	6775	TCONS_00003915	PAU003475.1	-3.61	-	-
cis	12917	TCONS_00003917	PAU003475.1	-1.16	-	-
cis	5270	TCONS_00003917	PAU003476.1	-1.16	-	-
cis	0	TCONS_00003915	PAU003476.1	-3.61	-	-
cis	0	TCONS_00004208	PAU003690.1	-19.5	5.03	-
tran	-	TCONS_00021207	PAU003885.1	-1.08	-	-573.45
tran	-	TCONS_00033008	PAU004193.1	-2.35	-	-592.64
tran	-	TCONS_00029215	PAU004442.1	-8.34	-	-272.48
tran	-	TCONS_00019526	PAU005001.1	2.92	-	-889.69
cis	597	TCONS_00005711	PAU005061.1	-4.54	2.03	-
tran	-	TCONS_00019747	PAU005388.1	3.12	-	-227.51
tran	-	TCONS_00004911	PAU005433.1	-1.76	-	-523.14
cis	11224	TCONS_00006109	PAU005448.1	-1.28	-	-
tran	-	TCONS_00014853	PAU005580.1	-1.06	-2.1	-462.7
cis	0	TCONS_00006812	PAU006029.1	-1.44	-	-
cis	1317	TCONS_00007256	PAU006412.1	-1.34	-	-
cis	7385	TCONS_00007210	PAU006426.1	-1.94	-	-
tran	-	TCONS_00013245	PAU006428.1	-3.23	-	-235.88
cis	13531	TCONS_00007362	PAU006527.1	-5.44	-	-
tran	-	TCONS_00031818	PAU007058.3	-1.23	-	-523.1
tran	756861	TCONS_00008675	PAU007569.1	-2.12	-	-459.78
cis	4889	TCONS_00008676	PAU007663.1	-1.56	-	-
cis	0	TCONS_00008675	PAU007663.1	-2.12	-	-
cis	0	TCONS_00009511	PAU008469.1	-1.17	-	-
cis	7030	TCONS_00009553	PAU008469.1	-1.8	-	-
tran	-	TCONS_00019890	PAU009184.1	-3.61	-2.56	-366.5
cis	18597	TCONS_00010444	PAU009244.1	-11.65	-	-
cis	2225	TCONS_00010595	PAU009403.1	-1.26	-	-
tran	-	TCONS_00010914	PAU009950.2	-1.85	-	-478.68
cis	3203	TCONS_00011754	PAU010449.1	-2.05	-	-
cis	13356	TCONS_00011754	PAU010450.1	-2.05	-	-
tran	-	TCONS_00032216	PAU010475.1	-1.94	-	-373.24
tran	-	TCONS_00007362	PAU010894.1	-5.44	-	-816.56
tran	-	TCONS_00003917	PAU010910.1	-1.16	-	-1154.72
tran	-	TCONS_00033009	PAU011350.1	-2.06	-	-337.98
cis	4134	TCONS_00012735	PAU011364.3	-4.12	-	-
cis	1739	TCONS_00013162	PAU011364.4	6.18	-	-
cis	3162	TCONS_00013162	PAU011364.5	19.38	-	-
cis	2855	TCONS_00013162	PAU011683.1	19.38	-	-
cis	2270	TCONS_00013163	PAU011683.1	3.27	-	-
tran	-	TCONS_00007407	PAU011724.1	-1.6	-	-597.13
cis	9714	TCONS_00013245	PAU011768.1	-3.23	-	-
cis	7562	TCONS_00013245	PAU011769.1	-3.23	-	-
cis	13803	TCONS_00013407	PAU011878.1	-2.37	-1.09	-
cis	0	TCONS_00013407	PAU011882.1	-2.37	-1.49	-
cis	12603	TCONS_00013407	PAU011884.1	-2.37	-	-
tran	-	TCONS_00022037	PAU012304.1	-1.74	-	-882.63
cis	6763	TCONS_00014563	PAU012900.1	-2.45	-	-
cis	6948	TCONS_00014627	PAU012933.1	-11.69	-	-
cis	0	TCONS_00014627	PAU012935.1	-11.69	-	-
tran	-	TCONS_00024489	PAU012999.1	-1.1	-	-216.01
tran	-	TCONS_00030076	PAU014369.1	-2.62	-	-214.36
tran	-	TCONS_00012674	PAU016777.1	-2.5	-	-176.08
cis	2980	TCONS_00018845	PAU016808.1	-3.12	-	-
tran	-	TCONS_00021250	PAU017002.1	-1.88	-	-325.93
cis	6179	TCONS_00019526	PAU017387.1	2.92	-	-
cis	2364	TCONS_00019526	PAU017388.1	2.92	-	-
cis	0	TCONS_00019526	PAU017389.1	2.92	-	-
tran	-	TCONS_00001667	PAU017435.1	-5.4	-	-213.26
tran	-	TCONS_00011968	PAU017445.1	-1.27	-	-287.87
cis	1084	TCONS_00019747	PAU017586.1	3.12	-	-
cis	6452	TCONS_00019747	PAU017589.2	3.12	-	-
tran	-	TCONS_00008619	PAU018124.1	-1.9	-	-564.97
tran	-	TCONS_00008676	PAU018164.1	-1.56	-	-379.8
cis	0	TCONS_00020504	PAU018282.1	16.2	-	-
tran	-	TCONS_00003439	PAU018814.3	-1.75	-	-593.81
tran	-	TCONS_00014563	PAU018838.1	-2.45	-	-529.42
cis	0	TCONS_00021207	PAU018908.1	-1.08	2.57	-
tran	-	TCONS_00028666	PAU019329.1	5.07	-	-726.46
tran	-	TCONS_00004908	PAU019418.1	-3.02	-	-535.03
cis	18448	TCONS_00022037	PAU019762.1	-1.74	-	-
cis	2980	TCONS_00022037	PAU019764.1	-1.74	-	-
tran	-	TCONS_00003915	PAU019826.1	-3.61	-	-927.91
cis	2898	TCONS_00022230	PAU019848.1	-2.96	-2.14	-
tran	-	TCONS_00007361	PAU020586.1	-2.12	-	-1236.06
tran	-	TCONS_00029756	PAU020715.1	-1.26	-	-630
cis	18400	TCONS_00023617	PAU021071.1	-1.38	-	-
cis	8050	TCONS_00023717	PAU021151.1	-2.37	-1.12	-
cis	59	TCONS_00023717	PAU021152.1	-2.37	-	-
tran	-	TCONS_00019653	PAU021405.1	-3.52	-	-154.26
cis	0	TCONS_00024489	PAU021843.1	-1.1	-	-
tran	-	TCONS_00016270	PAU021943.2	-1.65	-	-315.85
tran	-	TCONS_00007210	PAU021983.1	-1.94	-	-255.54
tran	-	TCONS_00019892	PAU022432.1	4.43	-	-147.79
tran	-	TCONS_00034513	PAU022481.1	1.75	-	-640.45
tran	-	TCONS_00016719	PAU022530.1	-2.1	-	-255.88
tran	-	TCONS_00024927	PAU022538.1	-1.55	-	-335.62
tran	-	TCONS_00016638	PAU022553.1	-1.85	-	-910.25
tran	-	TCONS_00018845	PAU022614.1	-3.12	-1.57	-215.66
cis	18940	TCONS_00026455	PAU023543.1	-1.53	1.28	-
cis	4707	TCONS_00026455	PAU023545.1	-1.53	-	-
tran	819061	TCONS_00026455	PAU023636.1	-1.53	-	-345.82
tran	-	TCONS_00016305	PAU023658.1	-1.06	-	-436.81
cis	0	TCONS_00026766	PAU023880.1	8.7	-	-
cis	6260	TCONS_00026766	PAU023881.1	8.7	-	-
cis	1619	TCONS_00027211	PAU024293.2	6.21	-	-
tran	-	TCONS_00027431	PAU024585.1	-1.22	-	-208.57
tran	-	TCONS_00007256	PAU024719.1	-1.34	-	-336.2
tran	-	TCONS_00006109	PAU025985.1	-1.28	-	-1102.93
cis	1167	TCONS_00029214	PAU026110.1	15.29	-	-
cis	8437	TCONS_00029214	PAU026111.1	15.29	-	-
tran	-	TCONS_00010595	PAU026172.1	-1.26	-	-284.41
tran	-	TCONS_00009553	PAU026565.2	-1.8	-	-651.99
cis	12035	TCONS_00029947	PAU026758.1	-3.24	-	-
tran	-	TCONS_00011754	PAU026847.1	-2.05	-	-349.73
tran	-	TCONS_00012328	PAU026868.1	-1.17	-	-877.42
tran	-	TCONS_00013162	PAU027017.1	6.18	-	-366.23
tran	-	TCONS_00023617	PAU027533.1	-1.38	-	-320.88
tran	-	TCONS_00001747	PAU028369.1	-1.89	-	-222.03
cis	5022	TCONS_00032216	PAU028771.1	-1.94	-	-
cis	0	TCONS_00032941	PAU029395.1	-3.18	-	-
tran	-	TCONS_00006812	PAU029473.1	-1.44	-	-546.32
tran	17363	TCONS_00033074	PAU029475.1	-1.03	-	-139.66
cis	6838	TCONS_00033074	PAU029476.1	-1.03	-	-
cis	12838	TCONS_00033009	PAU029501.1	-2.06	-	-
cis	18376	TCONS_00033008	PAU029501.1	-2.35	-	-
cis	19913	TCONS_00033007	PAU029501.1	-1.67	-	-
tran	-	TCONS_00026765	PAU030243.1	-1.83	1.23	-606.03
cis	6047	TCONS_00034613	PAU030933.1	1.9	2.6	-
tran	-	TCONS_00033007	PAU030945.1	-1.67	-	-528.35
tran	-	TCONS_00019891	PAU030960.1	4.48	-	-184.96
