# Supplementary material for: Regulation of Long Noncoding RNAs Responsive to Phytoplasma Infection in Paulownia tomentosa
Source: Int J Genomics. 2018 Feb 21;2018:3174352. doi: 10.1155/2018/3174352 (PMC5841072; doi:10.1155/2018/3174352)
Supplement: Supplementary 13 — Table S10: the splice events of target genes between the healthy and phytoplasma-infected Paulownia. [file 3174352.f13.xlsx]

## Sheet: Sheet1
Table S10 The splice events of target genes between the healthy and phytoplasma-infected Pauownia.
gene	chromosome	strand	AS type	constitutive exon	3' exon	alternative 3' exon	Nr	Nt	Swissprot	KEGG	COG	Interpro	GO
PAU000229.1	scaffold1	+	A3SS	3247076-3247148	3248487-3248647	3247862-3248647	gi|604314754|gb|EYU27460.1|/4.19063e-79/hypothetical protein MIMGU_mgv1a015347mg [Erythranthe guttata]	gi|225462006|ref|XM_002272790.1|/5e-45/PREDICTED: Vitis vinifera uncharacterized LOC100244627, transcript variant 2 (LOC100244627), mRNA	sp|C5XTX2|CSPL8_SORBI/3e-06/CASP-like protein Sb04g002820 OS=Sorghum bicolor GN=Sb04g002820 PE=3 SV=1	-	-	-	-
PAU000229.1	scaffold1	+	RetainedIntron	3247149-3248486	gi|604314754|gb|EYU27460.1|/4.19063e-79/hypothetical protein MIMGU_mgv1a015347mg [Erythranthe guttata]	gi|225462006|ref|XM_002272790.1|/5e-45/PREDICTED: Vitis vinifera uncharacterized LOC100244627, transcript variant 2 (LOC100244627), mRNA	sp|C5XTX2|CSPL8_SORBI/3e-06/CASP-like protein Sb04g002820 OS=Sorghum bicolor GN=Sb04g002820 PE=3 SV=1		-	-	-
PAU000229.1	scaffold1	+	RetainedIntron	3248648-3249226	gi|604314754|gb|EYU27460.1|/4.19063e-79/hypothetical protein MIMGU_mgv1a015347mg [Erythranthe guttata]	gi|225462006|ref|XM_002272790.1|/5e-45/PREDICTED: Vitis vinifera uncharacterized LOC100244627, transcript variant 2 (LOC100244627), mRNA	sp|C5XTX2|CSPL8_SORBI/3e-06/CASP-like protein Sb04g002820 OS=Sorghum bicolor GN=Sb04g002820 PE=3 SV=1	-	-	-	-
PAU000229.1	scaffold1	+	RetainedIntron	3249303-3249914	gi|604314754|gb|EYU27460.1|/4.19063e-79/hypothetical protein MIMGU_mgv1a015347mg [Erythranthe guttata]	gi|225462006|ref|XM_002272790.1|/5e-45/PREDICTED: Vitis vinifera uncharacterized LOC100244627, transcript variant 2 (LOC100244627), mRNA	sp|C5XTX2|CSPL8_SORBI/3e-06/CASP-like protein Sb04g002820 OS=Sorghum bicolor GN=Sb04g002820 PE=3 SV=1	-	-	-	-
PAU000229.1	scaffold1	+	SkippedExon	3247076-3247148	3248487-3248647	3249227-3249302	gi|604314754|gb|EYU27460.1|/4.19063e-79/hypothetical protein MIMGU_mgv1a015347mg [Erythranthe guttata]	gi|225462006|ref|XM_002272790.1|/5e-45/PREDICTED: Vitis vinifera uncharacterized LOC100244627, transcript variant 2 (LOC100244627), mRNA	sp|C5XTX2|CSPL8_SORBI/3e-06/CASP-like protein Sb04g002820 OS=Sorghum bicolor GN=Sb04g002820 PE=3 SV=1	-	-	-	-
PAU000229.1	scaffold1	+	A5SS	3249915-3250111	3249227-3249302	3249227-3249493	gi|604314754|gb|EYU27460.1|/4.19063e-79/hypothetical protein MIMGU_mgv1a015347mg [Erythranthe guttata]	gi|225462006|ref|XM_002272790.1|/5e-45/PREDICTED: Vitis vinifera uncharacterized LOC100244627, transcript variant 2 (LOC100244627), mRNA	sp|C5XTX2|CSPL8_SORBI/3e-06/CASP-like protein Sb04g002820 OS=Sorghum bicolor GN=Sb04g002820 PE=3 SV=1	-	-	-	-
PAU000284.1	scaffold1	+	SkippedExon	3669614-3669672	3670294-3670349	3670431-3670483	gi|698570242|ref|XP_009774551.1|/2.52533e-62/PREDICTED: photosystem II 10 kDa polypeptide, chloroplastic [Nicotiana sylvestris]	gi|22668|emb|X70088.1|/2e-62/N. tabacum mRNA for NtpII10	sp|P06183|PSBR_SOLTU/2e-61/Photosystem II 10 kDa polypeptide, chloroplastic OS=Solanum tuberosum GN=PSBR PE=2 SV=1	vvi:100243967/3e-61/photosystem II 10 kDa polypeptide, chloroplastic-like; K03541 photosystem II 10kDa protein	-	PF04725/1.2E-52/Photosystem II 10 kDa polypeptide PsbR	-
PAU000284.1	scaffold1	+	A3SS	3670294-3670349	3670431-3670483	3670447-3670483	gi|698570242|ref|XP_009774551.1|/2.52533e-62/PREDICTED: photosystem II 10 kDa polypeptide, chloroplastic [Nicotiana sylvestris]	gi|22668|emb|X70088.1|/2e-62/N. tabacum mRNA for NtpII10	sp|P06183|PSBR_SOLTU/2e-61/Photosystem II 10 kDa polypeptide, chloroplastic OS=Solanum tuberosum GN=PSBR PE=2 SV=1	vvi:100243967/3e-61/photosystem II 10 kDa polypeptide, chloroplastic-like; K03541 photosystem II 10kDa protein	-	PF04725/1.2E-52/Photosystem II 10 kDa polypeptide PsbR	-
PAU000284.1	scaffold1	+	SkippedExon	3669614-3669672	3670431-3670483	3670584-3670678	gi|698570242|ref|XP_009774551.1|/2.52533e-62/PREDICTED: photosystem II 10 kDa polypeptide, chloroplastic [Nicotiana sylvestris]	gi|22668|emb|X70088.1|/2e-62/N. tabacum mRNA for NtpII10	sp|P06183|PSBR_SOLTU/2e-61/Photosystem II 10 kDa polypeptide, chloroplastic OS=Solanum tuberosum GN=PSBR PE=2 SV=1	vvi:100243967/3e-61/photosystem II 10 kDa polypeptide, chloroplastic-like; K03541 photosystem II 10kDa protein	-	PF04725/1.2E-52/Photosystem II 10 kDa polypeptide PsbR	-
PAU000284.1	scaffold1	+	SkippedExon	3669614-3669672	3670294-3670349,3670431-3670483	3670584-3670678	gi|698570242|ref|XP_009774551.1|/2.52533e-62/PREDICTED: photosystem II 10 kDa polypeptide, chloroplastic [Nicotiana sylvestris]	gi|22668|emb|X70088.1|/2e-62/N. tabacum mRNA for NtpII10	sp|P06183|PSBR_SOLTU/2e-61/Photosystem II 10 kDa polypeptide, chloroplastic OS=Solanum tuberosum GN=PSBR PE=2 SV=1	vvi:100243967/3e-61/photosystem II 10 kDa polypeptide, chloroplastic-like; K03541 photosystem II 10kDa protein	-	PF04725/1.2E-52/Photosystem II 10 kDa polypeptide PsbR	-
PAU000324.1	scaffold1	-	A3SS	4067702-4068019	4067309-4067467	4067309-4067613	gi|527194462|gb|EPS64076.1|/0/phosphoglycerate kinase [Genlisea aurea]	gi|1161601|emb|Z48976.1|/0.0/N.tabacum mRNA for phosphoglycerate kinase (cytosolic isoenzyme)	sp|Q42962|PGKY_TOBAC/0.0/Phosphoglycerate kinase, cytosolic OS=Nicotiana tabacum PE=1 SV=1	pop:POPTR_564181/0.0/phosphoglycerate kinase (EC:2.7.7.2 2.7.2.3); K00927 phosphoglycerate kinase [EC:2.7.2.3]	all4131/1e-161/---	PTHR11406:SF8/1.9E-283/--	-
PAU000910.1	scaffold10	+	RetainedIntron	2237669-2237826	gi|604315934|gb|EYU28490.1|/0/hypothetical protein MIMGU_mgv1a005429mg [Erythranthe guttata]	gi|352144534|gb|JF760205.1|/0.0/Salvia miltiorrhiza auxin influx transport protein (AUX1) mRNA, complete cds	sp|Q9FEL7|LAX2_MEDTR/0.0/Auxin transporter-like protein 2 OS=Medicago truncatula GN=LAX2 PE=2 SV=1	vvi:100233126/0.0/LAX1; AUX-1-like protein; K13946 auxin influx carrier (AUX1 LAX family)	-	PTHR22950/0.0/--	-
PAU000910.1	scaffold10	+	RetainedIntron	2238013-2238100	gi|604315934|gb|EYU28490.1|/0/hypothetical protein MIMGU_mgv1a005429mg [Erythranthe guttata]	gi|352144534|gb|JF760205.1|/0.0/Salvia miltiorrhiza auxin influx transport protein (AUX1) mRNA, complete cds	sp|Q9FEL7|LAX2_MEDTR/0.0/Auxin transporter-like protein 2 OS=Medicago truncatula GN=LAX2 PE=2 SV=1	vvi:100233126/0.0/LAX1; AUX-1-like protein; K13946 auxin influx carrier (AUX1 LAX family)	-	PTHR22950/0.0/--	-
PAU000910.1	scaffold10	+	RetainedIntron	2238214-2238340	gi|604315934|gb|EYU28490.1|/0/hypothetical protein MIMGU_mgv1a005429mg [Erythranthe guttata]	gi|352144534|gb|JF760205.1|/0.0/Salvia miltiorrhiza auxin influx transport protein (AUX1) mRNA, complete cds	sp|Q9FEL7|LAX2_MEDTR/0.0/Auxin transporter-like protein 2 OS=Medicago truncatula GN=LAX2 PE=2 SV=1	vvi:100233126/0.0/LAX1; AUX-1-like protein; K13946 auxin influx carrier (AUX1 LAX family)	-	PTHR22950/0.0/--	-
PAU000910.1	scaffold10	+	RetainedIntron	2238525-2238676	gi|604315934|gb|EYU28490.1|/0/hypothetical protein MIMGU_mgv1a005429mg [Erythranthe guttata]	gi|352144534|gb|JF760205.1|/0.0/Salvia miltiorrhiza auxin influx transport protein (AUX1) mRNA, complete cds	sp|Q9FEL7|LAX2_MEDTR/0.0/Auxin transporter-like protein 2 OS=Medicago truncatula GN=LAX2 PE=2 SV=1	vvi:100233126/0.0/LAX1; AUX-1-like protein; K13946 auxin influx carrier (AUX1 LAX family)	-	PTHR22950/0.0/--	-
PAU000910.1	scaffold10	+	RetainedIntron	2238775-2239442	gi|604315934|gb|EYU28490.1|/0/hypothetical protein MIMGU_mgv1a005429mg [Erythranthe guttata]	gi|352144534|gb|JF760205.1|/0.0/Salvia miltiorrhiza auxin influx transport protein (AUX1) mRNA, complete cds	sp|Q9FEL7|LAX2_MEDTR/0.0/Auxin transporter-like protein 2 OS=Medicago truncatula GN=LAX2 PE=2 SV=1	vvi:100233126/0.0/LAX1; AUX-1-like protein; K13946 auxin influx carrier (AUX1 LAX family)	-	PTHR22950/0.0/--	-
PAU000910.1	scaffold10	+	RetainedIntron	2239651-2239907	gi|604315934|gb|EYU28490.1|/0/hypothetical protein MIMGU_mgv1a005429mg [Erythranthe guttata]	gi|352144534|gb|JF760205.1|/0.0/Salvia miltiorrhiza auxin influx transport protein (AUX1) mRNA, complete cds	sp|Q9FEL7|LAX2_MEDTR/0.0/Auxin transporter-like protein 2 OS=Medicago truncatula GN=LAX2 PE=2 SV=1	vvi:100233126/0.0/LAX1; AUX-1-like protein; K13946 auxin influx carrier (AUX1 LAX family)	-	PTHR22950/0.0/--	-
PAU000910.1	scaffold10	+	RetainedIntron	2240166-2241008	gi|604315934|gb|EYU28490.1|/0/hypothetical protein MIMGU_mgv1a005429mg [Erythranthe guttata]	gi|352144534|gb|JF760205.1|/0.0/Salvia miltiorrhiza auxin influx transport protein (AUX1) mRNA, complete cds	sp|Q9FEL7|LAX2_MEDTR/0.0/Auxin transporter-like protein 2 OS=Medicago truncatula GN=LAX2 PE=2 SV=1	vvi:100233126/0.0/LAX1; AUX-1-like protein; K13946 auxin influx carrier (AUX1 LAX family)	-	PTHR22950/0.0/--	-
PAU000910.1	scaffold10	+	SkippedExon	2238101-2238213	2238341-2238524	2238677-2238774	gi|604315934|gb|EYU28490.1|/0/hypothetical protein MIMGU_mgv1a005429mg [Erythranthe guttata]	gi|352144534|gb|JF760205.1|/0.0/Salvia miltiorrhiza auxin influx transport protein (AUX1) mRNA, complete cds	sp|Q9FEL7|LAX2_MEDTR/0.0/Auxin transporter-like protein 2 OS=Medicago truncatula GN=LAX2 PE=2 SV=1	vvi:100233126/0.0/LAX1; AUX-1-like protein; K13946 auxin influx carrier (AUX1 LAX family)	-	PTHR22950/0.0/--	-
PAU000910.1	scaffold10	+	A3SS	2238101-2238213	2238341-2238524	2238463-2238524	gi|604315934|gb|EYU28490.1|/0/hypothetical protein MIMGU_mgv1a005429mg [Erythranthe guttata]	gi|352144534|gb|JF760205.1|/0.0/Salvia miltiorrhiza auxin influx transport protein (AUX1) mRNA, complete cds	sp|Q9FEL7|LAX2_MEDTR/0.0/Auxin transporter-like protein 2 OS=Medicago truncatula GN=LAX2 PE=2 SV=1	vvi:100233126/0.0/LAX1; AUX-1-like protein; K13946 auxin influx carrier (AUX1 LAX family)	-	PTHR22950/0.0/--	-
PAU002322.1	scaffold117	+	A5SS	498628-499117	497857-498170	497857-498172	gi|720086034|ref|XP_010243713.1|/2.29606e-148/PREDICTED: chlorophyll a-b binding protein of LHCII type 1-like [Nelumbo nucifera]	gi|147857733|emb|AM447362.2|/1e-132/Vitis vinifera contig VV78X207753.10, whole genome shotgun sequence	sp|P07369|CB2G_SOLLC/1e-144/Chlorophyll a-b binding protein 3C, chloroplastic OS=Solanum lycopersicum GN=CAB3C PE=3 SV=1	vvi:100245214/1e-144/chlorophyll a-b binding protein 40, chloroplastic-like; K08912 light-harvesting complex II chlorophyll a/b binding protein 1	-	PTHR21649:SF9/2.2E-202/--	-
PAU002634.1	scaffold12	+	RetainedIntron	640384-640468	gi|645258724|ref|XP_008235019.1|/0/PREDICTED: potassium transporter 5-like [Prunus mume]	gi|526117959|ref|NM_001280973.1|/3e-89/Vitis vinifera KUP1 (LOC100232991), mRNA >gi|93115178|gb|DQ465409.1| Vitis vinifera KUP1 mRNA, complete cds	sp|Q5JK32|HAK5_ORYSJ/0.0/Potassium transporter 5 OS=Oryza sativa subsp. japonica GN=HAK5 PE=2 SV=2	mtr:MTR_7g108480/0.0/Potassium transporter; K03549 KUP system potassium uptake protein	YPO0006/6e-88/---	PTHR30540/0.0/--	biological_process:GO:0071805//potassium ion transmembrane transport;cellular_component:GO:0016020//membrane;molecular_function:GO:0015079//potassium ion transmembrane transporter activity;
PAU002634.1	scaffold12	+	RetainedIntron	640695-641990	gi|645258724|ref|XP_008235019.1|/0/PREDICTED: potassium transporter 5-like [Prunus mume]	gi|526117959|ref|NM_001280973.1|/3e-89/Vitis vinifera KUP1 (LOC100232991), mRNA >gi|93115178|gb|DQ465409.1| Vitis vinifera KUP1 mRNA, complete cds	sp|Q5JK32|HAK5_ORYSJ/0.0/Potassium transporter 5 OS=Oryza sativa subsp. japonica GN=HAK5 PE=2 SV=2	mtr:MTR_7g108480/0.0/Potassium transporter; K03549 KUP system potassium uptake protein	YPO0006/6e-88/---	PTHR30540/0.0/--	biological_process:GO:0071805//potassium ion transmembrane transport;cellular_component:GO:0016020//membrane;molecular_function:GO:0015079//potassium ion transmembrane transporter activity;
PAU002634.1	scaffold12	+	RetainedIntron	642240-642373	gi|645258724|ref|XP_008235019.1|/0/PREDICTED: potassium transporter 5-like [Prunus mume]	gi|526117959|ref|NM_001280973.1|/3e-89/Vitis vinifera KUP1 (LOC100232991), mRNA >gi|93115178|gb|DQ465409.1| Vitis vinifera KUP1 mRNA, complete cds	sp|Q5JK32|HAK5_ORYSJ/0.0/Potassium transporter 5 OS=Oryza sativa subsp. japonica GN=HAK5 PE=2 SV=2	mtr:MTR_7g108480/0.0/Potassium transporter; K03549 KUP system potassium uptake protein	YPO0006/6e-88/---	PTHR30540/0.0/--	biological_process:GO:0071805//potassium ion transmembrane transport;cellular_component:GO:0016020//membrane;molecular_function:GO:0015079//potassium ion transmembrane transporter activity;
PAU002634.1	scaffold12	+	RetainedIntron	643185-643272	gi|645258724|ref|XP_008235019.1|/0/PREDICTED: potassium transporter 5-like [Prunus mume]	gi|526117959|ref|NM_001280973.1|/3e-89/Vitis vinifera KUP1 (LOC100232991), mRNA >gi|93115178|gb|DQ465409.1| Vitis vinifera KUP1 mRNA, complete cds	sp|Q5JK32|HAK5_ORYSJ/0.0/Potassium transporter 5 OS=Oryza sativa subsp. japonica GN=HAK5 PE=2 SV=2	mtr:MTR_7g108480/0.0/Potassium transporter; K03549 KUP system potassium uptake protein	YPO0006/6e-88/---	PTHR30540/0.0/--	biological_process:GO:0071805//potassium ion transmembrane transport;cellular_component:GO:0016020//membrane;molecular_function:GO:0015079//potassium ion transmembrane transporter activity;
PAU002634.1	scaffold12	+	RetainedIntron	643441-643538	gi|645258724|ref|XP_008235019.1|/0/PREDICTED: potassium transporter 5-like [Prunus mume]	gi|526117959|ref|NM_001280973.1|/3e-89/Vitis vinifera KUP1 (LOC100232991), mRNA >gi|93115178|gb|DQ465409.1| Vitis vinifera KUP1 mRNA, complete cds	sp|Q5JK32|HAK5_ORYSJ/0.0/Potassium transporter 5 OS=Oryza sativa subsp. japonica GN=HAK5 PE=2 SV=2	mtr:MTR_7g108480/0.0/Potassium transporter; K03549 KUP system potassium uptake protein	YPO0006/6e-88/---	PTHR30540/0.0/--	biological_process:GO:0071805//potassium ion transmembrane transport;cellular_component:GO:0016020//membrane;molecular_function:GO:0015079//potassium ion transmembrane transporter activity;
PAU003474.1	scaffold125	+	A3SS	667700-667846	667930-668070	667910-668070	gi|661895030|emb|CDP02029.1|/0/unnamed protein product [Coffea canephora]	gi|359476706|ref|XM_002269371.2|/0.0/PREDICTED: Vitis vinifera succinate dehydrogenase [ubiquinone] flavoprotein subunit 1, mitochondrial-like, transcript variant 1 (LOC100254718), mRNA	sp|O82663|SDHA1_ARATH/0.0/Succinate dehydrogenase [ubiquinone] flavoprotein subunit 1, mitochondrial OS=Arabidopsis thaliana GN=SDH1-1 PE=1 SV=1	pop:POPTR_219180/0.0/succinate dehydrogenase (EC:1.3.5.1); K00234 succinate dehydrogenase (ubiquinone) flavoprotein subunit [EC:1.3.5.1]	SPAC1556.02c/0.0/---	PF00890/3.2E-124/FAD binding domain	-
PAU003474.1	scaffold125	+	A3SS	670802-670871	670968-671088	670976-671088	gi|661895030|emb|CDP02029.1|/0/unnamed protein product [Coffea canephora]	gi|359476706|ref|XM_002269371.2|/0.0/PREDICTED: Vitis vinifera succinate dehydrogenase [ubiquinone] flavoprotein subunit 1, mitochondrial-like, transcript variant 1 (LOC100254718), mRNA	sp|O82663|SDHA1_ARATH/0.0/Succinate dehydrogenase [ubiquinone] flavoprotein subunit 1, mitochondrial OS=Arabidopsis thaliana GN=SDH1-1 PE=1 SV=1	pop:POPTR_219180/0.0/succinate dehydrogenase (EC:1.3.5.1); K00234 succinate dehydrogenase (ubiquinone) flavoprotein subunit [EC:1.3.5.1]	SPAC1556.02c/0.0/---	PF00890/3.2E-124/FAD binding domain	-
PAU003690.1	scaffold128	+	RetainedIntron	439353-439452	gi|604298345|gb|EYU18389.1|/1.27497e-50/hypothetical protein MIMGU_mgv1a012859mg [Erythranthe guttata]	gi|225470985|ref|XM_002265467.1|/9e-18/PREDICTED: Vitis vinifera MADS-box transcription factor 27-like (LOC100244955), mRNA	sp|A2RVQ5|AGL16_ARATH/3e-30/Agamous-like MADS-box protein AGL16 OS=Arabidopsis thaliana GN=AGL16 PE=1 SV=1	vvi:100244955/4e-42/MADS-box transcription factor 27-like; K09264 MADS-box transcription factor, plant	-	PTHR11945/2.2E-36/--	-
PAU003690.1	scaffold128	+	RetainedIntron	439495-439580	gi|604298345|gb|EYU18389.1|/1.27497e-50/hypothetical protein MIMGU_mgv1a012859mg [Erythranthe guttata]	gi|225470985|ref|XM_002265467.1|/9e-18/PREDICTED: Vitis vinifera MADS-box transcription factor 27-like (LOC100244955), mRNA	sp|A2RVQ5|AGL16_ARATH/3e-30/Agamous-like MADS-box protein AGL16 OS=Arabidopsis thaliana GN=AGL16 PE=1 SV=1	vvi:100244955/4e-42/MADS-box transcription factor 27-like; K09264 MADS-box transcription factor, plant	-	PTHR11945/2.2E-36/--	-
PAU003690.1	scaffold128	+	RetainedIntron	439665-439771	gi|604298345|gb|EYU18389.1|/1.27497e-50/hypothetical protein MIMGU_mgv1a012859mg [Erythranthe guttata]	gi|225470985|ref|XM_002265467.1|/9e-18/PREDICTED: Vitis vinifera MADS-box transcription factor 27-like (LOC100244955), mRNA	sp|A2RVQ5|AGL16_ARATH/3e-30/Agamous-like MADS-box protein AGL16 OS=Arabidopsis thaliana GN=AGL16 PE=1 SV=1	vvi:100244955/4e-42/MADS-box transcription factor 27-like; K09264 MADS-box transcription factor, plant	-	PTHR11945/2.2E-36/--	-
PAU004193.1	scaffold132	+	RetainedIntron	743121-743905	gi|698488798|ref|XP_009790986.1|/0/PREDICTED: uncharacterized protein LOC104238351 [Nicotiana sylvestris]	gi|359487803|ref|XM_002280599.2|/5e-79/PREDICTED: Vitis vinifera uncharacterized LOC100263126 (LOC100263126), mRNA	sp|Q8S9K3|VAR3_ARATH/6e-33/Zinc finger protein VAR3, chloroplastic OS=Arabidopsis thaliana GN=VAR3 PE=1 SV=2	gmx:100792927/4e-06/uncharacterized LOC100792927; K13172 serine/arginine repetitive matrix protein 2	YJL129c/8e-06/---	PF00641/3.4E-10/Zn-finger in Ran binding protein and others	-
PAU004193.1	scaffold132	+	RetainedIntron	744259-744825	gi|698488798|ref|XP_009790986.1|/0/PREDICTED: uncharacterized protein LOC104238351 [Nicotiana sylvestris]	gi|359487803|ref|XM_002280599.2|/5e-79/PREDICTED: Vitis vinifera uncharacterized LOC100263126 (LOC100263126), mRNA	sp|Q8S9K3|VAR3_ARATH/6e-33/Zinc finger protein VAR3, chloroplastic OS=Arabidopsis thaliana GN=VAR3 PE=1 SV=2	gmx:100792927/4e-06/uncharacterized LOC100792927; K13172 serine/arginine repetitive matrix protein 2	YJL129c/8e-06/---	PF00641/3.4E-10/Zn-finger in Ran binding protein and others	-
PAU004193.1	scaffold132	+	RetainedIntron	744925-745345	gi|698488798|ref|XP_009790986.1|/0/PREDICTED: uncharacterized protein LOC104238351 [Nicotiana sylvestris]	gi|359487803|ref|XM_002280599.2|/5e-79/PREDICTED: Vitis vinifera uncharacterized LOC100263126 (LOC100263126), mRNA	sp|Q8S9K3|VAR3_ARATH/6e-33/Zinc finger protein VAR3, chloroplastic OS=Arabidopsis thaliana GN=VAR3 PE=1 SV=2	gmx:100792927/4e-06/uncharacterized LOC100792927; K13172 serine/arginine repetitive matrix protein 2	YJL129c/8e-06/---	PF00641/3.4E-10/Zn-finger in Ran binding protein and others	-
PAU005001.1	scaffold145	+	RetainedIntron	753163-753761	gi|604301976|gb|EYU21562.1|/0/hypothetical protein MIMGU_mgv1a004387mg [Erythranthe guttata]	gi|126238201|gb|EF071926.1|/6e-07/Solanum lycopersicum centromere protein C1 (CENPC1) mRNA, partial cds	-	-	-	-	-
PAU005001.1	scaffold145	+	RetainedIntron	753974-754071	gi|604301976|gb|EYU21562.1|/0/hypothetical protein MIMGU_mgv1a004387mg [Erythranthe guttata]	gi|126238201|gb|EF071926.1|/6e-07/Solanum lycopersicum centromere protein C1 (CENPC1) mRNA, partial cds	-	-	-	-	-
PAU005001.1	scaffold145	+	RetainedIntron	754161-754276	gi|604301976|gb|EYU21562.1|/0/hypothetical protein MIMGU_mgv1a004387mg [Erythranthe guttata]	gi|126238201|gb|EF071926.1|/6e-07/Solanum lycopersicum centromere protein C1 (CENPC1) mRNA, partial cds	-	-	-	-	-
PAU005001.1	scaffold145	+	RetainedIntron	754380-754494	gi|604301976|gb|EYU21562.1|/0/hypothetical protein MIMGU_mgv1a004387mg [Erythranthe guttata]	gi|126238201|gb|EF071926.1|/6e-07/Solanum lycopersicum centromere protein C1 (CENPC1) mRNA, partial cds	-	-	-	-	-
PAU005001.1	scaffold145	+	RetainedIntron	755538-755796	gi|604301976|gb|EYU21562.1|/0/hypothetical protein MIMGU_mgv1a004387mg [Erythranthe guttata]	gi|126238201|gb|EF071926.1|/6e-07/Solanum lycopersicum centromere protein C1 (CENPC1) mRNA, partial cds	-	-	-	-	-
PAU005433.1	scaffold157	-	A3SS	619340-619631	619129-619214	619129-619186	gi|604297120|gb|EYU17395.1|/5.28903e-176/hypothetical protein MIMGU_mgv1a020798mg [Erythranthe guttata]	gi|225321616|dbj|AK325633.1|/2e-36/Solanum lycopersicum cDNA, clone: LEFL2003AC11, HTC in fruit	-	-	-	PTHR31343/2.3E-154/--	-
PAU005433.1	scaffold157	-	RetainedIntron	618707-618947	gi|604297120|gb|EYU17395.1|/5.28903e-176/hypothetical protein MIMGU_mgv1a020798mg [Erythranthe guttata]	gi|225321616|dbj|AK325633.1|/2e-36/Solanum lycopersicum cDNA, clone: LEFL2003AC11, HTC in fruit	-	-	-	PTHR31343/2.3E-154/--	-
PAU005433.1	scaffold157	-	RetainedIntron	619040-619128	gi|604297120|gb|EYU17395.1|/5.28903e-176/hypothetical protein MIMGU_mgv1a020798mg [Erythranthe guttata]	gi|225321616|dbj|AK325633.1|/2e-36/Solanum lycopersicum cDNA, clone: LEFL2003AC11, HTC in fruit	-	-	-	PTHR31343/2.3E-154/--	-
PAU005433.1	scaffold157	-	RetainedIntron	619215-619339	gi|604297120|gb|EYU17395.1|/5.28903e-176/hypothetical protein MIMGU_mgv1a020798mg [Erythranthe guttata]	gi|225321616|dbj|AK325633.1|/2e-36/Solanum lycopersicum cDNA, clone: LEFL2003AC11, HTC in fruit	-	-	-	PTHR31343/2.3E-154/--	-
PAU005433.1	scaffold157	-	RetainedIntron	619632-620272	gi|604297120|gb|EYU17395.1|/5.28903e-176/hypothetical protein MIMGU_mgv1a020798mg [Erythranthe guttata]	gi|225321616|dbj|AK325633.1|/2e-36/Solanum lycopersicum cDNA, clone: LEFL2003AC11, HTC in fruit	-	-	-	PTHR31343/2.3E-154/--	-
PAU005433.1	scaffold157	-	RetainedIntron	620485-621318	gi|604297120|gb|EYU17395.1|/5.28903e-176/hypothetical protein MIMGU_mgv1a020798mg [Erythranthe guttata]	gi|225321616|dbj|AK325633.1|/2e-36/Solanum lycopersicum cDNA, clone: LEFL2003AC11, HTC in fruit	-	-	-	PTHR31343/2.3E-154/--	-
PAU005433.1	scaffold157	-	A3SS	620273-620484	619340-619631	619340-619655	gi|604297120|gb|EYU17395.1|/5.28903e-176/hypothetical protein MIMGU_mgv1a020798mg [Erythranthe guttata]	gi|225321616|dbj|AK325633.1|/2e-36/Solanum lycopersicum cDNA, clone: LEFL2003AC11, HTC in fruit	-	-	-	PTHR31343/2.3E-154/--	-
PAU005580.1	scaffold159	+	RetainedIntron	666885-667120	gi|604333324|gb|EYU37675.1|/0/hypothetical protein MIMGU_mgv1a005586mg [Erythranthe guttata]	gi|225428813|ref|XM_002282197.1|/2e-80/PREDICTED: Vitis vinifera abscisic acid 8'-hydroxylase 4-like (LOC100246968), mRNA	sp|Q9LJK2|ABAH4_ARATH/2e-180/Abscisic acid 8'-hydroxylase 4 OS=Arabidopsis thaliana GN=CYP707A4 PE=2 SV=2	vvi:100246968/0.0/abscisic acid 8'-hydroxylase 4-like; K09843 (+)-abscisic acid 8'-hydroxylase [EC:1.14.13.93]	slr0574/6e-50/---	PTHR24286/2.9E-230/--	-
PAU005580.1	scaffold159	+	RetainedIntron	667271-667374	gi|604333324|gb|EYU37675.1|/0/hypothetical protein MIMGU_mgv1a005586mg [Erythranthe guttata]	gi|225428813|ref|XM_002282197.1|/2e-80/PREDICTED: Vitis vinifera abscisic acid 8'-hydroxylase 4-like (LOC100246968), mRNA	sp|Q9LJK2|ABAH4_ARATH/2e-180/Abscisic acid 8'-hydroxylase 4 OS=Arabidopsis thaliana GN=CYP707A4 PE=2 SV=2	vvi:100246968/0.0/abscisic acid 8'-hydroxylase 4-like; K09843 (+)-abscisic acid 8'-hydroxylase [EC:1.14.13.93]	slr0574/6e-50/---	PTHR24286/2.9E-230/--	-
PAU005580.1	scaffold159	+	RetainedIntron	667624-667717	gi|604333324|gb|EYU37675.1|/0/hypothetical protein MIMGU_mgv1a005586mg [Erythranthe guttata]	gi|225428813|ref|XM_002282197.1|/2e-80/PREDICTED: Vitis vinifera abscisic acid 8'-hydroxylase 4-like (LOC100246968), mRNA	sp|Q9LJK2|ABAH4_ARATH/2e-180/Abscisic acid 8'-hydroxylase 4 OS=Arabidopsis thaliana GN=CYP707A4 PE=2 SV=2	vvi:100246968/0.0/abscisic acid 8'-hydroxylase 4-like; K09843 (+)-abscisic acid 8'-hydroxylase [EC:1.14.13.93]	slr0574/6e-50/---	PTHR24286/2.9E-230/--	-
PAU005580.1	scaffold159	+	RetainedIntron	667808-667937	gi|604333324|gb|EYU37675.1|/0/hypothetical protein MIMGU_mgv1a005586mg [Erythranthe guttata]	gi|225428813|ref|XM_002282197.1|/2e-80/PREDICTED: Vitis vinifera abscisic acid 8'-hydroxylase 4-like (LOC100246968), mRNA	sp|Q9LJK2|ABAH4_ARATH/2e-180/Abscisic acid 8'-hydroxylase 4 OS=Arabidopsis thaliana GN=CYP707A4 PE=2 SV=2	vvi:100246968/0.0/abscisic acid 8'-hydroxylase 4-like; K09843 (+)-abscisic acid 8'-hydroxylase [EC:1.14.13.93]	slr0574/6e-50/---	PTHR24286/2.9E-230/--	-
PAU005580.1	scaffold159	+	RetainedIntron	668017-668149	gi|604333324|gb|EYU37675.1|/0/hypothetical protein MIMGU_mgv1a005586mg [Erythranthe guttata]	gi|225428813|ref|XM_002282197.1|/2e-80/PREDICTED: Vitis vinifera abscisic acid 8'-hydroxylase 4-like (LOC100246968), mRNA	sp|Q9LJK2|ABAH4_ARATH/2e-180/Abscisic acid 8'-hydroxylase 4 OS=Arabidopsis thaliana GN=CYP707A4 PE=2 SV=2	vvi:100246968/0.0/abscisic acid 8'-hydroxylase 4-like; K09843 (+)-abscisic acid 8'-hydroxylase [EC:1.14.13.93]	slr0574/6e-50/---	PTHR24286/2.9E-230/--	-
PAU005580.1	scaffold159	+	RetainedIntron	668257-668409	gi|604333324|gb|EYU37675.1|/0/hypothetical protein MIMGU_mgv1a005586mg [Erythranthe guttata]	gi|225428813|ref|XM_002282197.1|/2e-80/PREDICTED: Vitis vinifera abscisic acid 8'-hydroxylase 4-like (LOC100246968), mRNA	sp|Q9LJK2|ABAH4_ARATH/2e-180/Abscisic acid 8'-hydroxylase 4 OS=Arabidopsis thaliana GN=CYP707A4 PE=2 SV=2	vvi:100246968/0.0/abscisic acid 8'-hydroxylase 4-like; K09843 (+)-abscisic acid 8'-hydroxylase [EC:1.14.13.93]	slr0574/6e-50/---	PTHR24286/2.9E-230/--	-
PAU005580.1	scaffold159	+	RetainedIntron	668529-668760	gi|604333324|gb|EYU37675.1|/0/hypothetical protein MIMGU_mgv1a005586mg [Erythranthe guttata]	gi|225428813|ref|XM_002282197.1|/2e-80/PREDICTED: Vitis vinifera abscisic acid 8'-hydroxylase 4-like (LOC100246968), mRNA	sp|Q9LJK2|ABAH4_ARATH/2e-180/Abscisic acid 8'-hydroxylase 4 OS=Arabidopsis thaliana GN=CYP707A4 PE=2 SV=2	vvi:100246968/0.0/abscisic acid 8'-hydroxylase 4-like; K09843 (+)-abscisic acid 8'-hydroxylase [EC:1.14.13.93]	slr0574/6e-50/---	PTHR24286/2.9E-230/--	-
PAU006428.1	scaffold172	+	A5SS	724764-724877	724016-724262	724016-724334	gi|657404247|gb|AES61237.2|/0/chromatin remodeling complex subunit [Medicago truncatula]	gi|359488065|ref|XM_002263763.2|/1e-117/PREDICTED: Vitis vinifera uncharacterized LOC100244360 (LOC100244360), mRNA	sp|A4PBL4|RAD54_ORYSJ/5e-61/DNA repair and recombination protein RAD54 OS=Oryza sativa subsp. japonica GN=RAD54 PE=1 SV=1	bdi:100835235/0.0/transcriptional regulator ATRX-like; K10779 transcriptional regulator ATRX [EC:3.6.4.12]	SPAC15A10.03c/1e-56/---	PS51192/15.055/Superfamilies 1 and 2 helicase ATP-binding type-1 domain profile.	-
PAU006428.1	scaffold172	+	RetainedIntron	722995-723070	gi|657404247|gb|AES61237.2|/0/chromatin remodeling complex subunit [Medicago truncatula]	gi|359488065|ref|XM_002263763.2|/1e-117/PREDICTED: Vitis vinifera uncharacterized LOC100244360 (LOC100244360), mRNA	sp|A4PBL4|RAD54_ORYSJ/5e-61/DNA repair and recombination protein RAD54 OS=Oryza sativa subsp. japonica GN=RAD54 PE=1 SV=1	bdi:100835235/0.0/transcriptional regulator ATRX-like; K10779 transcriptional regulator ATRX [EC:3.6.4.12]	SPAC15A10.03c/1e-56/---	PS51192/15.055/Superfamilies 1 and 2 helicase ATP-binding type-1 domain profile.	-
PAU006428.1	scaffold172	+	RetainedIntron	723167-723262	gi|657404247|gb|AES61237.2|/0/chromatin remodeling complex subunit [Medicago truncatula]	gi|359488065|ref|XM_002263763.2|/1e-117/PREDICTED: Vitis vinifera uncharacterized LOC100244360 (LOC100244360), mRNA	sp|A4PBL4|RAD54_ORYSJ/5e-61/DNA repair and recombination protein RAD54 OS=Oryza sativa subsp. japonica GN=RAD54 PE=1 SV=1	bdi:100835235/0.0/transcriptional regulator ATRX-like; K10779 transcriptional regulator ATRX [EC:3.6.4.12]	SPAC15A10.03c/1e-56/---	PS51192/15.055/Superfamilies 1 and 2 helicase ATP-binding type-1 domain profile.	-
PAU006428.1	scaffold172	+	RetainedIntron	723356-723741	gi|657404247|gb|AES61237.2|/0/chromatin remodeling complex subunit [Medicago truncatula]	gi|359488065|ref|XM_002263763.2|/1e-117/PREDICTED: Vitis vinifera uncharacterized LOC100244360 (LOC100244360), mRNA	sp|A4PBL4|RAD54_ORYSJ/5e-61/DNA repair and recombination protein RAD54 OS=Oryza sativa subsp. japonica GN=RAD54 PE=1 SV=1	bdi:100835235/0.0/transcriptional regulator ATRX-like; K10779 transcriptional regulator ATRX [EC:3.6.4.12]	SPAC15A10.03c/1e-56/---	PS51192/15.055/Superfamilies 1 and 2 helicase ATP-binding type-1 domain profile.	-
PAU006428.1	scaffold172	+	RetainedIntron	723933-724015	gi|657404247|gb|AES61237.2|/0/chromatin remodeling complex subunit [Medicago truncatula]	gi|359488065|ref|XM_002263763.2|/1e-117/PREDICTED: Vitis vinifera uncharacterized LOC100244360 (LOC100244360), mRNA	sp|A4PBL4|RAD54_ORYSJ/5e-61/DNA repair and recombination protein RAD54 OS=Oryza sativa subsp. japonica GN=RAD54 PE=1 SV=1	bdi:100835235/0.0/transcriptional regulator ATRX-like; K10779 transcriptional regulator ATRX [EC:3.6.4.12]	SPAC15A10.03c/1e-56/---	PS51192/15.055/Superfamilies 1 and 2 helicase ATP-binding type-1 domain profile.	-
PAU006428.1	scaffold172	+	RetainedIntron	724263-724763	gi|657404247|gb|AES61237.2|/0/chromatin remodeling complex subunit [Medicago truncatula]	gi|359488065|ref|XM_002263763.2|/1e-117/PREDICTED: Vitis vinifera uncharacterized LOC100244360 (LOC100244360), mRNA	sp|A4PBL4|RAD54_ORYSJ/5e-61/DNA repair and recombination protein RAD54 OS=Oryza sativa subsp. japonica GN=RAD54 PE=1 SV=1	bdi:100835235/0.0/transcriptional regulator ATRX-like; K10779 transcriptional regulator ATRX [EC:3.6.4.12]	SPAC15A10.03c/1e-56/---	PS51192/15.055/Superfamilies 1 and 2 helicase ATP-binding type-1 domain profile.	-
PAU006428.1	scaffold172	+	RetainedIntron	724878-726146	gi|657404247|gb|AES61237.2|/0/chromatin remodeling complex subunit [Medicago truncatula]	gi|359488065|ref|XM_002263763.2|/1e-117/PREDICTED: Vitis vinifera uncharacterized LOC100244360 (LOC100244360), mRNA	sp|A4PBL4|RAD54_ORYSJ/5e-61/DNA repair and recombination protein RAD54 OS=Oryza sativa subsp. japonica GN=RAD54 PE=1 SV=1	bdi:100835235/0.0/transcriptional regulator ATRX-like; K10779 transcriptional regulator ATRX [EC:3.6.4.12]	SPAC15A10.03c/1e-56/---	PS51192/15.055/Superfamilies 1 and 2 helicase ATP-binding type-1 domain profile.	-
PAU006428.1	scaffold172	+	RetainedIntron	731829-732230	gi|657404247|gb|AES61237.2|/0/chromatin remodeling complex subunit [Medicago truncatula]	gi|359488065|ref|XM_002263763.2|/1e-117/PREDICTED: Vitis vinifera uncharacterized LOC100244360 (LOC100244360), mRNA	sp|A4PBL4|RAD54_ORYSJ/5e-61/DNA repair and recombination protein RAD54 OS=Oryza sativa subsp. japonica GN=RAD54 PE=1 SV=1	bdi:100835235/0.0/transcriptional regulator ATRX-like; K10779 transcriptional regulator ATRX [EC:3.6.4.12]	SPAC15A10.03c/1e-56/---	PS51192/15.055/Superfamilies 1 and 2 helicase ATP-binding type-1 domain profile.	-
PAU006428.1	scaffold172	+	RetainedIntron	732373-733152	gi|657404247|gb|AES61237.2|/0/chromatin remodeling complex subunit [Medicago truncatula]	gi|359488065|ref|XM_002263763.2|/1e-117/PREDICTED: Vitis vinifera uncharacterized LOC100244360 (LOC100244360), mRNA	sp|A4PBL4|RAD54_ORYSJ/5e-61/DNA repair and recombination protein RAD54 OS=Oryza sativa subsp. japonica GN=RAD54 PE=1 SV=1	bdi:100835235/0.0/transcriptional regulator ATRX-like; K10779 transcriptional regulator ATRX [EC:3.6.4.12]	SPAC15A10.03c/1e-56/---	PS51192/15.055/Superfamilies 1 and 2 helicase ATP-binding type-1 domain profile.	-
PAU006428.1	scaffold172	+	RetainedIntron	735915-736140	gi|657404247|gb|AES61237.2|/0/chromatin remodeling complex subunit [Medicago truncatula]	gi|359488065|ref|XM_002263763.2|/1e-117/PREDICTED: Vitis vinifera uncharacterized LOC100244360 (LOC100244360), mRNA	sp|A4PBL4|RAD54_ORYSJ/5e-61/DNA repair and recombination protein RAD54 OS=Oryza sativa subsp. japonica GN=RAD54 PE=1 SV=1	bdi:100835235/0.0/transcriptional regulator ATRX-like; K10779 transcriptional regulator ATRX [EC:3.6.4.12]	SPAC15A10.03c/1e-56/---	PS51192/15.055/Superfamilies 1 and 2 helicase ATP-binding type-1 domain profile.	-
PAU006428.1	scaffold172	+	RetainedIntron	736368-737135	gi|657404247|gb|AES61237.2|/0/chromatin remodeling complex subunit [Medicago truncatula]	gi|359488065|ref|XM_002263763.2|/1e-117/PREDICTED: Vitis vinifera uncharacterized LOC100244360 (LOC100244360), mRNA	sp|A4PBL4|RAD54_ORYSJ/5e-61/DNA repair and recombination protein RAD54 OS=Oryza sativa subsp. japonica GN=RAD54 PE=1 SV=1	bdi:100835235/0.0/transcriptional regulator ATRX-like; K10779 transcriptional regulator ATRX [EC:3.6.4.12]	SPAC15A10.03c/1e-56/---	PS51192/15.055/Superfamilies 1 and 2 helicase ATP-binding type-1 domain profile.	-
PAU006428.1	scaffold172	+	RetainedIntron	737340-737421	gi|657404247|gb|AES61237.2|/0/chromatin remodeling complex subunit [Medicago truncatula]	gi|359488065|ref|XM_002263763.2|/1e-117/PREDICTED: Vitis vinifera uncharacterized LOC100244360 (LOC100244360), mRNA	sp|A4PBL4|RAD54_ORYSJ/5e-61/DNA repair and recombination protein RAD54 OS=Oryza sativa subsp. japonica GN=RAD54 PE=1 SV=1	bdi:100835235/0.0/transcriptional regulator ATRX-like; K10779 transcriptional regulator ATRX [EC:3.6.4.12]	SPAC15A10.03c/1e-56/---	PS51192/15.055/Superfamilies 1 and 2 helicase ATP-binding type-1 domain profile.	-
PAU006428.1	scaffold172	+	RetainedIntron	737501-737568	gi|657404247|gb|AES61237.2|/0/chromatin remodeling complex subunit [Medicago truncatula]	gi|359488065|ref|XM_002263763.2|/1e-117/PREDICTED: Vitis vinifera uncharacterized LOC100244360 (LOC100244360), mRNA	sp|A4PBL4|RAD54_ORYSJ/5e-61/DNA repair and recombination protein RAD54 OS=Oryza sativa subsp. japonica GN=RAD54 PE=1 SV=1	bdi:100835235/0.0/transcriptional regulator ATRX-like; K10779 transcriptional regulator ATRX [EC:3.6.4.12]	SPAC15A10.03c/1e-56/---	PS51192/15.055/Superfamilies 1 and 2 helicase ATP-binding type-1 domain profile.	-
PAU006428.1	scaffold172	+	RetainedIntron	729479-729549	gi|657404247|gb|AES61237.2|/0/chromatin remodeling complex subunit [Medicago truncatula]	gi|359488065|ref|XM_002263763.2|/1e-117/PREDICTED: Vitis vinifera uncharacterized LOC100244360 (LOC100244360), mRNA	sp|A4PBL4|RAD54_ORYSJ/5e-61/DNA repair and recombination protein RAD54 OS=Oryza sativa subsp. japonica GN=RAD54 PE=1 SV=1	bdi:100835235/0.0/transcriptional regulator ATRX-like; K10779 transcriptional regulator ATRX [EC:3.6.4.12]	SPAC15A10.03c/1e-56/---	PS51192/15.055/Superfamilies 1 and 2 helicase ATP-binding type-1 domain profile.	-
PAU006428.1	scaffold172	+	SkippedExon	722932-722994	723071-723166,723263-723355	723742-723932	gi|657404247|gb|AES61237.2|/0/chromatin remodeling complex subunit [Medicago truncatula]	gi|359488065|ref|XM_002263763.2|/1e-117/PREDICTED: Vitis vinifera uncharacterized LOC100244360 (LOC100244360), mRNA	sp|A4PBL4|RAD54_ORYSJ/5e-61/DNA repair and recombination protein RAD54 OS=Oryza sativa subsp. japonica GN=RAD54 PE=1 SV=1	bdi:100835235/0.0/transcriptional regulator ATRX-like; K10779 transcriptional regulator ATRX [EC:3.6.4.12]	SPAC15A10.03c/1e-56/---	PS51192/15.055/Superfamilies 1 and 2 helicase ATP-binding type-1 domain profile.	-
PAU007058.3	scaffold182	+	A3SS	282891-282968	283084-283203	283099-283203	gi|604332814|gb|EYU37331.1|/3.56116e-153/hypothetical protein MIMGU_mgv1a009024mg [Erythranthe guttata]	gi|225314757|dbj|AK328106.1|/2e-82/Solanum lycopersicum cDNA, clone: LEFL2046L22, HTC in fruit	-	ppp:PHYPADRAFT_186245/5e-109/hypothetical protein; K06085 synovial sarcoma, X breakpoint 2 interacting protein	-	PTHR21736/4.4E-91/--	-
PAU007058.3	scaffold182	+	A5SS	280796-280858	280623-280712	280623-280704	gi|604332814|gb|EYU37331.1|/3.56116e-153/hypothetical protein MIMGU_mgv1a009024mg [Erythranthe guttata]	gi|225314757|dbj|AK328106.1|/2e-82/Solanum lycopersicum cDNA, clone: LEFL2046L22, HTC in fruit	-	ppp:PHYPADRAFT_186245/5e-109/hypothetical protein; K06085 synovial sarcoma, X breakpoint 2 interacting protein	-	PTHR21736/4.4E-91/--	-
PAU007058.3	scaffold182	+	RetainedIntron	279189-280435	gi|604332814|gb|EYU37331.1|/3.56116e-153/hypothetical protein MIMGU_mgv1a009024mg [Erythranthe guttata]	gi|225314757|dbj|AK328106.1|/2e-82/Solanum lycopersicum cDNA, clone: LEFL2046L22, HTC in fruit	-	ppp:PHYPADRAFT_186245/5e-109/hypothetical protein; K06085 synovial sarcoma, X breakpoint 2 interacting protein	-	PTHR21736/4.4E-91/--	-
PAU007058.3	scaffold182	+	RetainedIntron	280533-280622	gi|604332814|gb|EYU37331.1|/3.56116e-153/hypothetical protein MIMGU_mgv1a009024mg [Erythranthe guttata]	gi|225314757|dbj|AK328106.1|/2e-82/Solanum lycopersicum cDNA, clone: LEFL2046L22, HTC in fruit	-	ppp:PHYPADRAFT_186245/5e-109/hypothetical protein; K06085 synovial sarcoma, X breakpoint 2 interacting protein	-	PTHR21736/4.4E-91/--	-
PAU007058.3	scaffold182	+	RetainedIntron	282799-282890	gi|604332814|gb|EYU37331.1|/3.56116e-153/hypothetical protein MIMGU_mgv1a009024mg [Erythranthe guttata]	gi|225314757|dbj|AK328106.1|/2e-82/Solanum lycopersicum cDNA, clone: LEFL2046L22, HTC in fruit	-	ppp:PHYPADRAFT_186245/5e-109/hypothetical protein; K06085 synovial sarcoma, X breakpoint 2 interacting protein	-	PTHR21736/4.4E-91/--	-
PAU007058.3	scaffold182	+	RetainedIntron	283204-283964	gi|604332814|gb|EYU37331.1|/3.56116e-153/hypothetical protein MIMGU_mgv1a009024mg [Erythranthe guttata]	gi|225314757|dbj|AK328106.1|/2e-82/Solanum lycopersicum cDNA, clone: LEFL2046L22, HTC in fruit	-	ppp:PHYPADRAFT_186245/5e-109/hypothetical protein; K06085 synovial sarcoma, X breakpoint 2 interacting protein	-	PTHR21736/4.4E-91/--	-
PAU007058.3	scaffold182	+	RetainedIntron	278717-278869	gi|604332814|gb|EYU37331.1|/3.56116e-153/hypothetical protein MIMGU_mgv1a009024mg [Erythranthe guttata]	gi|225314757|dbj|AK328106.1|/2e-82/Solanum lycopersicum cDNA, clone: LEFL2046L22, HTC in fruit	-	ppp:PHYPADRAFT_186245/5e-109/hypothetical protein; K06085 synovial sarcoma, X breakpoint 2 interacting protein	-	PTHR21736/4.4E-91/--	-
PAU007058.3	scaffold182	+	RetainedIntron	278982-279090	gi|604332814|gb|EYU37331.1|/3.56116e-153/hypothetical protein MIMGU_mgv1a009024mg [Erythranthe guttata]	gi|225314757|dbj|AK328106.1|/2e-82/Solanum lycopersicum cDNA, clone: LEFL2046L22, HTC in fruit	-	ppp:PHYPADRAFT_186245/5e-109/hypothetical protein; K06085 synovial sarcoma, X breakpoint 2 interacting protein	-	PTHR21736/4.4E-91/--	-
PAU007058.3	scaffold182	+	RetainedIntron	280713-280795	gi|604332814|gb|EYU37331.1|/3.56116e-153/hypothetical protein MIMGU_mgv1a009024mg [Erythranthe guttata]	gi|225314757|dbj|AK328106.1|/2e-82/Solanum lycopersicum cDNA, clone: LEFL2046L22, HTC in fruit	-	ppp:PHYPADRAFT_186245/5e-109/hypothetical protein; K06085 synovial sarcoma, X breakpoint 2 interacting protein	-	PTHR21736/4.4E-91/--	-
PAU007058.3	scaffold182	+	RetainedIntron	280859-280981	gi|604332814|gb|EYU37331.1|/3.56116e-153/hypothetical protein MIMGU_mgv1a009024mg [Erythranthe guttata]	gi|225314757|dbj|AK328106.1|/2e-82/Solanum lycopersicum cDNA, clone: LEFL2046L22, HTC in fruit	-	ppp:PHYPADRAFT_186245/5e-109/hypothetical protein; K06085 synovial sarcoma, X breakpoint 2 interacting protein	-	PTHR21736/4.4E-91/--	-
PAU007058.3	scaffold182	+	RetainedIntron	281348-282693	gi|604332814|gb|EYU37331.1|/3.56116e-153/hypothetical protein MIMGU_mgv1a009024mg [Erythranthe guttata]	gi|225314757|dbj|AK328106.1|/2e-82/Solanum lycopersicum cDNA, clone: LEFL2046L22, HTC in fruit	-	ppp:PHYPADRAFT_186245/5e-109/hypothetical protein; K06085 synovial sarcoma, X breakpoint 2 interacting protein	-	PTHR21736/4.4E-91/--	-
PAU007058.3	scaffold182	+	RetainedIntron	282969-283083	gi|604332814|gb|EYU37331.1|/3.56116e-153/hypothetical protein MIMGU_mgv1a009024mg [Erythranthe guttata]	gi|225314757|dbj|AK328106.1|/2e-82/Solanum lycopersicum cDNA, clone: LEFL2046L22, HTC in fruit	-	ppp:PHYPADRAFT_186245/5e-109/hypothetical protein; K06085 synovial sarcoma, X breakpoint 2 interacting protein	-	PTHR21736/4.4E-91/--	-
PAU007569.1	scaffold19	+	RetainedIntron	1171497-1172461	gi|604328081|gb|EYU33749.1|/4.05195e-142/hypothetical protein MIMGU_mgv1a010692mg [Erythranthe guttata]	gi|470117454|ref|XM_004294825.1|/4e-25/PREDICTED: Fragaria vesca subsp. vesca high mobility group B protein 10-like (LOC101315415), mRNA	sp|Q9LTT3|HMG10_ARATH/5e-79/High mobility group B protein 10 OS=Arabidopsis thaliana GN=HMGB10 PE=2 SV=1	vvi:100249277/5e-09/FACT complex subunit SSRP1-like; K09272 structure-specific recognition protein 1	YPR052c/3e-07/---	SM01014/9.6E-24/ARID/BRIGHT DNA binding domain	-
PAU007569.1	scaffold19	+	RetainedIntron	1173306-1174213	gi|604328081|gb|EYU33749.1|/4.05195e-142/hypothetical protein MIMGU_mgv1a010692mg [Erythranthe guttata]	gi|470117454|ref|XM_004294825.1|/4e-25/PREDICTED: Fragaria vesca subsp. vesca high mobility group B protein 10-like (LOC101315415), mRNA	sp|Q9LTT3|HMG10_ARATH/5e-79/High mobility group B protein 10 OS=Arabidopsis thaliana GN=HMGB10 PE=2 SV=1	vvi:100249277/5e-09/FACT complex subunit SSRP1-like; K09272 structure-specific recognition protein 1	YPR052c/3e-07/---	SM01014/9.6E-24/ARID/BRIGHT DNA binding domain	-
PAU007663.1	scaffold19	+	A3SS	1925748-1926009	1926875-1927041	1926479-1927041	gi|698531314|ref|XP_009762485.1|/0/PREDICTED: splicing factor, suppressor of white-apricot homolog isoform X1 [Nicotiana sylvestris]	gi|89570855|emb|CT573504.2|/3e-31/Medicago truncatula chromosome 5 clone mth2-178o19, COMPLETE SEQUENCE	sp|Q8H0U8|RH42_ARATH/1e-12/DEAD-box ATP-dependent RNA helicase 42 OS=Arabidopsis thaliana GN=RH42 PE=1 SV=2	gmx:100792927/1e-13/uncharacterized LOC100792927; K13172 serine/arginine repetitive matrix protein 2	SPAC140.02/4e-08/---	PTHR13161:SF15/1.8E-91/--	-
PAU007663.1	scaffold19	+	A3SS	1926875-1927041	1927618-1928427	1927178-1928427	gi|698531314|ref|XP_009762485.1|/0/PREDICTED: splicing factor, suppressor of white-apricot homolog isoform X1 [Nicotiana sylvestris]	gi|89570855|emb|CT573504.2|/3e-31/Medicago truncatula chromosome 5 clone mth2-178o19, COMPLETE SEQUENCE	sp|Q8H0U8|RH42_ARATH/1e-12/DEAD-box ATP-dependent RNA helicase 42 OS=Arabidopsis thaliana GN=RH42 PE=1 SV=2	gmx:100792927/1e-13/uncharacterized LOC100792927; K13172 serine/arginine repetitive matrix protein 2	SPAC140.02/4e-08/---	PTHR13161:SF15/1.8E-91/--	-
PAU007663.1	scaffold19	+	A5SS	1926875-1927041	1925748-1926009	1925748-1926740	gi|698531314|ref|XP_009762485.1|/0/PREDICTED: splicing factor, suppressor of white-apricot homolog isoform X1 [Nicotiana sylvestris]	gi|89570855|emb|CT573504.2|/3e-31/Medicago truncatula chromosome 5 clone mth2-178o19, COMPLETE SEQUENCE	sp|Q8H0U8|RH42_ARATH/1e-12/DEAD-box ATP-dependent RNA helicase 42 OS=Arabidopsis thaliana GN=RH42 PE=1 SV=2	gmx:100792927/1e-13/uncharacterized LOC100792927; K13172 serine/arginine repetitive matrix protein 2	SPAC140.02/4e-08/---	PTHR13161:SF15/1.8E-91/--	-
PAU007663.1	scaffold19	+	A5SS	1927618-1928427	1926875-1927041	1926875-1927277	gi|698531314|ref|XP_009762485.1|/0/PREDICTED: splicing factor, suppressor of white-apricot homolog isoform X1 [Nicotiana sylvestris]	gi|89570855|emb|CT573504.2|/3e-31/Medicago truncatula chromosome 5 clone mth2-178o19, COMPLETE SEQUENCE	sp|Q8H0U8|RH42_ARATH/1e-12/DEAD-box ATP-dependent RNA helicase 42 OS=Arabidopsis thaliana GN=RH42 PE=1 SV=2	gmx:100792927/1e-13/uncharacterized LOC100792927; K13172 serine/arginine repetitive matrix protein 2	SPAC140.02/4e-08/---	PTHR13161:SF15/1.8E-91/--	-
PAU007663.1	scaffold19	+	RetainedIntron	1926010-1926874	gi|698531314|ref|XP_009762485.1|/0/PREDICTED: splicing factor, suppressor of white-apricot homolog isoform X1 [Nicotiana sylvestris]	gi|89570855|emb|CT573504.2|/3e-31/Medicago truncatula chromosome 5 clone mth2-178o19, COMPLETE SEQUENCE	sp|Q8H0U8|RH42_ARATH/1e-12/DEAD-box ATP-dependent RNA helicase 42 OS=Arabidopsis thaliana GN=RH42 PE=1 SV=2	gmx:100792927/1e-13/uncharacterized LOC100792927; K13172 serine/arginine repetitive matrix protein 2	SPAC140.02/4e-08/---	PTHR13161:SF15/1.8E-91/--	-
PAU007663.1	scaffold19	+	RetainedIntron	1927042-1927617	gi|698531314|ref|XP_009762485.1|/0/PREDICTED: splicing factor, suppressor of white-apricot homolog isoform X1 [Nicotiana sylvestris]	gi|89570855|emb|CT573504.2|/3e-31/Medicago truncatula chromosome 5 clone mth2-178o19, COMPLETE SEQUENCE	sp|Q8H0U8|RH42_ARATH/1e-12/DEAD-box ATP-dependent RNA helicase 42 OS=Arabidopsis thaliana GN=RH42 PE=1 SV=2	gmx:100792927/1e-13/uncharacterized LOC100792927; K13172 serine/arginine repetitive matrix protein 2	SPAC140.02/4e-08/---	PTHR13161:SF15/1.8E-91/--	-
PAU007663.1	scaffold19	+	RetainedIntron	1928428-1929253	gi|698531314|ref|XP_009762485.1|/0/PREDICTED: splicing factor, suppressor of white-apricot homolog isoform X1 [Nicotiana sylvestris]	gi|89570855|emb|CT573504.2|/3e-31/Medicago truncatula chromosome 5 clone mth2-178o19, COMPLETE SEQUENCE	sp|Q8H0U8|RH42_ARATH/1e-12/DEAD-box ATP-dependent RNA helicase 42 OS=Arabidopsis thaliana GN=RH42 PE=1 SV=2	gmx:100792927/1e-13/uncharacterized LOC100792927; K13172 serine/arginine repetitive matrix protein 2	SPAC140.02/4e-08/---	PTHR13161:SF15/1.8E-91/--	-
PAU009403.1	scaffold22	-	RetainedIntron	1862505-1862580	gi|604315285|gb|EYU27991.1|/9.37855e-99/hypothetical protein MIMGU_mgv1a010699mg [Erythranthe guttata]	gi|349705899|emb|FQ384438.1|/1e-42/Vitis vinifera clone SS0AAG1YI08	sp|Q84UC7|BAC1_ARATH/2e-79/Mitochondrial arginine transporter BAC1 OS=Arabidopsis thaliana GN=BAC1 PE=1 SV=1	vvi:100255452/3e-90/mitochondrial substrate carrier family protein S-like; K15109 solute carrier family 25 (mitochondrial carnitine/acylcarnitine transporter), member 20/29	-	PTHR24089/2.7E-68/--	-
PAU009403.1	scaffold22	-	RetainedIntron	1862680-1862746	gi|604315285|gb|EYU27991.1|/9.37855e-99/hypothetical protein MIMGU_mgv1a010699mg [Erythranthe guttata]	gi|349705899|emb|FQ384438.1|/1e-42/Vitis vinifera clone SS0AAG1YI08	sp|Q84UC7|BAC1_ARATH/2e-79/Mitochondrial arginine transporter BAC1 OS=Arabidopsis thaliana GN=BAC1 PE=1 SV=1	vvi:100255452/3e-90/mitochondrial substrate carrier family protein S-like; K15109 solute carrier family 25 (mitochondrial carnitine/acylcarnitine transporter), member 20/29	-	PTHR24089/2.7E-68/--	-
PAU009403.1	scaffold22	-	RetainedIntron	1862852-1863027	gi|604315285|gb|EYU27991.1|/9.37855e-99/hypothetical protein MIMGU_mgv1a010699mg [Erythranthe guttata]	gi|349705899|emb|FQ384438.1|/1e-42/Vitis vinifera clone SS0AAG1YI08	sp|Q84UC7|BAC1_ARATH/2e-79/Mitochondrial arginine transporter BAC1 OS=Arabidopsis thaliana GN=BAC1 PE=1 SV=1	vvi:100255452/3e-90/mitochondrial substrate carrier family protein S-like; K15109 solute carrier family 25 (mitochondrial carnitine/acylcarnitine transporter), member 20/29	-	PTHR24089/2.7E-68/--	-
PAU009950.2	scaffold228	+	A3SS	644327-644529	646176-646520	646199-646520	gi|604305346|gb|EYU24490.1|/0/hypothetical protein MIMGU_mgv1a000416mg [Erythranthe guttata]	gi|359486550|ref|XM_002275610.2|/0.0/PREDICTED: Vitis vinifera regulator of nonsense transcripts 2-like (LOC100258101), mRNA	sp|F4IUX6|RENT2_ARATH/0.0/Regulator of nonsense transcripts UPF2 OS=Arabidopsis thaliana GN=UPF2 PE=2 SV=1	gmx:100786092/0.0/regulator of nonsense transcripts 2-like; K14327 regulator of nonsense transcripts 2	-	PTHR12839/0.0/--	-
PAU009950.2	scaffold228	+	RetainedIntron	644530-646175	gi|604305346|gb|EYU24490.1|/0/hypothetical protein MIMGU_mgv1a000416mg [Erythranthe guttata]	gi|359486550|ref|XM_002275610.2|/0.0/PREDICTED: Vitis vinifera regulator of nonsense transcripts 2-like (LOC100258101), mRNA	sp|F4IUX6|RENT2_ARATH/0.0/Regulator of nonsense transcripts UPF2 OS=Arabidopsis thaliana GN=UPF2 PE=2 SV=1	gmx:100786092/0.0/regulator of nonsense transcripts 2-like; K14327 regulator of nonsense transcripts 2	-	PTHR12839/0.0/--	-
PAU009950.2	scaffold228	+	RetainedIntron	646521-647176	gi|604305346|gb|EYU24490.1|/0/hypothetical protein MIMGU_mgv1a000416mg [Erythranthe guttata]	gi|359486550|ref|XM_002275610.2|/0.0/PREDICTED: Vitis vinifera regulator of nonsense transcripts 2-like (LOC100258101), mRNA	sp|F4IUX6|RENT2_ARATH/0.0/Regulator of nonsense transcripts UPF2 OS=Arabidopsis thaliana GN=UPF2 PE=2 SV=1	gmx:100786092/0.0/regulator of nonsense transcripts 2-like; K14327 regulator of nonsense transcripts 2	-	PTHR12839/0.0/--	-
PAU009950.2	scaffold228	+	RetainedIntron	647917-647999	gi|604305346|gb|EYU24490.1|/0/hypothetical protein MIMGU_mgv1a000416mg [Erythranthe guttata]	gi|359486550|ref|XM_002275610.2|/0.0/PREDICTED: Vitis vinifera regulator of nonsense transcripts 2-like (LOC100258101), mRNA	sp|F4IUX6|RENT2_ARATH/0.0/Regulator of nonsense transcripts UPF2 OS=Arabidopsis thaliana GN=UPF2 PE=2 SV=1	gmx:100786092/0.0/regulator of nonsense transcripts 2-like; K14327 regulator of nonsense transcripts 2	-	PTHR12839/0.0/--	-
PAU009950.2	scaffold228	+	RetainedIntron	649538-649957	gi|604305346|gb|EYU24490.1|/0/hypothetical protein MIMGU_mgv1a000416mg [Erythranthe guttata]	gi|359486550|ref|XM_002275610.2|/0.0/PREDICTED: Vitis vinifera regulator of nonsense transcripts 2-like (LOC100258101), mRNA	sp|F4IUX6|RENT2_ARATH/0.0/Regulator of nonsense transcripts UPF2 OS=Arabidopsis thaliana GN=UPF2 PE=2 SV=1	gmx:100786092/0.0/regulator of nonsense transcripts 2-like; K14327 regulator of nonsense transcripts 2	-	PTHR12839/0.0/--	-
PAU009950.2	scaffold228	+	RetainedIntron	650210-650291	gi|604305346|gb|EYU24490.1|/0/hypothetical protein MIMGU_mgv1a000416mg [Erythranthe guttata]	gi|359486550|ref|XM_002275610.2|/0.0/PREDICTED: Vitis vinifera regulator of nonsense transcripts 2-like (LOC100258101), mRNA	sp|F4IUX6|RENT2_ARATH/0.0/Regulator of nonsense transcripts UPF2 OS=Arabidopsis thaliana GN=UPF2 PE=2 SV=1	gmx:100786092/0.0/regulator of nonsense transcripts 2-like; K14327 regulator of nonsense transcripts 2	-	PTHR12839/0.0/--	-
PAU009950.2	scaffold228	+	RetainedIntron	650511-651772	gi|604305346|gb|EYU24490.1|/0/hypothetical protein MIMGU_mgv1a000416mg [Erythranthe guttata]	gi|359486550|ref|XM_002275610.2|/0.0/PREDICTED: Vitis vinifera regulator of nonsense transcripts 2-like (LOC100258101), mRNA	sp|F4IUX6|RENT2_ARATH/0.0/Regulator of nonsense transcripts UPF2 OS=Arabidopsis thaliana GN=UPF2 PE=2 SV=1	gmx:100786092/0.0/regulator of nonsense transcripts 2-like; K14327 regulator of nonsense transcripts 2	-	PTHR12839/0.0/--	-
PAU009950.2	scaffold228	+	RetainedIntron	651944-652831	gi|604305346|gb|EYU24490.1|/0/hypothetical protein MIMGU_mgv1a000416mg [Erythranthe guttata]	gi|359486550|ref|XM_002275610.2|/0.0/PREDICTED: Vitis vinifera regulator of nonsense transcripts 2-like (LOC100258101), mRNA	sp|F4IUX6|RENT2_ARATH/0.0/Regulator of nonsense transcripts UPF2 OS=Arabidopsis thaliana GN=UPF2 PE=2 SV=1	gmx:100786092/0.0/regulator of nonsense transcripts 2-like; K14327 regulator of nonsense transcripts 2	-	PTHR12839/0.0/--	-
PAU009950.2	scaffold228	+	RetainedIntron	653018-654372	gi|604305346|gb|EYU24490.1|/0/hypothetical protein MIMGU_mgv1a000416mg [Erythranthe guttata]	gi|359486550|ref|XM_002275610.2|/0.0/PREDICTED: Vitis vinifera regulator of nonsense transcripts 2-like (LOC100258101), mRNA	sp|F4IUX6|RENT2_ARATH/0.0/Regulator of nonsense transcripts UPF2 OS=Arabidopsis thaliana GN=UPF2 PE=2 SV=1	gmx:100786092/0.0/regulator of nonsense transcripts 2-like; K14327 regulator of nonsense transcripts 2	-	PTHR12839/0.0/--	-
PAU009950.2	scaffold228	+	A3SS	647740-647916	648000-648081	648026-648081	gi|604305346|gb|EYU24490.1|/0/hypothetical protein MIMGU_mgv1a000416mg [Erythranthe guttata]	gi|359486550|ref|XM_002275610.2|/0.0/PREDICTED: Vitis vinifera regulator of nonsense transcripts 2-like (LOC100258101), mRNA	sp|F4IUX6|RENT2_ARATH/0.0/Regulator of nonsense transcripts UPF2 OS=Arabidopsis thaliana GN=UPF2 PE=2 SV=1	gmx:100786092/0.0/regulator of nonsense transcripts 2-like; K14327 regulator of nonsense transcripts 2	-	PTHR12839/0.0/--	-
PAU009950.2	scaffold228	+	A3SS	651773-651943	652832-653017	652854-653017	gi|604305346|gb|EYU24490.1|/0/hypothetical protein MIMGU_mgv1a000416mg [Erythranthe guttata]	gi|359486550|ref|XM_002275610.2|/0.0/PREDICTED: Vitis vinifera regulator of nonsense transcripts 2-like (LOC100258101), mRNA	sp|F4IUX6|RENT2_ARATH/0.0/Regulator of nonsense transcripts UPF2 OS=Arabidopsis thaliana GN=UPF2 PE=2 SV=1	gmx:100786092/0.0/regulator of nonsense transcripts 2-like; K14327 regulator of nonsense transcripts 2	-	PTHR12839/0.0/--	-
PAU009950.2	scaffold228	+	A5SS	647740-647916	647417-647544	647417-647514	gi|604305346|gb|EYU24490.1|/0/hypothetical protein MIMGU_mgv1a000416mg [Erythranthe guttata]	gi|359486550|ref|XM_002275610.2|/0.0/PREDICTED: Vitis vinifera regulator of nonsense transcripts 2-like (LOC100258101), mRNA	sp|F4IUX6|RENT2_ARATH/0.0/Regulator of nonsense transcripts UPF2 OS=Arabidopsis thaliana GN=UPF2 PE=2 SV=1	gmx:100786092/0.0/regulator of nonsense transcripts 2-like; K14327 regulator of nonsense transcripts 2	-	PTHR12839/0.0/--	-
PAU009950.2	scaffold228	+	RetainedIntron	642097-642453	gi|604305346|gb|EYU24490.1|/0/hypothetical protein MIMGU_mgv1a000416mg [Erythranthe guttata]	gi|359486550|ref|XM_002275610.2|/0.0/PREDICTED: Vitis vinifera regulator of nonsense transcripts 2-like (LOC100258101), mRNA	sp|F4IUX6|RENT2_ARATH/0.0/Regulator of nonsense transcripts UPF2 OS=Arabidopsis thaliana GN=UPF2 PE=2 SV=1	gmx:100786092/0.0/regulator of nonsense transcripts 2-like; K14327 regulator of nonsense transcripts 2	-	PTHR12839/0.0/--	-
PAU009950.2	scaffold228	+	RetainedIntron	642542-644326	gi|604305346|gb|EYU24490.1|/0/hypothetical protein MIMGU_mgv1a000416mg [Erythranthe guttata]	gi|359486550|ref|XM_002275610.2|/0.0/PREDICTED: Vitis vinifera regulator of nonsense transcripts 2-like (LOC100258101), mRNA	sp|F4IUX6|RENT2_ARATH/0.0/Regulator of nonsense transcripts UPF2 OS=Arabidopsis thaliana GN=UPF2 PE=2 SV=1	gmx:100786092/0.0/regulator of nonsense transcripts 2-like; K14327 regulator of nonsense transcripts 2	-	PTHR12839/0.0/--	-
PAU009950.2	scaffold228	+	RetainedIntron	647282-647416	gi|604305346|gb|EYU24490.1|/0/hypothetical protein MIMGU_mgv1a000416mg [Erythranthe guttata]	gi|359486550|ref|XM_002275610.2|/0.0/PREDICTED: Vitis vinifera regulator of nonsense transcripts 2-like (LOC100258101), mRNA	sp|F4IUX6|RENT2_ARATH/0.0/Regulator of nonsense transcripts UPF2 OS=Arabidopsis thaliana GN=UPF2 PE=2 SV=1	gmx:100786092/0.0/regulator of nonsense transcripts 2-like; K14327 regulator of nonsense transcripts 2	-	PTHR12839/0.0/--	-
PAU009950.2	scaffold228	+	RetainedIntron	648082-648777	gi|604305346|gb|EYU24490.1|/0/hypothetical protein MIMGU_mgv1a000416mg [Erythranthe guttata]	gi|359486550|ref|XM_002275610.2|/0.0/PREDICTED: Vitis vinifera regulator of nonsense transcripts 2-like (LOC100258101), mRNA	sp|F4IUX6|RENT2_ARATH/0.0/Regulator of nonsense transcripts UPF2 OS=Arabidopsis thaliana GN=UPF2 PE=2 SV=1	gmx:100786092/0.0/regulator of nonsense transcripts 2-like; K14327 regulator of nonsense transcripts 2	-	PTHR12839/0.0/--	-
PAU009950.2	scaffold228	+	RetainedIntron	649045-649152	gi|604305346|gb|EYU24490.1|/0/hypothetical protein MIMGU_mgv1a000416mg [Erythranthe guttata]	gi|359486550|ref|XM_002275610.2|/0.0/PREDICTED: Vitis vinifera regulator of nonsense transcripts 2-like (LOC100258101), mRNA	sp|F4IUX6|RENT2_ARATH/0.0/Regulator of nonsense transcripts UPF2 OS=Arabidopsis thaliana GN=UPF2 PE=2 SV=1	gmx:100786092/0.0/regulator of nonsense transcripts 2-like; K14327 regulator of nonsense transcripts 2	-	PTHR12839/0.0/--	-
PAU009950.2	scaffold228	+	RetainedIntron	649351-649435	gi|604305346|gb|EYU24490.1|/0/hypothetical protein MIMGU_mgv1a000416mg [Erythranthe guttata]	gi|359486550|ref|XM_002275610.2|/0.0/PREDICTED: Vitis vinifera regulator of nonsense transcripts 2-like (LOC100258101), mRNA	sp|F4IUX6|RENT2_ARATH/0.0/Regulator of nonsense transcripts UPF2 OS=Arabidopsis thaliana GN=UPF2 PE=2 SV=1	gmx:100786092/0.0/regulator of nonsense transcripts 2-like; K14327 regulator of nonsense transcripts 2	-	PTHR12839/0.0/--	-
PAU010475.1	scaffold240	-	A3SS	50470-50548	50243-50358	50243-50353	gi|698542573|ref|XP_009766453.1|/1.93303e-172/PREDICTED: outer envelope protein 80, chloroplastic [Nicotiana sylvestris]	gi|225462435|ref|XM_002264400.1|/1e-112/PREDICTED: Vitis vinifera outer envelope protein of 80 kDa, chloroplastic-like (LOC100263991), mRNA	sp|Q9C5J8|OEP80_ARATH/5e-65/Outer envelope protein 80, chloroplastic OS=Arabidopsis thaliana GN=OEP80 PE=2 SV=1	osa:4328615/5e-63/Os02g0196300; K07277 outer membrane protein	alr4893/1e-30/---	PTHR12815:SF10/1.6E-195/--	-
PAU010475.1	scaffold240	-	RetainedIntron	46414-47746	gi|698542573|ref|XP_009766453.1|/1.93303e-172/PREDICTED: outer envelope protein 80, chloroplastic [Nicotiana sylvestris]	gi|225462435|ref|XM_002264400.1|/1e-112/PREDICTED: Vitis vinifera outer envelope protein of 80 kDa, chloroplastic-like (LOC100263991), mRNA	sp|Q9C5J8|OEP80_ARATH/5e-65/Outer envelope protein 80, chloroplastic OS=Arabidopsis thaliana GN=OEP80 PE=2 SV=1	osa:4328615/5e-63/Os02g0196300; K07277 outer membrane protein	alr4893/1e-30/---	PTHR12815:SF10/1.6E-195/--	-
PAU010475.1	scaffold240	-	RetainedIntron	47817-49524	gi|698542573|ref|XP_009766453.1|/1.93303e-172/PREDICTED: outer envelope protein 80, chloroplastic [Nicotiana sylvestris]	gi|225462435|ref|XM_002264400.1|/1e-112/PREDICTED: Vitis vinifera outer envelope protein of 80 kDa, chloroplastic-like (LOC100263991), mRNA	sp|Q9C5J8|OEP80_ARATH/5e-65/Outer envelope protein 80, chloroplastic OS=Arabidopsis thaliana GN=OEP80 PE=2 SV=1	osa:4328615/5e-63/Os02g0196300; K07277 outer membrane protein	alr4893/1e-30/---	PTHR12815:SF10/1.6E-195/--	-
PAU010475.1	scaffold240	-	RetainedIntron	49673-50242	gi|698542573|ref|XP_009766453.1|/1.93303e-172/PREDICTED: outer envelope protein 80, chloroplastic [Nicotiana sylvestris]	gi|225462435|ref|XM_002264400.1|/1e-112/PREDICTED: Vitis vinifera outer envelope protein of 80 kDa, chloroplastic-like (LOC100263991), mRNA	sp|Q9C5J8|OEP80_ARATH/5e-65/Outer envelope protein 80, chloroplastic OS=Arabidopsis thaliana GN=OEP80 PE=2 SV=1	osa:4328615/5e-63/Os02g0196300; K07277 outer membrane protein	alr4893/1e-30/---	PTHR12815:SF10/1.6E-195/--	-
PAU010475.1	scaffold240	-	RetainedIntron	50359-50469	gi|698542573|ref|XP_009766453.1|/1.93303e-172/PREDICTED: outer envelope protein 80, chloroplastic [Nicotiana sylvestris]	gi|225462435|ref|XM_002264400.1|/1e-112/PREDICTED: Vitis vinifera outer envelope protein of 80 kDa, chloroplastic-like (LOC100263991), mRNA	sp|Q9C5J8|OEP80_ARATH/5e-65/Outer envelope protein 80, chloroplastic OS=Arabidopsis thaliana GN=OEP80 PE=2 SV=1	osa:4328615/5e-63/Os02g0196300; K07277 outer membrane protein	alr4893/1e-30/---	PTHR12815:SF10/1.6E-195/--	-
PAU010475.1	scaffold240	-	RetainedIntron	50549-50630	gi|698542573|ref|XP_009766453.1|/1.93303e-172/PREDICTED: outer envelope protein 80, chloroplastic [Nicotiana sylvestris]	gi|225462435|ref|XM_002264400.1|/1e-112/PREDICTED: Vitis vinifera outer envelope protein of 80 kDa, chloroplastic-like (LOC100263991), mRNA	sp|Q9C5J8|OEP80_ARATH/5e-65/Outer envelope protein 80, chloroplastic OS=Arabidopsis thaliana GN=OEP80 PE=2 SV=1	osa:4328615/5e-63/Os02g0196300; K07277 outer membrane protein	alr4893/1e-30/---	PTHR12815:SF10/1.6E-195/--	-
PAU010475.1	scaffold240	-	RetainedIntron	50702-50796	gi|698542573|ref|XP_009766453.1|/1.93303e-172/PREDICTED: outer envelope protein 80, chloroplastic [Nicotiana sylvestris]	gi|225462435|ref|XM_002264400.1|/1e-112/PREDICTED: Vitis vinifera outer envelope protein of 80 kDa, chloroplastic-like (LOC100263991), mRNA	sp|Q9C5J8|OEP80_ARATH/5e-65/Outer envelope protein 80, chloroplastic OS=Arabidopsis thaliana GN=OEP80 PE=2 SV=1	osa:4328615/5e-63/Os02g0196300; K07277 outer membrane protein	alr4893/1e-30/---	PTHR12815:SF10/1.6E-195/--	-
PAU010475.1	scaffold240	-	RetainedIntron	50956-51521	gi|698542573|ref|XP_009766453.1|/1.93303e-172/PREDICTED: outer envelope protein 80, chloroplastic [Nicotiana sylvestris]	gi|225462435|ref|XM_002264400.1|/1e-112/PREDICTED: Vitis vinifera outer envelope protein of 80 kDa, chloroplastic-like (LOC100263991), mRNA	sp|Q9C5J8|OEP80_ARATH/5e-65/Outer envelope protein 80, chloroplastic OS=Arabidopsis thaliana GN=OEP80 PE=2 SV=1	osa:4328615/5e-63/Os02g0196300; K07277 outer membrane protein	alr4893/1e-30/---	PTHR12815:SF10/1.6E-195/--	-
PAU010475.1	scaffold240	-	RetainedIntron	51667-51748	gi|698542573|ref|XP_009766453.1|/1.93303e-172/PREDICTED: outer envelope protein 80, chloroplastic [Nicotiana sylvestris]	gi|225462435|ref|XM_002264400.1|/1e-112/PREDICTED: Vitis vinifera outer envelope protein of 80 kDa, chloroplastic-like (LOC100263991), mRNA	sp|Q9C5J8|OEP80_ARATH/5e-65/Outer envelope protein 80, chloroplastic OS=Arabidopsis thaliana GN=OEP80 PE=2 SV=1	osa:4328615/5e-63/Os02g0196300; K07277 outer membrane protein	alr4893/1e-30/---	PTHR12815:SF10/1.6E-195/--	-
PAU010475.1	scaffold240	-	RetainedIntron	51791-51895	gi|698542573|ref|XP_009766453.1|/1.93303e-172/PREDICTED: outer envelope protein 80, chloroplastic [Nicotiana sylvestris]	gi|225462435|ref|XM_002264400.1|/1e-112/PREDICTED: Vitis vinifera outer envelope protein of 80 kDa, chloroplastic-like (LOC100263991), mRNA	sp|Q9C5J8|OEP80_ARATH/5e-65/Outer envelope protein 80, chloroplastic OS=Arabidopsis thaliana GN=OEP80 PE=2 SV=1	osa:4328615/5e-63/Os02g0196300; K07277 outer membrane protein	alr4893/1e-30/---	PTHR12815:SF10/1.6E-195/--	-
PAU010894.1	scaffold25	-	A5SS	1371558-1371608	1371700-1371785	1371683-1371785	gi|604320115|gb|EYU31238.1|/0/hypothetical protein MIMGU_mgv1a004965mg [Erythranthe guttata]	gi|502106308|ref|XM_004492855.1|/8e-27/PREDICTED: Cicer arietinum cysteine protease ATG4-like (LOC101502836), transcript variant X3, mRNA	sp|Q9M1Y0|ATG4B_ARATH/1e-121/Cysteine protease ATG4b OS=Arabidopsis thaliana GN=ATG4B PE=1 SV=1	vvi:100255545/1e-135/cysteine protease ATG4-like; K08342 autophagy-related protein 4 [EC:3.4.22.-]	-	PTHR22624/1.6E-101/--	-
PAU010894.1	scaffold25	-	RetainedIntron	1371437-1371557	gi|604320115|gb|EYU31238.1|/0/hypothetical protein MIMGU_mgv1a004965mg [Erythranthe guttata]	gi|502106308|ref|XM_004492855.1|/8e-27/PREDICTED: Cicer arietinum cysteine protease ATG4-like (LOC101502836), transcript variant X3, mRNA	sp|Q9M1Y0|ATG4B_ARATH/1e-121/Cysteine protease ATG4b OS=Arabidopsis thaliana GN=ATG4B PE=1 SV=1	vvi:100255545/1e-135/cysteine protease ATG4-like; K08342 autophagy-related protein 4 [EC:3.4.22.-]	-	PTHR22624/1.6E-101/--	-
PAU010894.1	scaffold25	-	RetainedIntron	1371609-1371699	gi|604320115|gb|EYU31238.1|/0/hypothetical protein MIMGU_mgv1a004965mg [Erythranthe guttata]	gi|502106308|ref|XM_004492855.1|/8e-27/PREDICTED: Cicer arietinum cysteine protease ATG4-like (LOC101502836), transcript variant X3, mRNA	sp|Q9M1Y0|ATG4B_ARATH/1e-121/Cysteine protease ATG4b OS=Arabidopsis thaliana GN=ATG4B PE=1 SV=1	vvi:100255545/1e-135/cysteine protease ATG4-like; K08342 autophagy-related protein 4 [EC:3.4.22.-]	-	PTHR22624/1.6E-101/--	-
PAU010894.1	scaffold25	-	RetainedIntron	1371786-1371876	gi|604320115|gb|EYU31238.1|/0/hypothetical protein MIMGU_mgv1a004965mg [Erythranthe guttata]	gi|502106308|ref|XM_004492855.1|/8e-27/PREDICTED: Cicer arietinum cysteine protease ATG4-like (LOC101502836), transcript variant X3, mRNA	sp|Q9M1Y0|ATG4B_ARATH/1e-121/Cysteine protease ATG4b OS=Arabidopsis thaliana GN=ATG4B PE=1 SV=1	vvi:100255545/1e-135/cysteine protease ATG4-like; K08342 autophagy-related protein 4 [EC:3.4.22.-]	-	PTHR22624/1.6E-101/--	-
PAU011364.3	scaffold26	+	RetainedIntron	1134450-1134533	gi|604330297|gb|EYU35362.1|/0/hypothetical protein MIMGU_mgv1a001676mg [Erythranthe guttata]	gi|358030450|gb|AC240222.7|/0.0/Solanum lycopersicum strain Heinz 1706 chromosome 1 clone sle-46a2 map 1, complete sequence	-	vvi:100244778/3e-15/ubiquitin-conjugating enzyme E2 22-like; K10583 ubiquitin-conjugating enzyme E2 S [EC:6.3.2.19]	-	PTHR31973/5.0E-196/--	-
PAU011724.1	scaffold267	+	RetainedIntron	400994-402465	gi|604322355|gb|EYU32741.1|/0/hypothetical protein MIMGU_mgv1a006804mg [Erythranthe guttata]	gi|225312568|dbj|AK327108.1|/1e-120/Solanum lycopersicum cDNA, clone: LEFL2021F20, HTC in fruit	sp|Q8H0T9|KTNB1_ARATH/2e-07/Katanin p80 WD40 repeat-containing subunit B1 homolog OS=Arabidopsis thaliana GN=At5g23430 PE=2 SV=3	gmx:100798080/1e-08/WD repeat-containing protein 5-like; K14963 COMPASS component SWD3	all0283_3/3e-11/---	PTHR22847/3.1E-126/--	-
PAU011724.1	scaffold267	+	RetainedIntron	402601-402792	gi|604322355|gb|EYU32741.1|/0/hypothetical protein MIMGU_mgv1a006804mg [Erythranthe guttata]	gi|225312568|dbj|AK327108.1|/1e-120/Solanum lycopersicum cDNA, clone: LEFL2021F20, HTC in fruit	sp|Q8H0T9|KTNB1_ARATH/2e-07/Katanin p80 WD40 repeat-containing subunit B1 homolog OS=Arabidopsis thaliana GN=At5g23430 PE=2 SV=3	gmx:100798080/1e-08/WD repeat-containing protein 5-like; K14963 COMPASS component SWD3	all0283_3/3e-11/---	PTHR22847/3.1E-126/--	-
PAU011724.1	scaffold267	+	RetainedIntron	402904-404386	gi|604322355|gb|EYU32741.1|/0/hypothetical protein MIMGU_mgv1a006804mg [Erythranthe guttata]	gi|225312568|dbj|AK327108.1|/1e-120/Solanum lycopersicum cDNA, clone: LEFL2021F20, HTC in fruit	sp|Q8H0T9|KTNB1_ARATH/2e-07/Katanin p80 WD40 repeat-containing subunit B1 homolog OS=Arabidopsis thaliana GN=At5g23430 PE=2 SV=3	gmx:100798080/1e-08/WD repeat-containing protein 5-like; K14963 COMPASS component SWD3	all0283_3/3e-11/---	PTHR22847/3.1E-126/--	-
PAU011724.1	scaffold267	+	RetainedIntron	404479-404558	gi|604322355|gb|EYU32741.1|/0/hypothetical protein MIMGU_mgv1a006804mg [Erythranthe guttata]	gi|225312568|dbj|AK327108.1|/1e-120/Solanum lycopersicum cDNA, clone: LEFL2021F20, HTC in fruit	sp|Q8H0T9|KTNB1_ARATH/2e-07/Katanin p80 WD40 repeat-containing subunit B1 homolog OS=Arabidopsis thaliana GN=At5g23430 PE=2 SV=3	gmx:100798080/1e-08/WD repeat-containing protein 5-like; K14963 COMPASS component SWD3	all0283_3/3e-11/---	PTHR22847/3.1E-126/--	-
PAU011724.1	scaffold267	+	RetainedIntron	404662-405281	gi|604322355|gb|EYU32741.1|/0/hypothetical protein MIMGU_mgv1a006804mg [Erythranthe guttata]	gi|225312568|dbj|AK327108.1|/1e-120/Solanum lycopersicum cDNA, clone: LEFL2021F20, HTC in fruit	sp|Q8H0T9|KTNB1_ARATH/2e-07/Katanin p80 WD40 repeat-containing subunit B1 homolog OS=Arabidopsis thaliana GN=At5g23430 PE=2 SV=3	gmx:100798080/1e-08/WD repeat-containing protein 5-like; K14963 COMPASS component SWD3	all0283_3/3e-11/---	PTHR22847/3.1E-126/--	-
PAU011724.1	scaffold267	+	RetainedIntron	405369-405882	gi|604322355|gb|EYU32741.1|/0/hypothetical protein MIMGU_mgv1a006804mg [Erythranthe guttata]	gi|225312568|dbj|AK327108.1|/1e-120/Solanum lycopersicum cDNA, clone: LEFL2021F20, HTC in fruit	sp|Q8H0T9|KTNB1_ARATH/2e-07/Katanin p80 WD40 repeat-containing subunit B1 homolog OS=Arabidopsis thaliana GN=At5g23430 PE=2 SV=3	gmx:100798080/1e-08/WD repeat-containing protein 5-like; K14963 COMPASS component SWD3	all0283_3/3e-11/---	PTHR22847/3.1E-126/--	-
PAU011724.1	scaffold267	+	A3SS	402466-402600	402793-402903	402803-402903	gi|604322355|gb|EYU32741.1|/0/hypothetical protein MIMGU_mgv1a006804mg [Erythranthe guttata]	gi|225312568|dbj|AK327108.1|/1e-120/Solanum lycopersicum cDNA, clone: LEFL2021F20, HTC in fruit	sp|Q8H0T9|KTNB1_ARATH/2e-07/Katanin p80 WD40 repeat-containing subunit B1 homolog OS=Arabidopsis thaliana GN=At5g23430 PE=2 SV=3	gmx:100798080/1e-08/WD repeat-containing protein 5-like; K14963 COMPASS component SWD3	all0283_3/3e-11/---	PTHR22847/3.1E-126/--	-
PAU011724.1	scaffold267	+	A3SS	405282-405368	405883-406296	405887-406296	gi|604322355|gb|EYU32741.1|/0/hypothetical protein MIMGU_mgv1a006804mg [Erythranthe guttata]	gi|225312568|dbj|AK327108.1|/1e-120/Solanum lycopersicum cDNA, clone: LEFL2021F20, HTC in fruit	sp|Q8H0T9|KTNB1_ARATH/2e-07/Katanin p80 WD40 repeat-containing subunit B1 homolog OS=Arabidopsis thaliana GN=At5g23430 PE=2 SV=3	gmx:100798080/1e-08/WD repeat-containing protein 5-like; K14963 COMPASS component SWD3	all0283_3/3e-11/---	PTHR22847/3.1E-126/--	-
PAU012900.1	scaffold295	-	A3SS	59881-60515	58775-58877	58775-58881	gi|604334835|gb|EYU38901.1|/1.04624e-177/hypothetical protein MIMGU_mgv1a006323mg [Erythranthe guttata]	gi|349719602|emb|FQ381420.1|/2e-49/Vitis vinifera clone SS0ABP1YK22	sp|Q9M158|STR4_ARATH/3e-143/Rhodanese-like domain-containing protein 4, chloroplastic OS=Arabidopsis thaliana GN=STR4 PE=1 SV=2	-	RP600/4e-06/---	PTHR11177:SF138/3.3E-43/--	-
PAU012900.1	scaffold295	-	RetainedIntron	56170-56463	gi|604334835|gb|EYU38901.1|/1.04624e-177/hypothetical protein MIMGU_mgv1a006323mg [Erythranthe guttata]	gi|349719602|emb|FQ381420.1|/2e-49/Vitis vinifera clone SS0ABP1YK22	sp|Q9M158|STR4_ARATH/3e-143/Rhodanese-like domain-containing protein 4, chloroplastic OS=Arabidopsis thaliana GN=STR4 PE=1 SV=2	-	RP600/4e-06/---	PTHR11177:SF138/3.3E-43/--	-
PAU012900.1	scaffold295	-	RetainedIntron	56710-56873	gi|604334835|gb|EYU38901.1|/1.04624e-177/hypothetical protein MIMGU_mgv1a006323mg [Erythranthe guttata]	gi|349719602|emb|FQ381420.1|/2e-49/Vitis vinifera clone SS0ABP1YK22	sp|Q9M158|STR4_ARATH/3e-143/Rhodanese-like domain-containing protein 4, chloroplastic OS=Arabidopsis thaliana GN=STR4 PE=1 SV=2	-	RP600/4e-06/---	PTHR11177:SF138/3.3E-43/--	-
PAU012900.1	scaffold295	-	RetainedIntron	56955-57692	gi|604334835|gb|EYU38901.1|/1.04624e-177/hypothetical protein MIMGU_mgv1a006323mg [Erythranthe guttata]	gi|349719602|emb|FQ381420.1|/2e-49/Vitis vinifera clone SS0ABP1YK22	sp|Q9M158|STR4_ARATH/3e-143/Rhodanese-like domain-containing protein 4, chloroplastic OS=Arabidopsis thaliana GN=STR4 PE=1 SV=2	-	RP600/4e-06/---	PTHR11177:SF138/3.3E-43/--	-
PAU012900.1	scaffold295	-	RetainedIntron	57768-57852	gi|604334835|gb|EYU38901.1|/1.04624e-177/hypothetical protein MIMGU_mgv1a006323mg [Erythranthe guttata]	gi|349719602|emb|FQ381420.1|/2e-49/Vitis vinifera clone SS0ABP1YK22	sp|Q9M158|STR4_ARATH/3e-143/Rhodanese-like domain-containing protein 4, chloroplastic OS=Arabidopsis thaliana GN=STR4 PE=1 SV=2	-	RP600/4e-06/---	PTHR11177:SF138/3.3E-43/--	-
PAU012900.1	scaffold295	-	RetainedIntron	57928-58614	gi|604334835|gb|EYU38901.1|/1.04624e-177/hypothetical protein MIMGU_mgv1a006323mg [Erythranthe guttata]	gi|349719602|emb|FQ381420.1|/2e-49/Vitis vinifera clone SS0ABP1YK22	sp|Q9M158|STR4_ARATH/3e-143/Rhodanese-like domain-containing protein 4, chloroplastic OS=Arabidopsis thaliana GN=STR4 PE=1 SV=2	-	RP600/4e-06/---	PTHR11177:SF138/3.3E-43/--	-
PAU012900.1	scaffold295	-	RetainedIntron	58702-58774	gi|604334835|gb|EYU38901.1|/1.04624e-177/hypothetical protein MIMGU_mgv1a006323mg [Erythranthe guttata]	gi|349719602|emb|FQ381420.1|/2e-49/Vitis vinifera clone SS0ABP1YK22	sp|Q9M158|STR4_ARATH/3e-143/Rhodanese-like domain-containing protein 4, chloroplastic OS=Arabidopsis thaliana GN=STR4 PE=1 SV=2	-	RP600/4e-06/---	PTHR11177:SF138/3.3E-43/--	-
PAU012900.1	scaffold295	-	RetainedIntron	58878-59880	gi|604334835|gb|EYU38901.1|/1.04624e-177/hypothetical protein MIMGU_mgv1a006323mg [Erythranthe guttata]	gi|349719602|emb|FQ381420.1|/2e-49/Vitis vinifera clone SS0ABP1YK22	sp|Q9M158|STR4_ARATH/3e-143/Rhodanese-like domain-containing protein 4, chloroplastic OS=Arabidopsis thaliana GN=STR4 PE=1 SV=2	-	RP600/4e-06/---	PTHR11177:SF138/3.3E-43/--	-
PAU012900.1	scaffold295	-	SkippedExon	57853-57927	58615-58701	58775-58877	gi|604334835|gb|EYU38901.1|/1.04624e-177/hypothetical protein MIMGU_mgv1a006323mg [Erythranthe guttata]	gi|349719602|emb|FQ381420.1|/2e-49/Vitis vinifera clone SS0ABP1YK22	sp|Q9M158|STR4_ARATH/3e-143/Rhodanese-like domain-containing protein 4, chloroplastic OS=Arabidopsis thaliana GN=STR4 PE=1 SV=2	-	RP600/4e-06/---	PTHR11177:SF138/3.3E-43/--	-
PAU012900.1	scaffold295	-	A3SS	58615-58701	57853-57927	57853-57924	gi|604334835|gb|EYU38901.1|/1.04624e-177/hypothetical protein MIMGU_mgv1a006323mg [Erythranthe guttata]	gi|349719602|emb|FQ381420.1|/2e-49/Vitis vinifera clone SS0ABP1YK22	sp|Q9M158|STR4_ARATH/3e-143/Rhodanese-like domain-containing protein 4, chloroplastic OS=Arabidopsis thaliana GN=STR4 PE=1 SV=2	-	RP600/4e-06/---	PTHR11177:SF138/3.3E-43/--	-
PAU012900.1	scaffold295	-	A3SS	58615-58701	57853-57927	57853-57887	gi|604334835|gb|EYU38901.1|/1.04624e-177/hypothetical protein MIMGU_mgv1a006323mg [Erythranthe guttata]	gi|349719602|emb|FQ381420.1|/2e-49/Vitis vinifera clone SS0ABP1YK22	sp|Q9M158|STR4_ARATH/3e-143/Rhodanese-like domain-containing protein 4, chloroplastic OS=Arabidopsis thaliana GN=STR4 PE=1 SV=2	-	RP600/4e-06/---	PTHR11177:SF138/3.3E-43/--	-
PAU012900.1	scaffold295	-	A5SS	56464-56709	56874-56954	56866-56954	gi|604334835|gb|EYU38901.1|/1.04624e-177/hypothetical protein MIMGU_mgv1a006323mg [Erythranthe guttata]	gi|349719602|emb|FQ381420.1|/2e-49/Vitis vinifera clone SS0ABP1YK22	sp|Q9M158|STR4_ARATH/3e-143/Rhodanese-like domain-containing protein 4, chloroplastic OS=Arabidopsis thaliana GN=STR4 PE=1 SV=2	-	RP600/4e-06/---	PTHR11177:SF138/3.3E-43/--	-
PAU014369.1	scaffold31	-	RetainedIntron	203401-204080	gi|604348323|gb|EYU46478.1|/6.58895e-87/hypothetical protein MIMGU_mgv1a012832mg [Erythranthe guttata]	gi|225318950|dbj|AK323908.1|/6e-29/Solanum lycopersicum cDNA, clone: LEFL1067BF11, HTC in leaf	-	vvi:100258985/7e-74/vesicle transport protein USE1-like; K08507 unconventional SNARE in the endoplasmic reticulum protein 1	-	PTHR13050/1.4E-47/--	-
PAU014369.1	scaffold31	-	RetainedIntron	204154-205018	gi|604348323|gb|EYU46478.1|/6.58895e-87/hypothetical protein MIMGU_mgv1a012832mg [Erythranthe guttata]	gi|225318950|dbj|AK323908.1|/6e-29/Solanum lycopersicum cDNA, clone: LEFL1067BF11, HTC in leaf	-	vvi:100258985/7e-74/vesicle transport protein USE1-like; K08507 unconventional SNARE in the endoplasmic reticulum protein 1	-	PTHR13050/1.4E-47/--	-
PAU014369.1	scaffold31	-	RetainedIntron	205087-205378	gi|604348323|gb|EYU46478.1|/6.58895e-87/hypothetical protein MIMGU_mgv1a012832mg [Erythranthe guttata]	gi|225318950|dbj|AK323908.1|/6e-29/Solanum lycopersicum cDNA, clone: LEFL1067BF11, HTC in leaf	-	vvi:100258985/7e-74/vesicle transport protein USE1-like; K08507 unconventional SNARE in the endoplasmic reticulum protein 1	-	PTHR13050/1.4E-47/--	-
PAU017389.1	scaffold371	+	RetainedIntron	273833-274427	gi|698449330|ref|XP_009773890.1|/1.06045e-28/PREDICTED: ribonuclease 3-like protein 1 isoform X2 [Nicotiana sylvestris]	-	sp|Q9M8N2|RTL1_ARATH/3e-26/Ribonuclease 3-like protein 1 OS=Arabidopsis thaliana GN=RTL1 PE=2 SV=1	pop:POPTR_802171/6e-24/DCL905; dicer-like protein; K11592 endoribonuclease Dicer [EC:3.1.26.-]	-	PTHR12813/1.9E-19/--	-
PAU017435.1	scaffold372	-	RetainedIntron	399091-399797	gi|604315860|gb|EYU28425.1|/0/hypothetical protein MIMGU_mgv1a007237mg [Erythranthe guttata]	gi|470126010|ref|XM_004298941.1|/1e-136/PREDICTED: Fragaria vesca subsp. vesca uncharacterized LOC101315236 (LOC101315236), mRNA	-	-	-	PF03080/2.9E-93/Domain of unknown function (DUF239)	-
PAU017435.1	scaffold372	-	RetainedIntron	399963-400066	gi|604315860|gb|EYU28425.1|/0/hypothetical protein MIMGU_mgv1a007237mg [Erythranthe guttata]	gi|470126010|ref|XM_004298941.1|/1e-136/PREDICTED: Fragaria vesca subsp. vesca uncharacterized LOC101315236 (LOC101315236), mRNA	-	-	-	PF03080/2.9E-93/Domain of unknown function (DUF239)	-
PAU017435.1	scaffold372	-	RetainedIntron	400283-400373	gi|604315860|gb|EYU28425.1|/0/hypothetical protein MIMGU_mgv1a007237mg [Erythranthe guttata]	gi|470126010|ref|XM_004298941.1|/1e-136/PREDICTED: Fragaria vesca subsp. vesca uncharacterized LOC101315236 (LOC101315236), mRNA	-	-	-	PF03080/2.9E-93/Domain of unknown function (DUF239)	-
PAU017435.1	scaffold372	-	RetainedIntron	400461-400632	gi|604315860|gb|EYU28425.1|/0/hypothetical protein MIMGU_mgv1a007237mg [Erythranthe guttata]	gi|470126010|ref|XM_004298941.1|/1e-136/PREDICTED: Fragaria vesca subsp. vesca uncharacterized LOC101315236 (LOC101315236), mRNA	-	-	-	PF03080/2.9E-93/Domain of unknown function (DUF239)	-
PAU018124.1	scaffold39	-	RetainedIntron	616558-616880	gi|697164567|ref|XP_009591091.1|/0/PREDICTED: aminomethyltransferase, mitochondrial [Nicotiana tomentosiformis] &gt;gi|697164569|ref|XP_009591092.1| PREDICTED: aminomethyltransferase, mitochondrial [Nicotiana tomentosiformis]	gi|438253|emb|Z25862.1|/0.0/S.tuberosum mRNA for T subunit of glycine decarboxylase multi-enzyme complex	sp|P54260|GCST_SOLTU/0.0/Aminomethyltransferase, mitochondrial OS=Solanum tuberosum GN=GDCST PE=1 SV=1	vvi:100250401/0.0/aminomethyltransferase, mitochondrial-like; K00605 aminomethyltransferase [EC:2.1.2.10]	SPAC31G5.14/2e-90/---	PF01571/3.1E-65/Aminomethyltransferase folate-binding domain	biological_process:GO:0006546//glycine catabolic process;cellular_component:GO:0005739//mitochondrion;molecular_function:GO:0008483//transaminase activity;GO:0004047//aminomethyltransferase activity;
PAU018124.1	scaffold39	-	RetainedIntron	617000-617832	gi|697164567|ref|XP_009591091.1|/0/PREDICTED: aminomethyltransferase, mitochondrial [Nicotiana tomentosiformis] &gt;gi|697164569|ref|XP_009591092.1| PREDICTED: aminomethyltransferase, mitochondrial [Nicotiana tomentosiformis]	gi|438253|emb|Z25862.1|/0.0/S.tuberosum mRNA for T subunit of glycine decarboxylase multi-enzyme complex	sp|P54260|GCST_SOLTU/0.0/Aminomethyltransferase, mitochondrial OS=Solanum tuberosum GN=GDCST PE=1 SV=1	vvi:100250401/0.0/aminomethyltransferase, mitochondrial-like; K00605 aminomethyltransferase [EC:2.1.2.10]	SPAC31G5.14/2e-90/---	PF01571/3.1E-65/Aminomethyltransferase folate-binding domain	biological_process:GO:0006546//glycine catabolic process;cellular_component:GO:0005739//mitochondrion;molecular_function:GO:0008483//transaminase activity;GO:0004047//aminomethyltransferase activity;
PAU018124.1	scaffold39	-	SkippedExon	616011-616557	616881-616999	617833-618393	gi|697164567|ref|XP_009591091.1|/0/PREDICTED: aminomethyltransferase, mitochondrial [Nicotiana tomentosiformis] &gt;gi|697164569|ref|XP_009591092.1| PREDICTED: aminomethyltransferase, mitochondrial [Nicotiana tomentosiformis]	gi|438253|emb|Z25862.1|/0.0/S.tuberosum mRNA for T subunit of glycine decarboxylase multi-enzyme complex	sp|P54260|GCST_SOLTU/0.0/Aminomethyltransferase, mitochondrial OS=Solanum tuberosum GN=GDCST PE=1 SV=1	vvi:100250401/0.0/aminomethyltransferase, mitochondrial-like; K00605 aminomethyltransferase [EC:2.1.2.10]	SPAC31G5.14/2e-90/---	PF01571/3.1E-65/Aminomethyltransferase folate-binding domain	biological_process:GO:0006546//glycine catabolic process;cellular_component:GO:0005739//mitochondrion;molecular_function:GO:0008483//transaminase activity;GO:0004047//aminomethyltransferase activity;
PAU018164.1	scaffold39	-	RetainedIntron	881626-881732	gi|698562199|ref|XP_009772342.1|/1.34341e-62/PREDICTED: transcription factor ILR3-like [Nicotiana sylvestris]	gi|470148196|ref|XM_004309608.1|/6e-11/PREDICTED: Fragaria vesca subsp. vesca transcription factor ILR3-like (LOC101296164), mRNA	sp|Q9FH37|ILR3_ARATH/3e-43/Transcription factor ILR3 OS=Arabidopsis thaliana GN=ILR3 PE=1 SV=1	-	-	PTHR23042/1.7E-37/--	-
PAU018164.1	scaffold39	-	A3SS	881733-881991	881359-881625	881359-881616	gi|698562199|ref|XP_009772342.1|/1.34341e-62/PREDICTED: transcription factor ILR3-like [Nicotiana sylvestris]	gi|470148196|ref|XM_004309608.1|/6e-11/PREDICTED: Fragaria vesca subsp. vesca transcription factor ILR3-like (LOC101296164), mRNA	sp|Q9FH37|ILR3_ARATH/3e-43/Transcription factor ILR3 OS=Arabidopsis thaliana GN=ILR3 PE=1 SV=1	-	-	PTHR23042/1.7E-37/--	-
PAU018814.3	scaffold401	-	A3SS	72032-72189	71855-71915	71855-71922	gi|702468760|ref|XP_010030071.1|/0/PREDICTED: dynamin-like protein ARC5 [Eucalyptus grandis] &gt;gi|629090776|gb|KCW57029.1| hypothetical protein EUGRSUZ_I02694 [Eucalyptus grandis] &gt;gi|629090777|gb|KCW57030.1| hypothetical protein EUGRSUZ_I02694 [Eucalyptus grandis]	gi|359485991|ref|XM_002266693.2|/0.0/PREDICTED: Vitis vinifera dynamin-like protein ARC5 (LOC100253726), mRNA	sp|Q84N64|ARC5_ARATH/0.0/Dynamin-like protein ARC5 OS=Arabidopsis thaliana GN=ARC5 PE=1 SV=2	osa:4327743/4e-15/Os01g0920400; K01528 dynamin GTPase [EC:3.6.5.5]	YOR211c/2e-11/---	SM00053/1.2E-5/Dynamin, GTPase	-
PAU018814.3	scaffold401	-	A5SS	68000-68161	68438-68779	68717-68779	gi|702468760|ref|XP_010030071.1|/0/PREDICTED: dynamin-like protein ARC5 [Eucalyptus grandis] &gt;gi|629090776|gb|KCW57029.1| hypothetical protein EUGRSUZ_I02694 [Eucalyptus grandis] &gt;gi|629090777|gb|KCW57030.1| hypothetical protein EUGRSUZ_I02694 [Eucalyptus grandis]	gi|359485991|ref|XM_002266693.2|/0.0/PREDICTED: Vitis vinifera dynamin-like protein ARC5 (LOC100253726), mRNA	sp|Q84N64|ARC5_ARATH/0.0/Dynamin-like protein ARC5 OS=Arabidopsis thaliana GN=ARC5 PE=1 SV=2	osa:4327743/4e-15/Os01g0920400; K01528 dynamin GTPase [EC:3.6.5.5]	YOR211c/2e-11/---	SM00053/1.2E-5/Dynamin, GTPase	-
PAU018814.3	scaffold401	-	A5SS	68000-68161	68438-68779	68361-68779	gi|702468760|ref|XP_010030071.1|/0/PREDICTED: dynamin-like protein ARC5 [Eucalyptus grandis] &gt;gi|629090776|gb|KCW57029.1| hypothetical protein EUGRSUZ_I02694 [Eucalyptus grandis] &gt;gi|629090777|gb|KCW57030.1| hypothetical protein EUGRSUZ_I02694 [Eucalyptus grandis]	gi|359485991|ref|XM_002266693.2|/0.0/PREDICTED: Vitis vinifera dynamin-like protein ARC5 (LOC100253726), mRNA	sp|Q84N64|ARC5_ARATH/0.0/Dynamin-like protein ARC5 OS=Arabidopsis thaliana GN=ARC5 PE=1 SV=2	osa:4327743/4e-15/Os01g0920400; K01528 dynamin GTPase [EC:3.6.5.5]	YOR211c/2e-11/---	SM00053/1.2E-5/Dynamin, GTPase	-
PAU018814.3	scaffold401	-	A5SS	78911-79075	79975-80331	79972-80331	gi|702468760|ref|XP_010030071.1|/0/PREDICTED: dynamin-like protein ARC5 [Eucalyptus grandis] &gt;gi|629090776|gb|KCW57029.1| hypothetical protein EUGRSUZ_I02694 [Eucalyptus grandis] &gt;gi|629090777|gb|KCW57030.1| hypothetical protein EUGRSUZ_I02694 [Eucalyptus grandis]	gi|359485991|ref|XM_002266693.2|/0.0/PREDICTED: Vitis vinifera dynamin-like protein ARC5 (LOC100253726), mRNA	sp|Q84N64|ARC5_ARATH/0.0/Dynamin-like protein ARC5 OS=Arabidopsis thaliana GN=ARC5 PE=1 SV=2	osa:4327743/4e-15/Os01g0920400; K01528 dynamin GTPase [EC:3.6.5.5]	YOR211c/2e-11/---	SM00053/1.2E-5/Dynamin, GTPase	-
PAU018814.3	scaffold401	-	RetainedIntron	68162-68437	gi|702468760|ref|XP_010030071.1|/0/PREDICTED: dynamin-like protein ARC5 [Eucalyptus grandis] &gt;gi|629090776|gb|KCW57029.1| hypothetical protein EUGRSUZ_I02694 [Eucalyptus grandis] &gt;gi|629090777|gb|KCW57030.1| hypothetical protein EUGRSUZ_I02694 [Eucalyptus grandis]	gi|359485991|ref|XM_002266693.2|/0.0/PREDICTED: Vitis vinifera dynamin-like protein ARC5 (LOC100253726), mRNA	sp|Q84N64|ARC5_ARATH/0.0/Dynamin-like protein ARC5 OS=Arabidopsis thaliana GN=ARC5 PE=1 SV=2	osa:4327743/4e-15/Os01g0920400; K01528 dynamin GTPase [EC:3.6.5.5]	YOR211c/2e-11/---	SM00053/1.2E-5/Dynamin, GTPase	-
PAU018814.3	scaffold401	-	RetainedIntron	71652-71854	gi|702468760|ref|XP_010030071.1|/0/PREDICTED: dynamin-like protein ARC5 [Eucalyptus grandis] &gt;gi|629090776|gb|KCW57029.1| hypothetical protein EUGRSUZ_I02694 [Eucalyptus grandis] &gt;gi|629090777|gb|KCW57030.1| hypothetical protein EUGRSUZ_I02694 [Eucalyptus grandis]	gi|359485991|ref|XM_002266693.2|/0.0/PREDICTED: Vitis vinifera dynamin-like protein ARC5 (LOC100253726), mRNA	sp|Q84N64|ARC5_ARATH/0.0/Dynamin-like protein ARC5 OS=Arabidopsis thaliana GN=ARC5 PE=1 SV=2	osa:4327743/4e-15/Os01g0920400; K01528 dynamin GTPase [EC:3.6.5.5]	YOR211c/2e-11/---	SM00053/1.2E-5/Dynamin, GTPase	-
PAU018814.3	scaffold401	-	RetainedIntron	73501-75637	gi|702468760|ref|XP_010030071.1|/0/PREDICTED: dynamin-like protein ARC5 [Eucalyptus grandis] &gt;gi|629090776|gb|KCW57029.1| hypothetical protein EUGRSUZ_I02694 [Eucalyptus grandis] &gt;gi|629090777|gb|KCW57030.1| hypothetical protein EUGRSUZ_I02694 [Eucalyptus grandis]	gi|359485991|ref|XM_002266693.2|/0.0/PREDICTED: Vitis vinifera dynamin-like protein ARC5 (LOC100253726), mRNA	sp|Q84N64|ARC5_ARATH/0.0/Dynamin-like protein ARC5 OS=Arabidopsis thaliana GN=ARC5 PE=1 SV=2	osa:4327743/4e-15/Os01g0920400; K01528 dynamin GTPase [EC:3.6.5.5]	YOR211c/2e-11/---	SM00053/1.2E-5/Dynamin, GTPase	-
PAU018814.3	scaffold401	-	RetainedIntron	75702-75940	gi|702468760|ref|XP_010030071.1|/0/PREDICTED: dynamin-like protein ARC5 [Eucalyptus grandis] &gt;gi|629090776|gb|KCW57029.1| hypothetical protein EUGRSUZ_I02694 [Eucalyptus grandis] &gt;gi|629090777|gb|KCW57030.1| hypothetical protein EUGRSUZ_I02694 [Eucalyptus grandis]	gi|359485991|ref|XM_002266693.2|/0.0/PREDICTED: Vitis vinifera dynamin-like protein ARC5 (LOC100253726), mRNA	sp|Q84N64|ARC5_ARATH/0.0/Dynamin-like protein ARC5 OS=Arabidopsis thaliana GN=ARC5 PE=1 SV=2	osa:4327743/4e-15/Os01g0920400; K01528 dynamin GTPase [EC:3.6.5.5]	YOR211c/2e-11/---	SM00053/1.2E-5/Dynamin, GTPase	-
PAU018814.3	scaffold401	-	RetainedIntron	76265-77163	gi|702468760|ref|XP_010030071.1|/0/PREDICTED: dynamin-like protein ARC5 [Eucalyptus grandis] &gt;gi|629090776|gb|KCW57029.1| hypothetical protein EUGRSUZ_I02694 [Eucalyptus grandis] &gt;gi|629090777|gb|KCW57030.1| hypothetical protein EUGRSUZ_I02694 [Eucalyptus grandis]	gi|359485991|ref|XM_002266693.2|/0.0/PREDICTED: Vitis vinifera dynamin-like protein ARC5 (LOC100253726), mRNA	sp|Q84N64|ARC5_ARATH/0.0/Dynamin-like protein ARC5 OS=Arabidopsis thaliana GN=ARC5 PE=1 SV=2	osa:4327743/4e-15/Os01g0920400; K01528 dynamin GTPase [EC:3.6.5.5]	YOR211c/2e-11/---	SM00053/1.2E-5/Dynamin, GTPase	-
PAU018814.3	scaffold401	-	RetainedIntron	77386-78706	gi|702468760|ref|XP_010030071.1|/0/PREDICTED: dynamin-like protein ARC5 [Eucalyptus grandis] &gt;gi|629090776|gb|KCW57029.1| hypothetical protein EUGRSUZ_I02694 [Eucalyptus grandis] &gt;gi|629090777|gb|KCW57030.1| hypothetical protein EUGRSUZ_I02694 [Eucalyptus grandis]	gi|359485991|ref|XM_002266693.2|/0.0/PREDICTED: Vitis vinifera dynamin-like protein ARC5 (LOC100253726), mRNA	sp|Q84N64|ARC5_ARATH/0.0/Dynamin-like protein ARC5 OS=Arabidopsis thaliana GN=ARC5 PE=1 SV=2	osa:4327743/4e-15/Os01g0920400; K01528 dynamin GTPase [EC:3.6.5.5]	YOR211c/2e-11/---	SM00053/1.2E-5/Dynamin, GTPase	-
PAU018814.3	scaffold401	-	RetainedIntron	78830-78910	gi|702468760|ref|XP_010030071.1|/0/PREDICTED: dynamin-like protein ARC5 [Eucalyptus grandis] &gt;gi|629090776|gb|KCW57029.1| hypothetical protein EUGRSUZ_I02694 [Eucalyptus grandis] &gt;gi|629090777|gb|KCW57030.1| hypothetical protein EUGRSUZ_I02694 [Eucalyptus grandis]	gi|359485991|ref|XM_002266693.2|/0.0/PREDICTED: Vitis vinifera dynamin-like protein ARC5 (LOC100253726), mRNA	sp|Q84N64|ARC5_ARATH/0.0/Dynamin-like protein ARC5 OS=Arabidopsis thaliana GN=ARC5 PE=1 SV=2	osa:4327743/4e-15/Os01g0920400; K01528 dynamin GTPase [EC:3.6.5.5]	YOR211c/2e-11/---	SM00053/1.2E-5/Dynamin, GTPase	-
PAU018814.3	scaffold401	-	RetainedIntron	79076-79974	gi|702468760|ref|XP_010030071.1|/0/PREDICTED: dynamin-like protein ARC5 [Eucalyptus grandis] &gt;gi|629090776|gb|KCW57029.1| hypothetical protein EUGRSUZ_I02694 [Eucalyptus grandis] &gt;gi|629090777|gb|KCW57030.1| hypothetical protein EUGRSUZ_I02694 [Eucalyptus grandis]	gi|359485991|ref|XM_002266693.2|/0.0/PREDICTED: Vitis vinifera dynamin-like protein ARC5 (LOC100253726), mRNA	sp|Q84N64|ARC5_ARATH/0.0/Dynamin-like protein ARC5 OS=Arabidopsis thaliana GN=ARC5 PE=1 SV=2	osa:4327743/4e-15/Os01g0920400; K01528 dynamin GTPase [EC:3.6.5.5]	YOR211c/2e-11/---	SM00053/1.2E-5/Dynamin, GTPase	-
PAU018814.3	scaffold401	-	SkippedExon	73452-73500	75638-75701	75941-76033	gi|702468760|ref|XP_010030071.1|/0/PREDICTED: dynamin-like protein ARC5 [Eucalyptus grandis] &gt;gi|629090776|gb|KCW57029.1| hypothetical protein EUGRSUZ_I02694 [Eucalyptus grandis] &gt;gi|629090777|gb|KCW57030.1| hypothetical protein EUGRSUZ_I02694 [Eucalyptus grandis]	gi|359485991|ref|XM_002266693.2|/0.0/PREDICTED: Vitis vinifera dynamin-like protein ARC5 (LOC100253726), mRNA	sp|Q84N64|ARC5_ARATH/0.0/Dynamin-like protein ARC5 OS=Arabidopsis thaliana GN=ARC5 PE=1 SV=2	osa:4327743/4e-15/Os01g0920400; K01528 dynamin GTPase [EC:3.6.5.5]	YOR211c/2e-11/---	SM00053/1.2E-5/Dynamin, GTPase	-
PAU018814.3	scaffold401	-	SkippedExon	75638-75701	75941-76033	76131-76264	gi|702468760|ref|XP_010030071.1|/0/PREDICTED: dynamin-like protein ARC5 [Eucalyptus grandis] &gt;gi|629090776|gb|KCW57029.1| hypothetical protein EUGRSUZ_I02694 [Eucalyptus grandis] &gt;gi|629090777|gb|KCW57030.1| hypothetical protein EUGRSUZ_I02694 [Eucalyptus grandis]	gi|359485991|ref|XM_002266693.2|/0.0/PREDICTED: Vitis vinifera dynamin-like protein ARC5 (LOC100253726), mRNA	sp|Q84N64|ARC5_ARATH/0.0/Dynamin-like protein ARC5 OS=Arabidopsis thaliana GN=ARC5 PE=1 SV=2	osa:4327743/4e-15/Os01g0920400; K01528 dynamin GTPase [EC:3.6.5.5]	YOR211c/2e-11/---	SM00053/1.2E-5/Dynamin, GTPase	-
PAU018814.3	scaffold401	-	A3SS	75941-76033	75638-75701	75638-75815	gi|702468760|ref|XP_010030071.1|/0/PREDICTED: dynamin-like protein ARC5 [Eucalyptus grandis] &gt;gi|629090776|gb|KCW57029.1| hypothetical protein EUGRSUZ_I02694 [Eucalyptus grandis] &gt;gi|629090777|gb|KCW57030.1| hypothetical protein EUGRSUZ_I02694 [Eucalyptus grandis]	gi|359485991|ref|XM_002266693.2|/0.0/PREDICTED: Vitis vinifera dynamin-like protein ARC5 (LOC100253726), mRNA	sp|Q84N64|ARC5_ARATH/0.0/Dynamin-like protein ARC5 OS=Arabidopsis thaliana GN=ARC5 PE=1 SV=2	osa:4327743/4e-15/Os01g0920400; K01528 dynamin GTPase [EC:3.6.5.5]	YOR211c/2e-11/---	SM00053/1.2E-5/Dynamin, GTPase	-
PAU018814.3	scaffold401	-	A3SS	77164-77385	76131-76264	76131-76436	gi|702468760|ref|XP_010030071.1|/0/PREDICTED: dynamin-like protein ARC5 [Eucalyptus grandis] &gt;gi|629090776|gb|KCW57029.1| hypothetical protein EUGRSUZ_I02694 [Eucalyptus grandis] &gt;gi|629090777|gb|KCW57030.1| hypothetical protein EUGRSUZ_I02694 [Eucalyptus grandis]	gi|359485991|ref|XM_002266693.2|/0.0/PREDICTED: Vitis vinifera dynamin-like protein ARC5 (LOC100253726), mRNA	sp|Q84N64|ARC5_ARATH/0.0/Dynamin-like protein ARC5 OS=Arabidopsis thaliana GN=ARC5 PE=1 SV=2	osa:4327743/4e-15/Os01g0920400; K01528 dynamin GTPase [EC:3.6.5.5]	YOR211c/2e-11/---	SM00053/1.2E-5/Dynamin, GTPase	-
PAU018814.3	scaffold401	-	A3SS	78911-79075	78707-78829	78707-78822	gi|702468760|ref|XP_010030071.1|/0/PREDICTED: dynamin-like protein ARC5 [Eucalyptus grandis] &gt;gi|629090776|gb|KCW57029.1| hypothetical protein EUGRSUZ_I02694 [Eucalyptus grandis] &gt;gi|629090777|gb|KCW57030.1| hypothetical protein EUGRSUZ_I02694 [Eucalyptus grandis]	gi|359485991|ref|XM_002266693.2|/0.0/PREDICTED: Vitis vinifera dynamin-like protein ARC5 (LOC100253726), mRNA	sp|Q84N64|ARC5_ARATH/0.0/Dynamin-like protein ARC5 OS=Arabidopsis thaliana GN=ARC5 PE=1 SV=2	osa:4327743/4e-15/Os01g0920400; K01528 dynamin GTPase [EC:3.6.5.5]	YOR211c/2e-11/---	SM00053/1.2E-5/Dynamin, GTPase	-
PAU018814.3	scaffold401	-	A5SS	68438-68779	69424-69481	69420-69481	gi|702468760|ref|XP_010030071.1|/0/PREDICTED: dynamin-like protein ARC5 [Eucalyptus grandis] &gt;gi|629090776|gb|KCW57029.1| hypothetical protein EUGRSUZ_I02694 [Eucalyptus grandis] &gt;gi|629090777|gb|KCW57030.1| hypothetical protein EUGRSUZ_I02694 [Eucalyptus grandis]	gi|359485991|ref|XM_002266693.2|/0.0/PREDICTED: Vitis vinifera dynamin-like protein ARC5 (LOC100253726), mRNA	sp|Q84N64|ARC5_ARATH/0.0/Dynamin-like protein ARC5 OS=Arabidopsis thaliana GN=ARC5 PE=1 SV=2	osa:4327743/4e-15/Os01g0920400; K01528 dynamin GTPase [EC:3.6.5.5]	YOR211c/2e-11/---	SM00053/1.2E-5/Dynamin, GTPase	-
PAU018814.3	scaffold401	-	A5SS	76131-76264	77164-77385	76348-77385	gi|702468760|ref|XP_010030071.1|/0/PREDICTED: dynamin-like protein ARC5 [Eucalyptus grandis] &gt;gi|629090776|gb|KCW57029.1| hypothetical protein EUGRSUZ_I02694 [Eucalyptus grandis] &gt;gi|629090777|gb|KCW57030.1| hypothetical protein EUGRSUZ_I02694 [Eucalyptus grandis]	gi|359485991|ref|XM_002266693.2|/0.0/PREDICTED: Vitis vinifera dynamin-like protein ARC5 (LOC100253726), mRNA	sp|Q84N64|ARC5_ARATH/0.0/Dynamin-like protein ARC5 OS=Arabidopsis thaliana GN=ARC5 PE=1 SV=2	osa:4327743/4e-15/Os01g0920400; K01528 dynamin GTPase [EC:3.6.5.5]	YOR211c/2e-11/---	SM00053/1.2E-5/Dynamin, GTPase	-
PAU018838.1	scaffold401	+	A3SS	256151-256474	259233-259357	259228-259357	gi|604298446|gb|EYU18490.1|/0/hypothetical protein MIMGU_mgv1a006994mg [Erythranthe guttata]	gi|225319083|dbj|AK329661.1|/1e-50/Solanum lycopersicum cDNA, clone: LEFL3149M03, HTC in root	NA	vvi:100245053/2e-173/protein trpH-like; K07053	BH2283/2e-39/---	PTHR30007:SF4/1.9E-70/--	-
PAU018838.1	scaffold401	+	RetainedIntron	256475-259232	gi|604298446|gb|EYU18490.1|/0/hypothetical protein MIMGU_mgv1a006994mg [Erythranthe guttata]	gi|225319083|dbj|AK329661.1|/1e-50/Solanum lycopersicum cDNA, clone: LEFL3149M03, HTC in root	-	vvi:100245053/2e-173/protein trpH-like; K07053	BH2283/2e-39/---	PTHR30007:SF4/1.9E-70/--	-
PAU018838.1	scaffold401	+	RetainedIntron	259358-259675	gi|604298446|gb|EYU18490.1|/0/hypothetical protein MIMGU_mgv1a006994mg [Erythranthe guttata]	gi|225319083|dbj|AK329661.1|/1e-50/Solanum lycopersicum cDNA, clone: LEFL3149M03, HTC in root	-	vvi:100245053/2e-173/protein trpH-like; K07053	BH2283/2e-39/---	PTHR30007:SF4/1.9E-70/--	-
PAU018838.1	scaffold401	+	RetainedIntron	260261-260832	gi|604298446|gb|EYU18490.1|/0/hypothetical protein MIMGU_mgv1a006994mg [Erythranthe guttata]	gi|225319083|dbj|AK329661.1|/1e-50/Solanum lycopersicum cDNA, clone: LEFL3149M03, HTC in root	-	vvi:100245053/2e-173/protein trpH-like; K07053	BH2283/2e-39/---	PTHR30007:SF4/1.9E-70/--	-
PAU019329.1	scaffold410	-	RetainedIntron	231601-231710	gi|604328597|gb|EYU34148.1|/0/hypothetical protein MIMGU_mgv1a000301mg [Erythranthe guttata]	gi|359474548|ref|XM_002277511.2|/1e-153/PREDICTED: Vitis vinifera P-glycoprotein-like (LOC100248951), mRNA	sp|Q8LPK2|AB2B_ARATH/0.0/ABC transporter B family member 2 OS=Arabidopsis thaliana GN=ABCB2 PE=1 SV=3	vvi:100248951/0.0/P-glycoprotein-like; K05658 ATP-binding cassette, subfamily B (MDR/TAP), member 1	SPCC663.03/2e-98/---	PS50893/25.35/ATP-binding cassette, ABC transporter-type domain profile.	-
PAU019329.1	scaffold410	-	RetainedIntron	232704-232783	gi|604328597|gb|EYU34148.1|/0/hypothetical protein MIMGU_mgv1a000301mg [Erythranthe guttata]	gi|359474548|ref|XM_002277511.2|/1e-153/PREDICTED: Vitis vinifera P-glycoprotein-like (LOC100248951), mRNA	sp|Q8LPK2|AB2B_ARATH/0.0/ABC transporter B family member 2 OS=Arabidopsis thaliana GN=ABCB2 PE=1 SV=3	vvi:100248951/0.0/P-glycoprotein-like; K05658 ATP-binding cassette, subfamily B (MDR/TAP), member 1	SPCC663.03/2e-98/---	PS50893/25.35/ATP-binding cassette, ABC transporter-type domain profile.	-
PAU019329.1	scaffold410	-	RetainedIntron	232118-232455	gi|604328597|gb|EYU34148.1|/0/hypothetical protein MIMGU_mgv1a000301mg [Erythranthe guttata]	gi|359474548|ref|XM_002277511.2|/1e-153/PREDICTED: Vitis vinifera P-glycoprotein-like (LOC100248951), mRNA	sp|Q8LPK2|AB2B_ARATH/0.0/ABC transporter B family member 2 OS=Arabidopsis thaliana GN=ABCB2 PE=1 SV=3	vvi:100248951/0.0/P-glycoprotein-like; K05658 ATP-binding cassette, subfamily B (MDR/TAP), member 1	SPCC663.03/2e-98/---	PS50893/25.35/ATP-binding cassette, ABC transporter-type domain profile.	-
PAU019329.1	scaffold410	-	RetainedIntron	233026-233200	gi|604328597|gb|EYU34148.1|/0/hypothetical protein MIMGU_mgv1a000301mg [Erythranthe guttata]	gi|359474548|ref|XM_002277511.2|/1e-153/PREDICTED: Vitis vinifera P-glycoprotein-like (LOC100248951), mRNA	sp|Q8LPK2|AB2B_ARATH/0.0/ABC transporter B family member 2 OS=Arabidopsis thaliana GN=ABCB2 PE=1 SV=3	vvi:100248951/0.0/P-glycoprotein-like; K05658 ATP-binding cassette, subfamily B (MDR/TAP), member 1	SPCC663.03/2e-98/---	PS50893/25.35/ATP-binding cassette, ABC transporter-type domain profile.	-
PAU019826.1	scaffold420	-	RetainedIntron	315793-315865	gi|604319963|gb|EYU31127.1|/0/hypothetical protein MIMGU_mgv1a000549mg [Erythranthe guttata]	gi|470106070|ref|XM_004289351.1|/0.0/PREDICTED: Fragaria vesca subsp. vesca cellulose synthase A catalytic subunit 6 [UDP-forming]-like (LOC101311917), mRNA	sp|O48947|CESA2_ARATH/0.0/Cellulose synthase A catalytic subunit 2 [UDP-forming] OS=Arabidopsis thaliana GN=CESA2 PE=1 SV=1	pop:POPTR_819877/0.0/cellulose synthase A (EC:2.4.1.12); K10999 cellulose synthase A [EC:2.4.1.12]	alr3757/2e-13/---	PTHR13301:SF30/0.0/--	-
PAU019826.1	scaffold420	-	RetainedIntron	316063-316205	gi|604319963|gb|EYU31127.1|/0/hypothetical protein MIMGU_mgv1a000549mg [Erythranthe guttata]	gi|470106070|ref|XM_004289351.1|/0.0/PREDICTED: Fragaria vesca subsp. vesca cellulose synthase A catalytic subunit 6 [UDP-forming]-like (LOC101311917), mRNA	sp|O48947|CESA2_ARATH/0.0/Cellulose synthase A catalytic subunit 2 [UDP-forming] OS=Arabidopsis thaliana GN=CESA2 PE=1 SV=1	pop:POPTR_819877/0.0/cellulose synthase A (EC:2.4.1.12); K10999 cellulose synthase A [EC:2.4.1.12]	alr3757/2e-13/---	PTHR13301:SF30/0.0/--	-
PAU019826.1	scaffold420	-	RetainedIntron	317024-317689	gi|604319963|gb|EYU31127.1|/0/hypothetical protein MIMGU_mgv1a000549mg [Erythranthe guttata]	gi|470106070|ref|XM_004289351.1|/0.0/PREDICTED: Fragaria vesca subsp. vesca cellulose synthase A catalytic subunit 6 [UDP-forming]-like (LOC101311917), mRNA	sp|O48947|CESA2_ARATH/0.0/Cellulose synthase A catalytic subunit 2 [UDP-forming] OS=Arabidopsis thaliana GN=CESA2 PE=1 SV=1	pop:POPTR_819877/0.0/cellulose synthase A (EC:2.4.1.12); K10999 cellulose synthase A [EC:2.4.1.12]	alr3757/2e-13/---	PTHR13301:SF30/0.0/--	-
PAU019826.1	scaffold420	-	RetainedIntron	317828-318001	gi|604319963|gb|EYU31127.1|/0/hypothetical protein MIMGU_mgv1a000549mg [Erythranthe guttata]	gi|470106070|ref|XM_004289351.1|/0.0/PREDICTED: Fragaria vesca subsp. vesca cellulose synthase A catalytic subunit 6 [UDP-forming]-like (LOC101311917), mRNA	sp|O48947|CESA2_ARATH/0.0/Cellulose synthase A catalytic subunit 2 [UDP-forming] OS=Arabidopsis thaliana GN=CESA2 PE=1 SV=1	pop:POPTR_819877/0.0/cellulose synthase A (EC:2.4.1.12); K10999 cellulose synthase A [EC:2.4.1.12]	alr3757/2e-13/---	PTHR13301:SF30/0.0/--	-
PAU019826.1	scaffold420	-	RetainedIntron	318348-318684	gi|604319963|gb|EYU31127.1|/0/hypothetical protein MIMGU_mgv1a000549mg [Erythranthe guttata]	gi|470106070|ref|XM_004289351.1|/0.0/PREDICTED: Fragaria vesca subsp. vesca cellulose synthase A catalytic subunit 6 [UDP-forming]-like (LOC101311917), mRNA	sp|O48947|CESA2_ARATH/0.0/Cellulose synthase A catalytic subunit 2 [UDP-forming] OS=Arabidopsis thaliana GN=CESA2 PE=1 SV=1	pop:POPTR_819877/0.0/cellulose synthase A (EC:2.4.1.12); K10999 cellulose synthase A [EC:2.4.1.12]	alr3757/2e-13/---	PTHR13301:SF30/0.0/--	-
PAU019826.1	scaffold420	-	RetainedIntron	319515-319603	gi|604319963|gb|EYU31127.1|/0/hypothetical protein MIMGU_mgv1a000549mg [Erythranthe guttata]	gi|470106070|ref|XM_004289351.1|/0.0/PREDICTED: Fragaria vesca subsp. vesca cellulose synthase A catalytic subunit 6 [UDP-forming]-like (LOC101311917), mRNA	sp|O48947|CESA2_ARATH/0.0/Cellulose synthase A catalytic subunit 2 [UDP-forming] OS=Arabidopsis thaliana GN=CESA2 PE=1 SV=1	pop:POPTR_819877/0.0/cellulose synthase A (EC:2.4.1.12); K10999 cellulose synthase A [EC:2.4.1.12]	alr3757/2e-13/---	PTHR13301:SF30/0.0/--	-
PAU019826.1	scaffold420	-	RetainedIntron	319704-319821	gi|604319963|gb|EYU31127.1|/0/hypothetical protein MIMGU_mgv1a000549mg [Erythranthe guttata]	gi|470106070|ref|XM_004289351.1|/0.0/PREDICTED: Fragaria vesca subsp. vesca cellulose synthase A catalytic subunit 6 [UDP-forming]-like (LOC101311917), mRNA	sp|O48947|CESA2_ARATH/0.0/Cellulose synthase A catalytic subunit 2 [UDP-forming] OS=Arabidopsis thaliana GN=CESA2 PE=1 SV=1	pop:POPTR_819877/0.0/cellulose synthase A (EC:2.4.1.12); K10999 cellulose synthase A [EC:2.4.1.12]	alr3757/2e-13/---	PTHR13301:SF30/0.0/--	-
PAU019826.1	scaffold420	-	RetainedIntron	320034-320136	gi|604319963|gb|EYU31127.1|/0/hypothetical protein MIMGU_mgv1a000549mg [Erythranthe guttata]	gi|470106070|ref|XM_004289351.1|/0.0/PREDICTED: Fragaria vesca subsp. vesca cellulose synthase A catalytic subunit 6 [UDP-forming]-like (LOC101311917), mRNA	sp|O48947|CESA2_ARATH/0.0/Cellulose synthase A catalytic subunit 2 [UDP-forming] OS=Arabidopsis thaliana GN=CESA2 PE=1 SV=1	pop:POPTR_819877/0.0/cellulose synthase A (EC:2.4.1.12); K10999 cellulose synthase A [EC:2.4.1.12]	alr3757/2e-13/---	PTHR13301:SF30/0.0/--	-
PAU019826.1	scaffold420	-	RetainedIntron	320333-320993	gi|604319963|gb|EYU31127.1|/0/hypothetical protein MIMGU_mgv1a000549mg [Erythranthe guttata]	gi|470106070|ref|XM_004289351.1|/0.0/PREDICTED: Fragaria vesca subsp. vesca cellulose synthase A catalytic subunit 6 [UDP-forming]-like (LOC101311917), mRNA	sp|O48947|CESA2_ARATH/0.0/Cellulose synthase A catalytic subunit 2 [UDP-forming] OS=Arabidopsis thaliana GN=CESA2 PE=1 SV=1	pop:POPTR_819877/0.0/cellulose synthase A (EC:2.4.1.12); K10999 cellulose synthase A [EC:2.4.1.12]	alr3757/2e-13/---	PTHR13301:SF30/0.0/--	-
PAU019826.1	scaffold420	-	A3SS	317690-317827	316898-317023	316898-317033	gi|604319963|gb|EYU31127.1|/0/hypothetical protein MIMGU_mgv1a000549mg [Erythranthe guttata]	gi|470106070|ref|XM_004289351.1|/0.0/PREDICTED: Fragaria vesca subsp. vesca cellulose synthase A catalytic subunit 6 [UDP-forming]-like (LOC101311917), mRNA	sp|O48947|CESA2_ARATH/0.0/Cellulose synthase A catalytic subunit 2 [UDP-forming] OS=Arabidopsis thaliana GN=CESA2 PE=1 SV=1	pop:POPTR_819877/0.0/cellulose synthase A (EC:2.4.1.12); K10999 cellulose synthase A [EC:2.4.1.12]	alr3757/2e-13/---	PTHR13301:SF30/0.0/--	-
PAU019826.1	scaffold420	-	A5SS	317690-317827	318002-318347	317903-318347	gi|604319963|gb|EYU31127.1|/0/hypothetical protein MIMGU_mgv1a000549mg [Erythranthe guttata]	gi|470106070|ref|XM_004289351.1|/0.0/PREDICTED: Fragaria vesca subsp. vesca cellulose synthase A catalytic subunit 6 [UDP-forming]-like (LOC101311917), mRNA	sp|O48947|CESA2_ARATH/0.0/Cellulose synthase A catalytic subunit 2 [UDP-forming] OS=Arabidopsis thaliana GN=CESA2 PE=1 SV=1	pop:POPTR_819877/0.0/cellulose synthase A (EC:2.4.1.12); K10999 cellulose synthase A [EC:2.4.1.12]	alr3757/2e-13/---	PTHR13301:SF30/0.0/--	-
PAU019826.1	scaffold420	-	RetainedIntron	316775-316897	gi|604319963|gb|EYU31127.1|/0/hypothetical protein MIMGU_mgv1a000549mg [Erythranthe guttata]	gi|470106070|ref|XM_004289351.1|/0.0/PREDICTED: Fragaria vesca subsp. vesca cellulose synthase A catalytic subunit 6 [UDP-forming]-like (LOC101311917), mRNA	sp|O48947|CESA2_ARATH/0.0/Cellulose synthase A catalytic subunit 2 [UDP-forming] OS=Arabidopsis thaliana GN=CESA2 PE=1 SV=1	pop:POPTR_819877/0.0/cellulose synthase A (EC:2.4.1.12); K10999 cellulose synthase A [EC:2.4.1.12]	alr3757/2e-13/---	PTHR13301:SF30/0.0/--	-
PAU020586.1	scaffold449	-	A3SS	111991-112176	110485-111833	110485-111825	gi|719962169|ref|XP_010265637.1|/0/PREDICTED: uncharacterized protein LOC104603303 [Nelumbo nucifera] &gt;gi|719962172|ref|XP_010265710.1| PREDICTED: uncharacterized protein LOC104603303 [Nelumbo nucifera]	gi|345091108|gb|AC155282.2|/4e-52/Medicago truncatula strain A17 clone mth2-63e12, complete sequence	-	-	-	PTHR31448/6.4E-126/--	-
PAU020586.1	scaffold449	-	RetainedIntron	111834-111990	gi|719962169|ref|XP_010265637.1|/0/PREDICTED: uncharacterized protein LOC104603303 [Nelumbo nucifera] &gt;gi|719962172|ref|XP_010265710.1| PREDICTED: uncharacterized protein LOC104603303 [Nelumbo nucifera]	gi|345091108|gb|AC155282.2|/4e-52/Medicago truncatula strain A17 clone mth2-63e12, complete sequence	-	-	-	PTHR31448/6.4E-126/--	-
PAU020715.1	scaffold451	-	A3SS	386019-386341	383258-383405	383258-385824	gi|661886511|emb|CDP09875.1|/8.34707e-156/unnamed protein product [Coffea canephora]	gi|225315057|dbj|AK328207.1|/2e-91/Solanum lycopersicum cDNA, clone: LEFL2049I19, HTC in fruit	sp|Q8L7W5|SMO11_ARATH/7e-134/Methylsterol monooxygenase 1-1 OS=Arabidopsis thaliana GN=SMO1-1 PE=1 SV=1	ath:AT4G12110/2e-133/SMO1-1; sterol-4alpha-methyl oxidase 1-1; K14423 4,4-dimethyl-9beta,19-cyclopropylsterol-4alpha-methyl oxidase [EC:1.14.13.72]	YGR060w/3e-40/---	PTHR11863:SF22/1.5E-132/--	-
PAU020715.1	scaffold451	-	RetainedIntron	382744-383128	gi|661886511|emb|CDP09875.1|/8.34707e-156/unnamed protein product [Coffea canephora]	gi|225315057|dbj|AK328207.1|/2e-91/Solanum lycopersicum cDNA, clone: LEFL2049I19, HTC in fruit	sp|Q8L7W5|SMO11_ARATH/7e-134/Methylsterol monooxygenase 1-1 OS=Arabidopsis thaliana GN=SMO1-1 PE=1 SV=1	ath:AT4G12110/2e-133/SMO1-1; sterol-4alpha-methyl oxidase 1-1; K14423 4,4-dimethyl-9beta,19-cyclopropylsterol-4alpha-methyl oxidase [EC:1.14.13.72]	YGR060w/3e-40/---	PTHR11863:SF22/1.5E-132/--	-
PAU020715.1	scaffold451	-	RetainedIntron	383406-386018	gi|661886511|emb|CDP09875.1|/8.34707e-156/unnamed protein product [Coffea canephora]	gi|225315057|dbj|AK328207.1|/2e-91/Solanum lycopersicum cDNA, clone: LEFL2049I19, HTC in fruit	sp|Q8L7W5|SMO11_ARATH/7e-134/Methylsterol monooxygenase 1-1 OS=Arabidopsis thaliana GN=SMO1-1 PE=1 SV=1	ath:AT4G12110/2e-133/SMO1-1; sterol-4alpha-methyl oxidase 1-1; K14423 4,4-dimethyl-9beta,19-cyclopropylsterol-4alpha-methyl oxidase [EC:1.14.13.72]	YGR060w/3e-40/---	PTHR11863:SF22/1.5E-132/--	-
PAU020715.1	scaffold451	-	A5SS	386019-386341	386577-386906	386472-386906	gi|661886511|emb|CDP09875.1|/8.34707e-156/unnamed protein product [Coffea canephora]	gi|225315057|dbj|AK328207.1|/2e-91/Solanum lycopersicum cDNA, clone: LEFL2049I19, HTC in fruit	sp|Q8L7W5|SMO11_ARATH/7e-134/Methylsterol monooxygenase 1-1 OS=Arabidopsis thaliana GN=SMO1-1 PE=1 SV=1	ath:AT4G12110/2e-133/SMO1-1; sterol-4alpha-methyl oxidase 1-1; K14423 4,4-dimethyl-9beta,19-cyclopropylsterol-4alpha-methyl oxidase [EC:1.14.13.72]	YGR060w/3e-40/---	PTHR11863:SF22/1.5E-132/--	-
PAU021405.1	scaffold476	+	A3SS	224369-224501	225405-225667	225417-225667	gi|604301616|gb|EYU21202.1|/4.57112e-56/hypothetical protein MIMGU_mgv1a016194mg [Erythranthe guttata] &gt;gi|604301617|gb|EYU21203.1| hypothetical protein MIMGU_mgv1a016194mg [Erythranthe guttata] &gt;gi|604301618|gb|EYU21204.1| hypothetical protein MIMGU_mgv1a016194mg [Erythranthe guttata]	gi|124222307|dbj|AK224901.2|/2e-27/Solanum lycopersicum cDNA, clone: FC26AA12, HTC in fruit	-	gmx:100817055/7e-45/protein FAM32A-like; K13120 protein FAM32A	-	PF08555/1.3E-15/Eukaryotic family of unknown function (DUF1754)	-
PAU021405.1	scaffold476	+	RetainedIntron	224502-225404	gi|604301616|gb|EYU21202.1|/4.57112e-56/hypothetical protein MIMGU_mgv1a016194mg [Erythranthe guttata] &gt;gi|604301617|gb|EYU21203.1| hypothetical protein MIMGU_mgv1a016194mg [Erythranthe guttata] &gt;gi|604301618|gb|EYU21204.1| hypothetical protein MIMGU_mgv1a016194mg [Erythranthe guttata]	gi|124222307|dbj|AK224901.2|/2e-27/Solanum lycopersicum cDNA, clone: FC26AA12, HTC in fruit	-	gmx:100817055/7e-45/protein FAM32A-like; K13120 protein FAM32A	-	PF08555/1.3E-15/Eukaryotic family of unknown function (DUF1754)	-
PAU022481.1	scaffold51	-	A3SS	340786-340962	340427-340615	340427-340658	gi|14548095|sp|Q9FYV1.1|INO1_SESIN/0/RecName: Full=Inositol-3-phosphate synthase; Short=MIP synthase; AltName: Full=Myo-inositol 1-phosphate synthase; Short=IPS; Short=MI-1-P synthase [Sesamum indicum] &gt;gi|9858816|gb|AAG01148.1| myo-inositol 1-phosphate synthase [Sesamum indicum]	gi|13447456|gb|AY028259.1|/0.0/Avicennia marina myo-inositol 1-phosphate synthase mRNA, complete cds	sp|Q9FYV1|INO1_SESIN/0.0/Inositol-3-phosphate synthase OS=Sesamum indicum PE=2 SV=1	pop:POPTR_831371/0.0/inositol-3-phosphate synthase (EC:5.5.1.4); K01858 myo-inositol-1-phosphate synthase [EC:5.5.1.4]	YJL153c/2e-151/---	PF07994/2.8E-118/Myo-inositol-1-phosphate synthase	biological_process:GO:0006021//inositol biosynthetic process;GO:0008654//phospholipid biosynthetic process;molecular_function:GO:0000166//nucleotide binding;GO:0004512//inositol-3-phosphate synthase activity;
PAU022481.1	scaffold51	-	A3SS	342048-342183	341695-341942	341695-341871	gi|14548095|sp|Q9FYV1.1|INO1_SESIN/0/RecName: Full=Inositol-3-phosphate synthase; Short=MIP synthase; AltName: Full=Myo-inositol 1-phosphate synthase; Short=IPS; Short=MI-1-P synthase [Sesamum indicum] &gt;gi|9858816|gb|AAG01148.1| myo-inositol 1-phosphate synthase [Sesamum indicum]	gi|13447456|gb|AY028259.1|/0.0/Avicennia marina myo-inositol 1-phosphate synthase mRNA, complete cds	sp|Q9FYV1|INO1_SESIN/0.0/Inositol-3-phosphate synthase OS=Sesamum indicum PE=2 SV=1	pop:POPTR_831371/0.0/inositol-3-phosphate synthase (EC:5.5.1.4); K01858 myo-inositol-1-phosphate synthase [EC:5.5.1.4]	YJL153c/2e-151/---	PF07994/2.8E-118/Myo-inositol-1-phosphate synthase	biological_process:GO:0006021//inositol biosynthetic process;GO:0008654//phospholipid biosynthetic process;molecular_function:GO:0000166//nucleotide binding;GO:0004512//inositol-3-phosphate synthase activity;
PAU022481.1	scaffold51	-	A5SS	341279-341505	341695-341942	341659-341942	gi|14548095|sp|Q9FYV1.1|INO1_SESIN/0/RecName: Full=Inositol-3-phosphate synthase; Short=MIP synthase; AltName: Full=Myo-inositol 1-phosphate synthase; Short=IPS; Short=MI-1-P synthase [Sesamum indicum] &gt;gi|9858816|gb|AAG01148.1| myo-inositol 1-phosphate synthase [Sesamum indicum]	gi|13447456|gb|AY028259.1|/0.0/Avicennia marina myo-inositol 1-phosphate synthase mRNA, complete cds	sp|Q9FYV1|INO1_SESIN/0.0/Inositol-3-phosphate synthase OS=Sesamum indicum PE=2 SV=1	pop:POPTR_831371/0.0/inositol-3-phosphate synthase (EC:5.5.1.4); K01858 myo-inositol-1-phosphate synthase [EC:5.5.1.4]	YJL153c/2e-151/---	PF07994/2.8E-118/Myo-inositol-1-phosphate synthase	biological_process:GO:0006021//inositol biosynthetic process;GO:0008654//phospholipid biosynthetic process;molecular_function:GO:0000166//nucleotide binding;GO:0004512//inositol-3-phosphate synthase activity;
PAU022481.1	scaffold51	-	A5SS	341279-341505	341695-341942	341653-341942	gi|14548095|sp|Q9FYV1.1|INO1_SESIN/0/RecName: Full=Inositol-3-phosphate synthase; Short=MIP synthase; AltName: Full=Myo-inositol 1-phosphate synthase; Short=IPS; Short=MI-1-P synthase [Sesamum indicum] &gt;gi|9858816|gb|AAG01148.1| myo-inositol 1-phosphate synthase [Sesamum indicum]	gi|13447456|gb|AY028259.1|/0.0/Avicennia marina myo-inositol 1-phosphate synthase mRNA, complete cds	sp|Q9FYV1|INO1_SESIN/0.0/Inositol-3-phosphate synthase OS=Sesamum indicum PE=2 SV=1	pop:POPTR_831371/0.0/inositol-3-phosphate synthase (EC:5.5.1.4); K01858 myo-inositol-1-phosphate synthase [EC:5.5.1.4]	YJL153c/2e-151/---	PF07994/2.8E-118/Myo-inositol-1-phosphate synthase	biological_process:GO:0006021//inositol biosynthetic process;GO:0008654//phospholipid biosynthetic process;molecular_function:GO:0000166//nucleotide binding;GO:0004512//inositol-3-phosphate synthase activity;
PAU022481.1	scaffold51	-	RetainedIntron	341943-342047	gi|14548095|sp|Q9FYV1.1|INO1_SESIN/0/RecName: Full=Inositol-3-phosphate synthase; Short=MIP synthase; AltName: Full=Myo-inositol 1-phosphate synthase; Short=IPS; Short=MI-1-P synthase [Sesamum indicum] &gt;gi|9858816|gb|AAG01148.1| myo-inositol 1-phosphate synthase [Sesamum indicum]	gi|13447456|gb|AY028259.1|/0.0/Avicennia marina myo-inositol 1-phosphate synthase mRNA, complete cds	sp|Q9FYV1|INO1_SESIN/0.0/Inositol-3-phosphate synthase OS=Sesamum indicum PE=2 SV=1	pop:POPTR_831371/0.0/inositol-3-phosphate synthase (EC:5.5.1.4); K01858 myo-inositol-1-phosphate synthase [EC:5.5.1.4]	YJL153c/2e-151/---	PF07994/2.8E-118/Myo-inositol-1-phosphate synthase	biological_process:GO:0006021//inositol biosynthetic process;GO:0008654//phospholipid biosynthetic process;molecular_function:GO:0000166//nucleotide binding;GO:0004512//inositol-3-phosphate synthase activity;
PAU022481.1	scaffold51	-	RetainedIntron	342184-342454	gi|14548095|sp|Q9FYV1.1|INO1_SESIN/0/RecName: Full=Inositol-3-phosphate synthase; Short=MIP synthase; AltName: Full=Myo-inositol 1-phosphate synthase; Short=IPS; Short=MI-1-P synthase [Sesamum indicum] &gt;gi|9858816|gb|AAG01148.1| myo-inositol 1-phosphate synthase [Sesamum indicum]	gi|13447456|gb|AY028259.1|/0.0/Avicennia marina myo-inositol 1-phosphate synthase mRNA, complete cds	sp|Q9FYV1|INO1_SESIN/0.0/Inositol-3-phosphate synthase OS=Sesamum indicum PE=2 SV=1	pop:POPTR_831371/0.0/inositol-3-phosphate synthase (EC:5.5.1.4); K01858 myo-inositol-1-phosphate synthase [EC:5.5.1.4]	YJL153c/2e-151/---	PF07994/2.8E-118/Myo-inositol-1-phosphate synthase	biological_process:GO:0006021//inositol biosynthetic process;GO:0008654//phospholipid biosynthetic process;molecular_function:GO:0000166//nucleotide binding;GO:0004512//inositol-3-phosphate synthase activity;
PAU022481.1	scaffold51	-	A3SS	340427-340615	340252-340314	340252-340323	gi|14548095|sp|Q9FYV1.1|INO1_SESIN/0/RecName: Full=Inositol-3-phosphate synthase; Short=MIP synthase; AltName: Full=Myo-inositol 1-phosphate synthase; Short=IPS; Short=MI-1-P synthase [Sesamum indicum] &gt;gi|9858816|gb|AAG01148.1| myo-inositol 1-phosphate synthase [Sesamum indicum]	gi|13447456|gb|AY028259.1|/0.0/Avicennia marina myo-inositol 1-phosphate synthase mRNA, complete cds	sp|Q9FYV1|INO1_SESIN/0.0/Inositol-3-phosphate synthase OS=Sesamum indicum PE=2 SV=1	pop:POPTR_831371/0.0/inositol-3-phosphate synthase (EC:5.5.1.4); K01858 myo-inositol-1-phosphate synthase [EC:5.5.1.4]	YJL153c/2e-151/---	PF07994/2.8E-118/Myo-inositol-1-phosphate synthase	biological_process:GO:0006021//inositol biosynthetic process;GO:0008654//phospholipid biosynthetic process;molecular_function:GO:0000166//nucleotide binding;GO:0004512//inositol-3-phosphate synthase activity;
PAU022530.1	scaffold51	-	A3SS	883836-883977	883202-883506	883202-883475	gi|604319935|gb|EYU31099.1|/1.02105e-173/hypothetical protein MIMGU_mgv1a009674mg [Erythranthe guttata]	gi|470104317|ref|XM_004288506.1|/1e-123/PREDICTED: Fragaria vesca subsp. vesca uncharacterized LOC101311321 (LOC101311321), mRNA	sp|Q9C5J9|Y5483_ARATH/1e-153/Uncharacterized GTP-binding protein At5g64813 OS=Arabidopsis thaliana GN=At5g64813 PE=1 SV=1	ath:AT5G64813/3e-153/LIP1; Ras-related small GTP-binding family protein; K07976 Rab family, other	YBR264c/2e-10/---	PF00071/6.9E-18/Ras family	-
PAU022530.1	scaffold51	-	RetainedIntron	882116-883201	gi|604319935|gb|EYU31099.1|/1.02105e-173/hypothetical protein MIMGU_mgv1a009674mg [Erythranthe guttata]	gi|470104317|ref|XM_004288506.1|/1e-123/PREDICTED: Fragaria vesca subsp. vesca uncharacterized LOC101311321 (LOC101311321), mRNA	sp|Q9C5J9|Y5483_ARATH/1e-153/Uncharacterized GTP-binding protein At5g64813 OS=Arabidopsis thaliana GN=At5g64813 PE=1 SV=1	ath:AT5G64813/3e-153/LIP1; Ras-related small GTP-binding family protein; K07976 Rab family, other	YBR264c/2e-10/---	PF00071/6.9E-18/Ras family	-
PAU022530.1	scaffold51	-	RetainedIntron	883507-883835	gi|604319935|gb|EYU31099.1|/1.02105e-173/hypothetical protein MIMGU_mgv1a009674mg [Erythranthe guttata]	gi|470104317|ref|XM_004288506.1|/1e-123/PREDICTED: Fragaria vesca subsp. vesca uncharacterized LOC101311321 (LOC101311321), mRNA	sp|Q9C5J9|Y5483_ARATH/1e-153/Uncharacterized GTP-binding protein At5g64813 OS=Arabidopsis thaliana GN=At5g64813 PE=1 SV=1	ath:AT5G64813/3e-153/LIP1; Ras-related small GTP-binding family protein; K07976 Rab family, other	YBR264c/2e-10/---	PF00071/6.9E-18/Ras family	-
PAU022530.1	scaffold51	-	RetainedIntron	884151-885411	gi|604319935|gb|EYU31099.1|/1.02105e-173/hypothetical protein MIMGU_mgv1a009674mg [Erythranthe guttata]	gi|470104317|ref|XM_004288506.1|/1e-123/PREDICTED: Fragaria vesca subsp. vesca uncharacterized LOC101311321 (LOC101311321), mRNA	sp|Q9C5J9|Y5483_ARATH/1e-153/Uncharacterized GTP-binding protein At5g64813 OS=Arabidopsis thaliana GN=At5g64813 PE=1 SV=1	ath:AT5G64813/3e-153/LIP1; Ras-related small GTP-binding family protein; K07976 Rab family, other	YBR264c/2e-10/---	PF00071/6.9E-18/Ras family	-
PAU022530.1	scaffold51	-	A3SS	883836-883977	883202-883506	883202-883472	gi|604319935|gb|EYU31099.1|/1.02105e-173/hypothetical protein MIMGU_mgv1a009674mg [Erythranthe guttata]	gi|470104317|ref|XM_004288506.1|/1e-123/PREDICTED: Fragaria vesca subsp. vesca uncharacterized LOC101311321 (LOC101311321), mRNA	sp|Q9C5J9|Y5483_ARATH/1e-153/Uncharacterized GTP-binding protein At5g64813 OS=Arabidopsis thaliana GN=At5g64813 PE=1 SV=1	ath:AT5G64813/3e-153/LIP1; Ras-related small GTP-binding family protein; K07976 Rab family, other	YBR264c/2e-10/---	PF00071/6.9E-18/Ras family	-
PAU022530.1	scaffold51	-	A5SS	882062-882115	883202-883506	883198-883506	gi|604319935|gb|EYU31099.1|/1.02105e-173/hypothetical protein MIMGU_mgv1a009674mg [Erythranthe guttata]	gi|470104317|ref|XM_004288506.1|/1e-123/PREDICTED: Fragaria vesca subsp. vesca uncharacterized LOC101311321 (LOC101311321), mRNA	sp|Q9C5J9|Y5483_ARATH/1e-153/Uncharacterized GTP-binding protein At5g64813 OS=Arabidopsis thaliana GN=At5g64813 PE=1 SV=1	ath:AT5G64813/3e-153/LIP1; Ras-related small GTP-binding family protein; K07976 Rab family, other	YBR264c/2e-10/---	PF00071/6.9E-18/Ras family	-
PAU022530.1	scaffold51	-	RetainedIntron	883978-884058	gi|604319935|gb|EYU31099.1|/1.02105e-173/hypothetical protein MIMGU_mgv1a009674mg [Erythranthe guttata]	gi|470104317|ref|XM_004288506.1|/1e-123/PREDICTED: Fragaria vesca subsp. vesca uncharacterized LOC101311321 (LOC101311321), mRNA	sp|Q9C5J9|Y5483_ARATH/1e-153/Uncharacterized GTP-binding protein At5g64813 OS=Arabidopsis thaliana GN=At5g64813 PE=1 SV=1	ath:AT5G64813/3e-153/LIP1; Ras-related small GTP-binding family protein; K07976 Rab family, other	YBR264c/2e-10/---	PF00071/6.9E-18/Ras family	-
PAU022538.1	scaffold51	-	A3SS	967558-968205	966928-967321	966928-967212	gi|359480861|ref|XP_002275681.2|/0/PREDICTED: uncharacterized protein LOC100247348 [Vitis vinifera]	gi|359480860|ref|XM_002275645.2|/0.0/PREDICTED: Vitis vinifera uncharacterized LOC100247348 (LOC100247348), mRNA	-	-	-	PTHR13650/0.0/--	-
PAU022538.1	scaffold51	-	RetainedIntron	952290-952473	gi|359480861|ref|XP_002275681.2|/0/PREDICTED: uncharacterized protein LOC100247348 [Vitis vinifera]	gi|359480860|ref|XM_002275645.2|/0.0/PREDICTED: Vitis vinifera uncharacterized LOC100247348 (LOC100247348), mRNA	-	-	-	PTHR13650/0.0/--	-
PAU022538.1	scaffold51	-	RetainedIntron	952816-953154	gi|359480861|ref|XP_002275681.2|/0/PREDICTED: uncharacterized protein LOC100247348 [Vitis vinifera]	gi|359480860|ref|XM_002275645.2|/0.0/PREDICTED: Vitis vinifera uncharacterized LOC100247348 (LOC100247348), mRNA	-	-	-	PTHR13650/0.0/--	-
PAU022538.1	scaffold51	-	RetainedIntron	953338-953632	gi|359480861|ref|XP_002275681.2|/0/PREDICTED: uncharacterized protein LOC100247348 [Vitis vinifera]	gi|359480860|ref|XM_002275645.2|/0.0/PREDICTED: Vitis vinifera uncharacterized LOC100247348 (LOC100247348), mRNA	-	-	-	PTHR13650/0.0/--	-
PAU022538.1	scaffold51	-	RetainedIntron	953888-954270	gi|359480861|ref|XP_002275681.2|/0/PREDICTED: uncharacterized protein LOC100247348 [Vitis vinifera]	gi|359480860|ref|XM_002275645.2|/0.0/PREDICTED: Vitis vinifera uncharacterized LOC100247348 (LOC100247348), mRNA	-	-	-	PTHR13650/0.0/--	-
PAU022538.1	scaffold51	-	RetainedIntron	955001-955103	gi|359480861|ref|XP_002275681.2|/0/PREDICTED: uncharacterized protein LOC100247348 [Vitis vinifera]	gi|359480860|ref|XM_002275645.2|/0.0/PREDICTED: Vitis vinifera uncharacterized LOC100247348 (LOC100247348), mRNA	-	-	-	PTHR13650/0.0/--	-
PAU022538.1	scaffold51	-	RetainedIntron	955226-955522	gi|359480861|ref|XP_002275681.2|/0/PREDICTED: uncharacterized protein LOC100247348 [Vitis vinifera]	gi|359480860|ref|XM_002275645.2|/0.0/PREDICTED: Vitis vinifera uncharacterized LOC100247348 (LOC100247348), mRNA	-	-	-	PTHR13650/0.0/--	-
PAU022538.1	scaffold51	-	RetainedIntron	955640-958089	gi|359480861|ref|XP_002275681.2|/0/PREDICTED: uncharacterized protein LOC100247348 [Vitis vinifera]	gi|359480860|ref|XM_002275645.2|/0.0/PREDICTED: Vitis vinifera uncharacterized LOC100247348 (LOC100247348), mRNA	-	-	-	PTHR13650/0.0/--	-
PAU022538.1	scaffold51	-	RetainedIntron	960262-960366	gi|359480861|ref|XP_002275681.2|/0/PREDICTED: uncharacterized protein LOC100247348 [Vitis vinifera]	gi|359480860|ref|XM_002275645.2|/0.0/PREDICTED: Vitis vinifera uncharacterized LOC100247348 (LOC100247348), mRNA	-	-	-	PTHR13650/0.0/--	-
PAU022538.1	scaffold51	-	RetainedIntron	960427-960526	gi|359480861|ref|XP_002275681.2|/0/PREDICTED: uncharacterized protein LOC100247348 [Vitis vinifera]	gi|359480860|ref|XM_002275645.2|/0.0/PREDICTED: Vitis vinifera uncharacterized LOC100247348 (LOC100247348), mRNA	-	-	-	PTHR13650/0.0/--	-
PAU022538.1	scaffold51	-	RetainedIntron	961082-965790	gi|359480861|ref|XP_002275681.2|/0/PREDICTED: uncharacterized protein LOC100247348 [Vitis vinifera]	gi|359480860|ref|XM_002275645.2|/0.0/PREDICTED: Vitis vinifera uncharacterized LOC100247348 (LOC100247348), mRNA	-	-	-	PTHR13650/0.0/--	-
PAU022538.1	scaffold51	-	RetainedIntron	967322-967557	gi|359480861|ref|XP_002275681.2|/0/PREDICTED: uncharacterized protein LOC100247348 [Vitis vinifera]	gi|359480860|ref|XM_002275645.2|/0.0/PREDICTED: Vitis vinifera uncharacterized LOC100247348 (LOC100247348), mRNA	-	-	-	PTHR13650/0.0/--	-
PAU022538.1	scaffold51	-	RetainedIntron	968206-970786	gi|359480861|ref|XP_002275681.2|/0/PREDICTED: uncharacterized protein LOC100247348 [Vitis vinifera]	gi|359480860|ref|XM_002275645.2|/0.0/PREDICTED: Vitis vinifera uncharacterized LOC100247348 (LOC100247348), mRNA	-	-	-	PTHR13650/0.0/--	-
PAU022538.1	scaffold51	-	RetainedIntron	971078-971173	gi|359480861|ref|XP_002275681.2|/0/PREDICTED: uncharacterized protein LOC100247348 [Vitis vinifera]	gi|359480860|ref|XM_002275645.2|/0.0/PREDICTED: Vitis vinifera uncharacterized LOC100247348 (LOC100247348), mRNA	-	-	-	PTHR13650/0.0/--	-
PAU022538.1	scaffold51	-	RetainedIntron	971360-971434	gi|359480861|ref|XP_002275681.2|/0/PREDICTED: uncharacterized protein LOC100247348 [Vitis vinifera]	gi|359480860|ref|XM_002275645.2|/0.0/PREDICTED: Vitis vinifera uncharacterized LOC100247348 (LOC100247348), mRNA	-	-	-	PTHR13650/0.0/--	-
PAU022538.1	scaffold51	-	RetainedIntron	971924-972001	gi|359480861|ref|XP_002275681.2|/0/PREDICTED: uncharacterized protein LOC100247348 [Vitis vinifera]	gi|359480860|ref|XM_002275645.2|/0.0/PREDICTED: Vitis vinifera uncharacterized LOC100247348 (LOC100247348), mRNA	-	-	-	PTHR13650/0.0/--	-
PAU022538.1	scaffold51	-	RetainedIntron	972258-973842	gi|359480861|ref|XP_002275681.2|/0/PREDICTED: uncharacterized protein LOC100247348 [Vitis vinifera]	gi|359480860|ref|XM_002275645.2|/0.0/PREDICTED: Vitis vinifera uncharacterized LOC100247348 (LOC100247348), mRNA	-	-	-	PTHR13650/0.0/--	-
PAU022538.1	scaffold51	-	RetainedIntron	973966-974141	gi|359480861|ref|XP_002275681.2|/0/PREDICTED: uncharacterized protein LOC100247348 [Vitis vinifera]	gi|359480860|ref|XM_002275645.2|/0.0/PREDICTED: Vitis vinifera uncharacterized LOC100247348 (LOC100247348), mRNA	-	-	-	PTHR13650/0.0/--	-
PAU022538.1	scaffold51	-	RetainedIntron	974218-975215	gi|359480861|ref|XP_002275681.2|/0/PREDICTED: uncharacterized protein LOC100247348 [Vitis vinifera]	gi|359480860|ref|XM_002275645.2|/0.0/PREDICTED: Vitis vinifera uncharacterized LOC100247348 (LOC100247348), mRNA	-	-	-	PTHR13650/0.0/--	-
PAU022538.1	scaffold51	-	RetainedIntron	977391-977481	gi|359480861|ref|XP_002275681.2|/0/PREDICTED: uncharacterized protein LOC100247348 [Vitis vinifera]	gi|359480860|ref|XM_002275645.2|/0.0/PREDICTED: Vitis vinifera uncharacterized LOC100247348 (LOC100247348), mRNA	-	-	-	PTHR13650/0.0/--	-
PAU022538.1	scaffold51	-	A3SS	953155-953337	952474-952815	952474-952670	gi|359480861|ref|XP_002275681.2|/0/PREDICTED: uncharacterized protein LOC100247348 [Vitis vinifera]	gi|359480860|ref|XM_002275645.2|/0.0/PREDICTED: Vitis vinifera uncharacterized LOC100247348 (LOC100247348), mRNA	-	-	-	PTHR13650/0.0/--	-
PAU022538.1	scaffold51	-	A3SS	977482-977662	975216-977390	975216-977219	gi|359480861|ref|XP_002275681.2|/0/PREDICTED: uncharacterized protein LOC100247348 [Vitis vinifera]	gi|359480860|ref|XM_002275645.2|/0.0/PREDICTED: Vitis vinifera uncharacterized LOC100247348 (LOC100247348), mRNA	-	-	-	PTHR13650/0.0/--	-
PAU022538.1	scaffold51	-	RetainedIntron	958561-959313	gi|359480861|ref|XP_002275681.2|/0/PREDICTED: uncharacterized protein LOC100247348 [Vitis vinifera]	gi|359480860|ref|XM_002275645.2|/0.0/PREDICTED: Vitis vinifera uncharacterized LOC100247348 (LOC100247348), mRNA	-	-	-	PTHR13650/0.0/--	-
PAU022538.1	scaffold51	-	RetainedIntron	959738-959938	gi|359480861|ref|XP_002275681.2|/0/PREDICTED: uncharacterized protein LOC100247348 [Vitis vinifera]	gi|359480860|ref|XM_002275645.2|/0.0/PREDICTED: Vitis vinifera uncharacterized LOC100247348 (LOC100247348), mRNA	-	-	-	PTHR13650/0.0/--	-
PAU022553.1	scaffold51	-	RetainedIntron	1137542-1138272	gi|604319963|gb|EYU31127.1|/0/hypothetical protein MIMGU_mgv1a000549mg [Erythranthe guttata]	gi|470106070|ref|XM_004289351.1|/0.0/PREDICTED: Fragaria vesca subsp. vesca cellulose synthase A catalytic subunit 6 [UDP-forming]-like (LOC101311917), mRNA	sp|O48947|CESA2_ARATH/0.0/Cellulose synthase A catalytic subunit 2 [UDP-forming] OS=Arabidopsis thaliana GN=CESA2 PE=1 SV=1	pop:POPTR_819877/0.0/cellulose synthase A (EC:2.4.1.12); K10999 cellulose synthase A [EC:2.4.1.12]	alr3757/1e-15/---	PTHR13301:SF30/0.0/--	biological_process:GO:0030244//cellulose biosynthetic process;cellular_component:GO:0016021//integral component of membrane;molecular_function:GO:0016760//cellulose synthase (UDP-forming) activity;GO:0008270//zinc ion binding;
PAU022553.1	scaffold51	-	RetainedIntron	1138411-1138602	gi|604319963|gb|EYU31127.1|/0/hypothetical protein MIMGU_mgv1a000549mg [Erythranthe guttata]	gi|470106070|ref|XM_004289351.1|/0.0/PREDICTED: Fragaria vesca subsp. vesca cellulose synthase A catalytic subunit 6 [UDP-forming]-like (LOC101311917), mRNA	sp|O48947|CESA2_ARATH/0.0/Cellulose synthase A catalytic subunit 2 [UDP-forming] OS=Arabidopsis thaliana GN=CESA2 PE=1 SV=1	pop:POPTR_819877/0.0/cellulose synthase A (EC:2.4.1.12); K10999 cellulose synthase A [EC:2.4.1.12]	alr3757/1e-15/---	PTHR13301:SF30/0.0/--	biological_process:GO:0030244//cellulose biosynthetic process;cellular_component:GO:0016021//integral component of membrane;molecular_function:GO:0016760//cellulose synthase (UDP-forming) activity;GO:0008270//zinc ion binding;
PAU022553.1	scaffold51	-	RetainedIntron	1140529-1140631	gi|604319963|gb|EYU31127.1|/0/hypothetical protein MIMGU_mgv1a000549mg [Erythranthe guttata]	gi|470106070|ref|XM_004289351.1|/0.0/PREDICTED: Fragaria vesca subsp. vesca cellulose synthase A catalytic subunit 6 [UDP-forming]-like (LOC101311917), mRNA	sp|O48947|CESA2_ARATH/0.0/Cellulose synthase A catalytic subunit 2 [UDP-forming] OS=Arabidopsis thaliana GN=CESA2 PE=1 SV=1	pop:POPTR_819877/0.0/cellulose synthase A (EC:2.4.1.12); K10999 cellulose synthase A [EC:2.4.1.12]	alr3757/1e-15/---	PTHR13301:SF30/0.0/--	biological_process:GO:0030244//cellulose biosynthetic process;cellular_component:GO:0016021//integral component of membrane;molecular_function:GO:0016760//cellulose synthase (UDP-forming) activity;GO:0008270//zinc ion binding;
PAU022553.1	scaffold51	-	RetainedIntron	1140828-1141766	gi|604319963|gb|EYU31127.1|/0/hypothetical protein MIMGU_mgv1a000549mg [Erythranthe guttata]	gi|470106070|ref|XM_004289351.1|/0.0/PREDICTED: Fragaria vesca subsp. vesca cellulose synthase A catalytic subunit 6 [UDP-forming]-like (LOC101311917), mRNA	sp|O48947|CESA2_ARATH/0.0/Cellulose synthase A catalytic subunit 2 [UDP-forming] OS=Arabidopsis thaliana GN=CESA2 PE=1 SV=1	pop:POPTR_819877/0.0/cellulose synthase A (EC:2.4.1.12); K10999 cellulose synthase A [EC:2.4.1.12]	alr3757/1e-15/---	PTHR13301:SF30/0.0/--	biological_process:GO:0030244//cellulose biosynthetic process;cellular_component:GO:0016021//integral component of membrane;molecular_function:GO:0016760//cellulose synthase (UDP-forming) activity;GO:0008270//zinc ion binding;
PAU022553.1	scaffold51	-	RetainedIntron	1136281-1136359	gi|604319963|gb|EYU31127.1|/0/hypothetical protein MIMGU_mgv1a000549mg [Erythranthe guttata]	gi|470106070|ref|XM_004289351.1|/0.0/PREDICTED: Fragaria vesca subsp. vesca cellulose synthase A catalytic subunit 6 [UDP-forming]-like (LOC101311917), mRNA	sp|O48947|CESA2_ARATH/0.0/Cellulose synthase A catalytic subunit 2 [UDP-forming] OS=Arabidopsis thaliana GN=CESA2 PE=1 SV=1	pop:POPTR_819877/0.0/cellulose synthase A (EC:2.4.1.12); K10999 cellulose synthase A [EC:2.4.1.12]	alr3757/1e-15/---	PTHR13301:SF30/0.0/--	biological_process:GO:0030244//cellulose biosynthetic process;cellular_component:GO:0016021//integral component of membrane;molecular_function:GO:0016760//cellulose synthase (UDP-forming) activity;GO:0008270//zinc ion binding;
PAU022553.1	scaffold51	-	RetainedIntron	1136978-1137059	gi|604319963|gb|EYU31127.1|/0/hypothetical protein MIMGU_mgv1a000549mg [Erythranthe guttata]	gi|470106070|ref|XM_004289351.1|/0.0/PREDICTED: Fragaria vesca subsp. vesca cellulose synthase A catalytic subunit 6 [UDP-forming]-like (LOC101311917), mRNA	sp|O48947|CESA2_ARATH/0.0/Cellulose synthase A catalytic subunit 2 [UDP-forming] OS=Arabidopsis thaliana GN=CESA2 PE=1 SV=1	pop:POPTR_819877/0.0/cellulose synthase A (EC:2.4.1.12); K10999 cellulose synthase A [EC:2.4.1.12]	alr3757/1e-15/---	PTHR13301:SF30/0.0/--	biological_process:GO:0030244//cellulose biosynthetic process;cellular_component:GO:0016021//integral component of membrane;molecular_function:GO:0016760//cellulose synthase (UDP-forming) activity;GO:0008270//zinc ion binding;
PAU022553.1	scaffold51	-	RetainedIntron	1137273-1137415	gi|604319963|gb|EYU31127.1|/0/hypothetical protein MIMGU_mgv1a000549mg [Erythranthe guttata]	gi|470106070|ref|XM_004289351.1|/0.0/PREDICTED: Fragaria vesca subsp. vesca cellulose synthase A catalytic subunit 6 [UDP-forming]-like (LOC101311917), mRNA	sp|O48947|CESA2_ARATH/0.0/Cellulose synthase A catalytic subunit 2 [UDP-forming] OS=Arabidopsis thaliana GN=CESA2 PE=1 SV=1	pop:POPTR_819877/0.0/cellulose synthase A (EC:2.4.1.12); K10999 cellulose synthase A [EC:2.4.1.12]	alr3757/1e-15/---	PTHR13301:SF30/0.0/--	biological_process:GO:0030244//cellulose biosynthetic process;cellular_component:GO:0016021//integral component of membrane;molecular_function:GO:0016760//cellulose synthase (UDP-forming) activity;GO:0008270//zinc ion binding;
PAU022553.1	scaffold51	-	RetainedIntron	1138949-1139270	gi|604319963|gb|EYU31127.1|/0/hypothetical protein MIMGU_mgv1a000549mg [Erythranthe guttata]	gi|470106070|ref|XM_004289351.1|/0.0/PREDICTED: Fragaria vesca subsp. vesca cellulose synthase A catalytic subunit 6 [UDP-forming]-like (LOC101311917), mRNA	sp|O48947|CESA2_ARATH/0.0/Cellulose synthase A catalytic subunit 2 [UDP-forming] OS=Arabidopsis thaliana GN=CESA2 PE=1 SV=1	pop:POPTR_819877/0.0/cellulose synthase A (EC:2.4.1.12); K10999 cellulose synthase A [EC:2.4.1.12]	alr3757/1e-15/---	PTHR13301:SF30/0.0/--	biological_process:GO:0030244//cellulose biosynthetic process;cellular_component:GO:0016021//integral component of membrane;molecular_function:GO:0016760//cellulose synthase (UDP-forming) activity;GO:0008270//zinc ion binding;
PAU022553.1	scaffold51	-	RetainedIntron	1140010-1140099	gi|604319963|gb|EYU31127.1|/0/hypothetical protein MIMGU_mgv1a000549mg [Erythranthe guttata]	gi|470106070|ref|XM_004289351.1|/0.0/PREDICTED: Fragaria vesca subsp. vesca cellulose synthase A catalytic subunit 6 [UDP-forming]-like (LOC101311917), mRNA	sp|O48947|CESA2_ARATH/0.0/Cellulose synthase A catalytic subunit 2 [UDP-forming] OS=Arabidopsis thaliana GN=CESA2 PE=1 SV=1	pop:POPTR_819877/0.0/cellulose synthase A (EC:2.4.1.12); K10999 cellulose synthase A [EC:2.4.1.12]	alr3757/1e-15/---	PTHR13301:SF30/0.0/--	biological_process:GO:0030244//cellulose biosynthetic process;cellular_component:GO:0016021//integral component of membrane;molecular_function:GO:0016760//cellulose synthase (UDP-forming) activity;GO:0008270//zinc ion binding;
PAU022614.1	scaffold510	-	RetainedIntron	133634-133733	gi|604343828|gb|EYU42662.1|/0/hypothetical protein MIMGU_mgv1a022120mg [Erythranthe guttata]	gi|47105261|gb|BT013846.1|/6e-25/Lycopersicon esculentum clone 132803R, mRNA sequence	sp|P52711|CBP23_HORVU/2e-136/Serine carboxypeptidase II-3 OS=Hordeum vulgare GN=CXP;2-3 PE=2 SV=1	vvi:100248712/0.0/serine carboxypeptidase II-3-like; K13289 cathepsin A (carboxypeptidase C) [EC:3.4.16.5]	YBR139w/1e-49/---	PTHR11802/2.1E-236/--	-
PAU022614.1	scaffold510	-	RetainedIntron	133840-133962	gi|604343828|gb|EYU42662.1|/0/hypothetical protein MIMGU_mgv1a022120mg [Erythranthe guttata]	gi|47105261|gb|BT013846.1|/6e-25/Lycopersicon esculentum clone 132803R, mRNA sequence	sp|P52711|CBP23_HORVU/2e-136/Serine carboxypeptidase II-3 OS=Hordeum vulgare GN=CXP;2-3 PE=2 SV=1	vvi:100248712/0.0/serine carboxypeptidase II-3-like; K13289 cathepsin A (carboxypeptidase C) [EC:3.4.16.5]	YBR139w/1e-49/---	PTHR11802/2.1E-236/--	-
PAU022614.1	scaffold510	-	RetainedIntron	134262-134355	gi|604343828|gb|EYU42662.1|/0/hypothetical protein MIMGU_mgv1a022120mg [Erythranthe guttata]	gi|47105261|gb|BT013846.1|/6e-25/Lycopersicon esculentum clone 132803R, mRNA sequence	sp|P52711|CBP23_HORVU/2e-136/Serine carboxypeptidase II-3 OS=Hordeum vulgare GN=CXP;2-3 PE=2 SV=1	vvi:100248712/0.0/serine carboxypeptidase II-3-like; K13289 cathepsin A (carboxypeptidase C) [EC:3.4.16.5]	YBR139w/1e-49/---	PTHR11802/2.1E-236/--	-
PAU022614.1	scaffold510	-	RetainedIntron	134599-134695	gi|604343828|gb|EYU42662.1|/0/hypothetical protein MIMGU_mgv1a022120mg [Erythranthe guttata]	gi|47105261|gb|BT013846.1|/6e-25/Lycopersicon esculentum clone 132803R, mRNA sequence	sp|P52711|CBP23_HORVU/2e-136/Serine carboxypeptidase II-3 OS=Hordeum vulgare GN=CXP;2-3 PE=2 SV=1	vvi:100248712/0.0/serine carboxypeptidase II-3-like; K13289 cathepsin A (carboxypeptidase C) [EC:3.4.16.5]	YBR139w/1e-49/---	PTHR11802/2.1E-236/--	-
PAU022614.1	scaffold510	-	RetainedIntron	134968-135053	gi|604343828|gb|EYU42662.1|/0/hypothetical protein MIMGU_mgv1a022120mg [Erythranthe guttata]	gi|47105261|gb|BT013846.1|/6e-25/Lycopersicon esculentum clone 132803R, mRNA sequence	sp|P52711|CBP23_HORVU/2e-136/Serine carboxypeptidase II-3 OS=Hordeum vulgare GN=CXP;2-3 PE=2 SV=1	vvi:100248712/0.0/serine carboxypeptidase II-3-like; K13289 cathepsin A (carboxypeptidase C) [EC:3.4.16.5]	YBR139w/1e-49/---	PTHR11802/2.1E-236/--	-
PAU022614.1	scaffold510	-	RetainedIntron	135162-135519	gi|604343828|gb|EYU42662.1|/0/hypothetical protein MIMGU_mgv1a022120mg [Erythranthe guttata]	gi|47105261|gb|BT013846.1|/6e-25/Lycopersicon esculentum clone 132803R, mRNA sequence	sp|P52711|CBP23_HORVU/2e-136/Serine carboxypeptidase II-3 OS=Hordeum vulgare GN=CXP;2-3 PE=2 SV=1	vvi:100248712/0.0/serine carboxypeptidase II-3-like; K13289 cathepsin A (carboxypeptidase C) [EC:3.4.16.5]	YBR139w/1e-49/---	PTHR11802/2.1E-236/--	-
PAU024585.1	scaffold579	+	RetainedIntron	12332-12735	gi|604299230|gb|EYU19165.1|/4.61749e-121/hypothetical protein MIMGU_mgv1a012191mg [Erythranthe guttata]	gi|225317466|dbj|AK329033.1|/3e-62/Solanum lycopersicum cDNA, clone: LEFL3081M05, HTC in root	sp|Q1ECE0|VAP41_ARATH/2e-95/Vesicle-associated protein 4-1 OS=Arabidopsis thaliana GN=PVA41 PE=2 SV=1	-	-	PF00635/5.2E-25/MSP (Major sperm protein) domain	-
PAU024585.1	scaffold579	+	RetainedIntron	13092-14594	gi|604299230|gb|EYU19165.1|/4.61749e-121/hypothetical protein MIMGU_mgv1a012191mg [Erythranthe guttata]	gi|225317466|dbj|AK329033.1|/3e-62/Solanum lycopersicum cDNA, clone: LEFL3081M05, HTC in root	sp|Q1ECE0|VAP41_ARATH/2e-95/Vesicle-associated protein 4-1 OS=Arabidopsis thaliana GN=PVA41 PE=2 SV=1	-	-	PF00635/5.2E-25/MSP (Major sperm protein) domain	-
PAU024585.1	scaffold579	+	RetainedIntron	14673-14757	gi|604299230|gb|EYU19165.1|/4.61749e-121/hypothetical protein MIMGU_mgv1a012191mg [Erythranthe guttata]	gi|225317466|dbj|AK329033.1|/3e-62/Solanum lycopersicum cDNA, clone: LEFL3081M05, HTC in root	sp|Q1ECE0|VAP41_ARATH/2e-95/Vesicle-associated protein 4-1 OS=Arabidopsis thaliana GN=PVA41 PE=2 SV=1	-	-	PF00635/5.2E-25/MSP (Major sperm protein) domain	-
PAU024719.1	scaffold583	-	RetainedIntron	150817-151280	gi|604330058|gb|EYU35178.1|/2.12103e-161/hypothetical protein MIMGU_mgv1a009232mg [Erythranthe guttata]	gi|359486428|ref|XM_002267141.2|/6e-81/PREDICTED: Vitis vinifera quinone oxidoreductase-like protein 2 homolog (LOC100253655), mRNA	sp|P52839|SOT12_ARATH/1e-59/Cytosolic sulfotransferase 12 OS=Arabidopsis thaliana GN=SOT12 PE=1 SV=2	ath:AT1G74100/1e-49/SOT16; sulfotransferase 16; K11821 desulfoglucosinolate sulfotransferase A/B/C [EC:2.8.2.-]	DRA0251/6e-59/---	SM00829/5.9E-27/Enoylreductase	-
PAU024719.1	scaffold583	-	RetainedIntron	151425-152209	gi|604330058|gb|EYU35178.1|/2.12103e-161/hypothetical protein MIMGU_mgv1a009232mg [Erythranthe guttata]	gi|359486428|ref|XM_002267141.2|/6e-81/PREDICTED: Vitis vinifera quinone oxidoreductase-like protein 2 homolog (LOC100253655), mRNA	sp|P52839|SOT12_ARATH/1e-59/Cytosolic sulfotransferase 12 OS=Arabidopsis thaliana GN=SOT12 PE=1 SV=2	ath:AT1G74100/1e-49/SOT16; sulfotransferase 16; K11821 desulfoglucosinolate sulfotransferase A/B/C [EC:2.8.2.-]	DRA0251/6e-59/---	SM00829/5.9E-27/Enoylreductase	-
PAU025985.1	scaffold621	+	RetainedIntron	136557-137412	gi|604316754|gb|EYU28946.1|/0/hypothetical protein MIMGU_mgv1a000453mg [Erythranthe guttata]	gi|148538727|dbj|AK247493.1|/3e-35/Solanum lycopersicum cDNA, clone: LEFL1034CF03, HTC in leaf	sp|Q5PP26|PII2_ARATH/3e-128/Piriformospora indica-insensitive protein 2 OS=Arabidopsis thaliana GN=PII-2 PE=2 SV=1	ath:AT5G46330/1e-36/FLS2; LRR receptor-like serine/threonine-protein kinase FLS2; K13420 LRR receptor-like serine/threonine-protein kinase FLS2 [EC:2.7.11.1]	MK0690/2e-28/---	SM00369/150.0/Leucine-rich repeats, typical (most populated) subfamily	-
PAU025985.1	scaffold621	+	RetainedIntron	138034-138116	gi|604316754|gb|EYU28946.1|/0/hypothetical protein MIMGU_mgv1a000453mg [Erythranthe guttata]	gi|148538727|dbj|AK247493.1|/3e-35/Solanum lycopersicum cDNA, clone: LEFL1034CF03, HTC in leaf	sp|Q5PP26|PII2_ARATH/3e-128/Piriformospora indica-insensitive protein 2 OS=Arabidopsis thaliana GN=PII-2 PE=2 SV=1	ath:AT5G46330/1e-36/FLS2; LRR receptor-like serine/threonine-protein kinase FLS2; K13420 LRR receptor-like serine/threonine-protein kinase FLS2 [EC:2.7.11.1]	MK0690/2e-28/---	SM00369/150.0/Leucine-rich repeats, typical (most populated) subfamily	-
PAU025985.1	scaffold621	+	RetainedIntron	138201-139054	gi|604316754|gb|EYU28946.1|/0/hypothetical protein MIMGU_mgv1a000453mg [Erythranthe guttata]	gi|148538727|dbj|AK247493.1|/3e-35/Solanum lycopersicum cDNA, clone: LEFL1034CF03, HTC in leaf	sp|Q5PP26|PII2_ARATH/3e-128/Piriformospora indica-insensitive protein 2 OS=Arabidopsis thaliana GN=PII-2 PE=2 SV=1	ath:AT5G46330/1e-36/FLS2; LRR receptor-like serine/threonine-protein kinase FLS2; K13420 LRR receptor-like serine/threonine-protein kinase FLS2 [EC:2.7.11.1]	MK0690/2e-28/---	SM00369/150.0/Leucine-rich repeats, typical (most populated) subfamily	-
PAU025985.1	scaffold621	+	RetainedIntron	141043-141751	gi|604316754|gb|EYU28946.1|/0/hypothetical protein MIMGU_mgv1a000453mg [Erythranthe guttata]	gi|148538727|dbj|AK247493.1|/3e-35/Solanum lycopersicum cDNA, clone: LEFL1034CF03, HTC in leaf	sp|Q5PP26|PII2_ARATH/3e-128/Piriformospora indica-insensitive protein 2 OS=Arabidopsis thaliana GN=PII-2 PE=2 SV=1	ath:AT5G46330/1e-36/FLS2; LRR receptor-like serine/threonine-protein kinase FLS2; K13420 LRR receptor-like serine/threonine-protein kinase FLS2 [EC:2.7.11.1]	MK0690/2e-28/---	SM00369/150.0/Leucine-rich repeats, typical (most populated) subfamily	-
PAU025985.1	scaffold621	+	RetainedIntron	144904-145688	gi|604316754|gb|EYU28946.1|/0/hypothetical protein MIMGU_mgv1a000453mg [Erythranthe guttata]	gi|148538727|dbj|AK247493.1|/3e-35/Solanum lycopersicum cDNA, clone: LEFL1034CF03, HTC in leaf	sp|Q5PP26|PII2_ARATH/3e-128/Piriformospora indica-insensitive protein 2 OS=Arabidopsis thaliana GN=PII-2 PE=2 SV=1	ath:AT5G46330/1e-36/FLS2; LRR receptor-like serine/threonine-protein kinase FLS2; K13420 LRR receptor-like serine/threonine-protein kinase FLS2 [EC:2.7.11.1]	MK0690/2e-28/---	SM00369/150.0/Leucine-rich repeats, typical (most populated) subfamily	-
PAU026172.1	scaffold63	-	RetainedIntron	377593-377726	gi|604343944|gb|EYU42761.1|/7.7758e-56/hypothetical protein MIMGU_mgv1a016693mg [Erythranthe guttata]	gi|363806727|ref|NM_001255087.1|/8e-24/Glycine max UPF0451 protein C17orf61 homolog (LOC100816932), mRNA	-	-	SPAC1782.12c/2e-11/---	PTHR10580/5.5E-37/--	-
PAU026758.1	scaffold660	-	A5SS	152437-152550	153150-153349	153146-153349	gi|604344006|gb|EYU42823.1|/2.0969e-150/hypothetical protein MIMGU_mgv1a019299mg [Erythranthe guttata]	gi|349714900|emb|FQ380400.1|/1e-128/Vitis vinifera clone SS0ACG64YG10	sp|F4JJE0|CCT2_ARATH/8e-118/Choline-phosphate cytidylyltransferase 2 OS=Arabidopsis thaliana GN=CCT2 PE=1 SV=1	vvi:100255284/2e-133/zinc transporter 5-like; K14709 solute carrier family 39 (zinc transporter), member 1/2/3	SPCC1827.02c/1e-61/---	PF01467/1.9E-22/Cytidylyltransferase	-
PAU026758.1	scaffold660	-	RetainedIntron	148857-148967	gi|604344006|gb|EYU42823.1|/2.0969e-150/hypothetical protein MIMGU_mgv1a019299mg [Erythranthe guttata]	gi|349714900|emb|FQ380400.1|/1e-128/Vitis vinifera clone SS0ACG64YG10	sp|F4JJE0|CCT2_ARATH/8e-118/Choline-phosphate cytidylyltransferase 2 OS=Arabidopsis thaliana GN=CCT2 PE=1 SV=1	vvi:100255284/2e-133/zinc transporter 5-like; K14709 solute carrier family 39 (zinc transporter), member 1/2/3	SPCC1827.02c/1e-61/---	PF01467/1.9E-22/Cytidylyltransferase	-
PAU026758.1	scaffold660	-	RetainedIntron	149079-149914	gi|604344006|gb|EYU42823.1|/2.0969e-150/hypothetical protein MIMGU_mgv1a019299mg [Erythranthe guttata]	gi|349714900|emb|FQ380400.1|/1e-128/Vitis vinifera clone SS0ACG64YG10	sp|F4JJE0|CCT2_ARATH/8e-118/Choline-phosphate cytidylyltransferase 2 OS=Arabidopsis thaliana GN=CCT2 PE=1 SV=1	vvi:100255284/2e-133/zinc transporter 5-like; K14709 solute carrier family 39 (zinc transporter), member 1/2/3	SPCC1827.02c/1e-61/---	PF01467/1.9E-22/Cytidylyltransferase	-
PAU026758.1	scaffold660	-	RetainedIntron	150302-150438	gi|604344006|gb|EYU42823.1|/2.0969e-150/hypothetical protein MIMGU_mgv1a019299mg [Erythranthe guttata]	gi|349714900|emb|FQ380400.1|/1e-128/Vitis vinifera clone SS0ACG64YG10	sp|F4JJE0|CCT2_ARATH/8e-118/Choline-phosphate cytidylyltransferase 2 OS=Arabidopsis thaliana GN=CCT2 PE=1 SV=1	vvi:100255284/2e-133/zinc transporter 5-like; K14709 solute carrier family 39 (zinc transporter), member 1/2/3	SPCC1827.02c/1e-61/---	PF01467/1.9E-22/Cytidylyltransferase	-
PAU026758.1	scaffold660	-	RetainedIntron	150482-151958	gi|604344006|gb|EYU42823.1|/2.0969e-150/hypothetical protein MIMGU_mgv1a019299mg [Erythranthe guttata]	gi|349714900|emb|FQ380400.1|/1e-128/Vitis vinifera clone SS0ACG64YG10	sp|F4JJE0|CCT2_ARATH/8e-118/Choline-phosphate cytidylyltransferase 2 OS=Arabidopsis thaliana GN=CCT2 PE=1 SV=1	vvi:100255284/2e-133/zinc transporter 5-like; K14709 solute carrier family 39 (zinc transporter), member 1/2/3	SPCC1827.02c/1e-61/---	PF01467/1.9E-22/Cytidylyltransferase	-
PAU026758.1	scaffold660	-	RetainedIntron	152055-152436	gi|604344006|gb|EYU42823.1|/2.0969e-150/hypothetical protein MIMGU_mgv1a019299mg [Erythranthe guttata]	gi|349714900|emb|FQ380400.1|/1e-128/Vitis vinifera clone SS0ACG64YG10	sp|F4JJE0|CCT2_ARATH/8e-118/Choline-phosphate cytidylyltransferase 2 OS=Arabidopsis thaliana GN=CCT2 PE=1 SV=1	vvi:100255284/2e-133/zinc transporter 5-like; K14709 solute carrier family 39 (zinc transporter), member 1/2/3	SPCC1827.02c/1e-61/---	PF01467/1.9E-22/Cytidylyltransferase	-
PAU026758.1	scaffold660	-	RetainedIntron	152551-153149	gi|604344006|gb|EYU42823.1|/2.0969e-150/hypothetical protein MIMGU_mgv1a019299mg [Erythranthe guttata]	gi|349714900|emb|FQ380400.1|/1e-128/Vitis vinifera clone SS0ACG64YG10	sp|F4JJE0|CCT2_ARATH/8e-118/Choline-phosphate cytidylyltransferase 2 OS=Arabidopsis thaliana GN=CCT2 PE=1 SV=1	vvi:100255284/2e-133/zinc transporter 5-like; K14709 solute carrier family 39 (zinc transporter), member 1/2/3	SPCC1827.02c/1e-61/---	PF01467/1.9E-22/Cytidylyltransferase	-
PAU026868.1	scaffold672	-	A3SS	106614-106697	105384-105580	105384-105578	gi|604298914|gb|EYU18884.1|/0/hypothetical protein MIMGU_mgv1a001442mg [Erythranthe guttata]	gi|225435194|ref|XM_002281973.1|/0.0/PREDICTED: Vitis vinifera vacuolar proton translocating ATPase 100 kDa subunit-like (LOC100250193), mRNA	sp|Q8RWZ7|VHAA1_ARATH/0.0/Vacuolar proton ATPase a1 OS=Arabidopsis thaliana GN=VHA-a1 PE=2 SV=1	vvi:100250193/0.0/vacuolar proton translocating ATPase 100 kDa subunit-like; K02154 V-type H+-transporting ATPase subunit I [EC:3.6.3.14]	SPAC16E8.07c/9e-140/---	PTHR11629:SF62/0.0/--	biological_process:GO:0015991//ATP hydrolysis coupled proton transport;cellular_component:GO:0000220//vacuolar proton-transporting V-type ATPase, V0 domain;molecular_function:GO:0016787//hydrolase activity;GO:0015078//hydrogen ion transmembrane transporter activity;
PAU026868.1	scaffold672	-	A3SS	109688-109841	108212-108372	108212-108361	gi|604298914|gb|EYU18884.1|/0/hypothetical protein MIMGU_mgv1a001442mg [Erythranthe guttata]	gi|225435194|ref|XM_002281973.1|/0.0/PREDICTED: Vitis vinifera vacuolar proton translocating ATPase 100 kDa subunit-like (LOC100250193), mRNA	sp|Q8RWZ7|VHAA1_ARATH/0.0/Vacuolar proton ATPase a1 OS=Arabidopsis thaliana GN=VHA-a1 PE=2 SV=1	vvi:100250193/0.0/vacuolar proton translocating ATPase 100 kDa subunit-like; K02154 V-type H+-transporting ATPase subunit I [EC:3.6.3.14]	SPAC16E8.07c/9e-140/---	PTHR11629:SF62/0.0/--	biological_process:GO:0015991//ATP hydrolysis coupled proton transport;cellular_component:GO:0000220//vacuolar proton-transporting V-type ATPase, V0 domain;molecular_function:GO:0016787//hydrolase activity;GO:0015078//hydrogen ion transmembrane transporter activity;
PAU026868.1	scaffold672	-	A3SS	113736-113849	113470-113643	113470-113663	gi|604298914|gb|EYU18884.1|/0/hypothetical protein MIMGU_mgv1a001442mg [Erythranthe guttata]	gi|225435194|ref|XM_002281973.1|/0.0/PREDICTED: Vitis vinifera vacuolar proton translocating ATPase 100 kDa subunit-like (LOC100250193), mRNA	sp|Q8RWZ7|VHAA1_ARATH/0.0/Vacuolar proton ATPase a1 OS=Arabidopsis thaliana GN=VHA-a1 PE=2 SV=1	vvi:100250193/0.0/vacuolar proton translocating ATPase 100 kDa subunit-like; K02154 V-type H+-transporting ATPase subunit I [EC:3.6.3.14]	SPAC16E8.07c/9e-140/---	PTHR11629:SF62/0.0/--	biological_process:GO:0015991//ATP hydrolysis coupled proton transport;cellular_component:GO:0000220//vacuolar proton-transporting V-type ATPase, V0 domain;molecular_function:GO:0016787//hydrolase activity;GO:0015078//hydrogen ion transmembrane transporter activity;
PAU026868.1	scaffold672	-	RetainedIntron	103739-105238	gi|604298914|gb|EYU18884.1|/0/hypothetical protein MIMGU_mgv1a001442mg [Erythranthe guttata]	gi|225435194|ref|XM_002281973.1|/0.0/PREDICTED: Vitis vinifera vacuolar proton translocating ATPase 100 kDa subunit-like (LOC100250193), mRNA	sp|Q8RWZ7|VHAA1_ARATH/0.0/Vacuolar proton ATPase a1 OS=Arabidopsis thaliana GN=VHA-a1 PE=2 SV=1	vvi:100250193/0.0/vacuolar proton translocating ATPase 100 kDa subunit-like; K02154 V-type H+-transporting ATPase subunit I [EC:3.6.3.14]	SPAC16E8.07c/9e-140/---	PTHR11629:SF62/0.0/--	biological_process:GO:0015991//ATP hydrolysis coupled proton transport;cellular_component:GO:0000220//vacuolar proton-transporting V-type ATPase, V0 domain;molecular_function:GO:0016787//hydrolase activity;GO:0015078//hydrogen ion transmembrane transporter activity;
PAU026868.1	scaffold672	-	RetainedIntron	105299-105383	gi|604298914|gb|EYU18884.1|/0/hypothetical protein MIMGU_mgv1a001442mg [Erythranthe guttata]	gi|225435194|ref|XM_002281973.1|/0.0/PREDICTED: Vitis vinifera vacuolar proton translocating ATPase 100 kDa subunit-like (LOC100250193), mRNA	sp|Q8RWZ7|VHAA1_ARATH/0.0/Vacuolar proton ATPase a1 OS=Arabidopsis thaliana GN=VHA-a1 PE=2 SV=1	vvi:100250193/0.0/vacuolar proton translocating ATPase 100 kDa subunit-like; K02154 V-type H+-transporting ATPase subunit I [EC:3.6.3.14]	SPAC16E8.07c/9e-140/---	PTHR11629:SF62/0.0/--	biological_process:GO:0015991//ATP hydrolysis coupled proton transport;cellular_component:GO:0000220//vacuolar proton-transporting V-type ATPase, V0 domain;molecular_function:GO:0016787//hydrolase activity;GO:0015078//hydrogen ion transmembrane transporter activity;
PAU026868.1	scaffold672	-	RetainedIntron	105581-106613	gi|604298914|gb|EYU18884.1|/0/hypothetical protein MIMGU_mgv1a001442mg [Erythranthe guttata]	gi|225435194|ref|XM_002281973.1|/0.0/PREDICTED: Vitis vinifera vacuolar proton translocating ATPase 100 kDa subunit-like (LOC100250193), mRNA	sp|Q8RWZ7|VHAA1_ARATH/0.0/Vacuolar proton ATPase a1 OS=Arabidopsis thaliana GN=VHA-a1 PE=2 SV=1	vvi:100250193/0.0/vacuolar proton translocating ATPase 100 kDa subunit-like; K02154 V-type H+-transporting ATPase subunit I [EC:3.6.3.14]	SPAC16E8.07c/9e-140/---	PTHR11629:SF62/0.0/--	biological_process:GO:0015991//ATP hydrolysis coupled proton transport;cellular_component:GO:0000220//vacuolar proton-transporting V-type ATPase, V0 domain;molecular_function:GO:0016787//hydrolase activity;GO:0015078//hydrogen ion transmembrane transporter activity;
PAU026868.1	scaffold672	-	RetainedIntron	107264-108211	gi|604298914|gb|EYU18884.1|/0/hypothetical protein MIMGU_mgv1a001442mg [Erythranthe guttata]	gi|225435194|ref|XM_002281973.1|/0.0/PREDICTED: Vitis vinifera vacuolar proton translocating ATPase 100 kDa subunit-like (LOC100250193), mRNA	sp|Q8RWZ7|VHAA1_ARATH/0.0/Vacuolar proton ATPase a1 OS=Arabidopsis thaliana GN=VHA-a1 PE=2 SV=1	vvi:100250193/0.0/vacuolar proton translocating ATPase 100 kDa subunit-like; K02154 V-type H+-transporting ATPase subunit I [EC:3.6.3.14]	SPAC16E8.07c/9e-140/---	PTHR11629:SF62/0.0/--	biological_process:GO:0015991//ATP hydrolysis coupled proton transport;cellular_component:GO:0000220//vacuolar proton-transporting V-type ATPase, V0 domain;molecular_function:GO:0016787//hydrolase activity;GO:0015078//hydrogen ion transmembrane transporter activity;
PAU026868.1	scaffold672	-	RetainedIntron	108373-109687	gi|604298914|gb|EYU18884.1|/0/hypothetical protein MIMGU_mgv1a001442mg [Erythranthe guttata]	gi|225435194|ref|XM_002281973.1|/0.0/PREDICTED: Vitis vinifera vacuolar proton translocating ATPase 100 kDa subunit-like (LOC100250193), mRNA	sp|Q8RWZ7|VHAA1_ARATH/0.0/Vacuolar proton ATPase a1 OS=Arabidopsis thaliana GN=VHA-a1 PE=2 SV=1	vvi:100250193/0.0/vacuolar proton translocating ATPase 100 kDa subunit-like; K02154 V-type H+-transporting ATPase subunit I [EC:3.6.3.14]	SPAC16E8.07c/9e-140/---	PTHR11629:SF62/0.0/--	biological_process:GO:0015991//ATP hydrolysis coupled proton transport;cellular_component:GO:0000220//vacuolar proton-transporting V-type ATPase, V0 domain;molecular_function:GO:0016787//hydrolase activity;GO:0015078//hydrogen ion transmembrane transporter activity;
PAU026868.1	scaffold672	-	RetainedIntron	109842-112236	gi|604298914|gb|EYU18884.1|/0/hypothetical protein MIMGU_mgv1a001442mg [Erythranthe guttata]	gi|225435194|ref|XM_002281973.1|/0.0/PREDICTED: Vitis vinifera vacuolar proton translocating ATPase 100 kDa subunit-like (LOC100250193), mRNA	sp|Q8RWZ7|VHAA1_ARATH/0.0/Vacuolar proton ATPase a1 OS=Arabidopsis thaliana GN=VHA-a1 PE=2 SV=1	vvi:100250193/0.0/vacuolar proton translocating ATPase 100 kDa subunit-like; K02154 V-type H+-transporting ATPase subunit I [EC:3.6.3.14]	SPAC16E8.07c/9e-140/---	PTHR11629:SF62/0.0/--	biological_process:GO:0015991//ATP hydrolysis coupled proton transport;cellular_component:GO:0000220//vacuolar proton-transporting V-type ATPase, V0 domain;molecular_function:GO:0016787//hydrolase activity;GO:0015078//hydrogen ion transmembrane transporter activity;
PAU026868.1	scaffold672	-	RetainedIntron	112386-112490	gi|604298914|gb|EYU18884.1|/0/hypothetical protein MIMGU_mgv1a001442mg [Erythranthe guttata]	gi|225435194|ref|XM_002281973.1|/0.0/PREDICTED: Vitis vinifera vacuolar proton translocating ATPase 100 kDa subunit-like (LOC100250193), mRNA	sp|Q8RWZ7|VHAA1_ARATH/0.0/Vacuolar proton ATPase a1 OS=Arabidopsis thaliana GN=VHA-a1 PE=2 SV=1	vvi:100250193/0.0/vacuolar proton translocating ATPase 100 kDa subunit-like; K02154 V-type H+-transporting ATPase subunit I [EC:3.6.3.14]	SPAC16E8.07c/9e-140/---	PTHR11629:SF62/0.0/--	biological_process:GO:0015991//ATP hydrolysis coupled proton transport;cellular_component:GO:0000220//vacuolar proton-transporting V-type ATPase, V0 domain;molecular_function:GO:0016787//hydrolase activity;GO:0015078//hydrogen ion transmembrane transporter activity;
PAU026868.1	scaffold672	-	RetainedIntron	112599-112691	gi|604298914|gb|EYU18884.1|/0/hypothetical protein MIMGU_mgv1a001442mg [Erythranthe guttata]	gi|225435194|ref|XM_002281973.1|/0.0/PREDICTED: Vitis vinifera vacuolar proton translocating ATPase 100 kDa subunit-like (LOC100250193), mRNA	sp|Q8RWZ7|VHAA1_ARATH/0.0/Vacuolar proton ATPase a1 OS=Arabidopsis thaliana GN=VHA-a1 PE=2 SV=1	vvi:100250193/0.0/vacuolar proton translocating ATPase 100 kDa subunit-like; K02154 V-type H+-transporting ATPase subunit I [EC:3.6.3.14]	SPAC16E8.07c/9e-140/---	PTHR11629:SF62/0.0/--	biological_process:GO:0015991//ATP hydrolysis coupled proton transport;cellular_component:GO:0000220//vacuolar proton-transporting V-type ATPase, V0 domain;molecular_function:GO:0016787//hydrolase activity;GO:0015078//hydrogen ion transmembrane transporter activity;
PAU026868.1	scaffold672	-	RetainedIntron	112800-113093	gi|604298914|gb|EYU18884.1|/0/hypothetical protein MIMGU_mgv1a001442mg [Erythranthe guttata]	gi|225435194|ref|XM_002281973.1|/0.0/PREDICTED: Vitis vinifera vacuolar proton translocating ATPase 100 kDa subunit-like (LOC100250193), mRNA	sp|Q8RWZ7|VHAA1_ARATH/0.0/Vacuolar proton ATPase a1 OS=Arabidopsis thaliana GN=VHA-a1 PE=2 SV=1	vvi:100250193/0.0/vacuolar proton translocating ATPase 100 kDa subunit-like; K02154 V-type H+-transporting ATPase subunit I [EC:3.6.3.14]	SPAC16E8.07c/9e-140/---	PTHR11629:SF62/0.0/--	biological_process:GO:0015991//ATP hydrolysis coupled proton transport;cellular_component:GO:0000220//vacuolar proton-transporting V-type ATPase, V0 domain;molecular_function:GO:0016787//hydrolase activity;GO:0015078//hydrogen ion transmembrane transporter activity;
PAU026868.1	scaffold672	-	RetainedIntron	113232-113469	gi|604298914|gb|EYU18884.1|/0/hypothetical protein MIMGU_mgv1a001442mg [Erythranthe guttata]	gi|225435194|ref|XM_002281973.1|/0.0/PREDICTED: Vitis vinifera vacuolar proton translocating ATPase 100 kDa subunit-like (LOC100250193), mRNA	sp|Q8RWZ7|VHAA1_ARATH/0.0/Vacuolar proton ATPase a1 OS=Arabidopsis thaliana GN=VHA-a1 PE=2 SV=1	vvi:100250193/0.0/vacuolar proton translocating ATPase 100 kDa subunit-like; K02154 V-type H+-transporting ATPase subunit I [EC:3.6.3.14]	SPAC16E8.07c/9e-140/---	PTHR11629:SF62/0.0/--	biological_process:GO:0015991//ATP hydrolysis coupled proton transport;cellular_component:GO:0000220//vacuolar proton-transporting V-type ATPase, V0 domain;molecular_function:GO:0016787//hydrolase activity;GO:0015078//hydrogen ion transmembrane transporter activity;
PAU026868.1	scaffold672	-	RetainedIntron	113644-113735	gi|604298914|gb|EYU18884.1|/0/hypothetical protein MIMGU_mgv1a001442mg [Erythranthe guttata]	gi|225435194|ref|XM_002281973.1|/0.0/PREDICTED: Vitis vinifera vacuolar proton translocating ATPase 100 kDa subunit-like (LOC100250193), mRNA	sp|Q8RWZ7|VHAA1_ARATH/0.0/Vacuolar proton ATPase a1 OS=Arabidopsis thaliana GN=VHA-a1 PE=2 SV=1	vvi:100250193/0.0/vacuolar proton translocating ATPase 100 kDa subunit-like; K02154 V-type H+-transporting ATPase subunit I [EC:3.6.3.14]	SPAC16E8.07c/9e-140/---	PTHR11629:SF62/0.0/--	biological_process:GO:0015991//ATP hydrolysis coupled proton transport;cellular_component:GO:0000220//vacuolar proton-transporting V-type ATPase, V0 domain;molecular_function:GO:0016787//hydrolase activity;GO:0015078//hydrogen ion transmembrane transporter activity;
PAU026868.1	scaffold672	-	RetainedIntron	115322-117383	gi|604298914|gb|EYU18884.1|/0/hypothetical protein MIMGU_mgv1a001442mg [Erythranthe guttata]	gi|225435194|ref|XM_002281973.1|/0.0/PREDICTED: Vitis vinifera vacuolar proton translocating ATPase 100 kDa subunit-like (LOC100250193), mRNA	sp|Q8RWZ7|VHAA1_ARATH/0.0/Vacuolar proton ATPase a1 OS=Arabidopsis thaliana GN=VHA-a1 PE=2 SV=1	vvi:100250193/0.0/vacuolar proton translocating ATPase 100 kDa subunit-like; K02154 V-type H+-transporting ATPase subunit I [EC:3.6.3.14]	SPAC16E8.07c/9e-140/---	PTHR11629:SF62/0.0/--	biological_process:GO:0015991//ATP hydrolysis coupled proton transport;cellular_component:GO:0000220//vacuolar proton-transporting V-type ATPase, V0 domain;molecular_function:GO:0016787//hydrolase activity;GO:0015078//hydrogen ion transmembrane transporter activity;
PAU026868.1	scaffold672	-	RetainedIntron	117429-118116	gi|604298914|gb|EYU18884.1|/0/hypothetical protein MIMGU_mgv1a001442mg [Erythranthe guttata]	gi|225435194|ref|XM_002281973.1|/0.0/PREDICTED: Vitis vinifera vacuolar proton translocating ATPase 100 kDa subunit-like (LOC100250193), mRNA	sp|Q8RWZ7|VHAA1_ARATH/0.0/Vacuolar proton ATPase a1 OS=Arabidopsis thaliana GN=VHA-a1 PE=2 SV=1	vvi:100250193/0.0/vacuolar proton translocating ATPase 100 kDa subunit-like; K02154 V-type H+-transporting ATPase subunit I [EC:3.6.3.14]	SPAC16E8.07c/9e-140/---	PTHR11629:SF62/0.0/--	biological_process:GO:0015991//ATP hydrolysis coupled proton transport;cellular_component:GO:0000220//vacuolar proton-transporting V-type ATPase, V0 domain;molecular_function:GO:0016787//hydrolase activity;GO:0015078//hydrogen ion transmembrane transporter activity;
PAU026868.1	scaffold672	-	A3SS	113470-113643	113094-113231	113094-113197	gi|604298914|gb|EYU18884.1|/0/hypothetical protein MIMGU_mgv1a001442mg [Erythranthe guttata]	gi|225435194|ref|XM_002281973.1|/0.0/PREDICTED: Vitis vinifera vacuolar proton translocating ATPase 100 kDa subunit-like (LOC100250193), mRNA	sp|Q8RWZ7|VHAA1_ARATH/0.0/Vacuolar proton ATPase a1 OS=Arabidopsis thaliana GN=VHA-a1 PE=2 SV=1	vvi:100250193/0.0/vacuolar proton translocating ATPase 100 kDa subunit-like; K02154 V-type H+-transporting ATPase subunit I [EC:3.6.3.14]	SPAC16E8.07c/9e-140/---	PTHR11629:SF62/0.0/--	biological_process:GO:0015991//ATP hydrolysis coupled proton transport;cellular_component:GO:0000220//vacuolar proton-transporting V-type ATPase, V0 domain;molecular_function:GO:0016787//hydrolase activity;GO:0015078//hydrogen ion transmembrane transporter activity;
PAU026868.1	scaffold672	-	A3SS	113736-113849	113470-113643	113470-113659	gi|604298914|gb|EYU18884.1|/0/hypothetical protein MIMGU_mgv1a001442mg [Erythranthe guttata]	gi|225435194|ref|XM_002281973.1|/0.0/PREDICTED: Vitis vinifera vacuolar proton translocating ATPase 100 kDa subunit-like (LOC100250193), mRNA	sp|Q8RWZ7|VHAA1_ARATH/0.0/Vacuolar proton ATPase a1 OS=Arabidopsis thaliana GN=VHA-a1 PE=2 SV=1	vvi:100250193/0.0/vacuolar proton translocating ATPase 100 kDa subunit-like; K02154 V-type H+-transporting ATPase subunit I [EC:3.6.3.14]	SPAC16E8.07c/9e-140/---	PTHR11629:SF62/0.0/--	biological_process:GO:0015991//ATP hydrolysis coupled proton transport;cellular_component:GO:0000220//vacuolar proton-transporting V-type ATPase, V0 domain;molecular_function:GO:0016787//hydrolase activity;GO:0015078//hydrogen ion transmembrane transporter activity;
PAU027017.1	scaffold681	+	RetainedIntron	53345-53497	gi|604335809|gb|EYU39697.1|/0/hypothetical protein MIMGU_mgv1a024558mg, partial [Erythranthe guttata]	gi|110350028|gb|AC182571.2|/4e-85/Erythranthe guttata clone MGBa-65G3, complete sequence	-	-	-	-	-
PAU027017.1	scaffold681	+	RetainedIntron	54199-55520	gi|604335809|gb|EYU39697.1|/0/hypothetical protein MIMGU_mgv1a024558mg, partial [Erythranthe guttata]	gi|110350028|gb|AC182571.2|/4e-85/Erythranthe guttata clone MGBa-65G3, complete sequence	-	-	-	-	-
PAU027017.1	scaffold681	+	RetainedIntron	55592-63724	gi|604335809|gb|EYU39697.1|/0/hypothetical protein MIMGU_mgv1a024558mg, partial [Erythranthe guttata]	gi|110350028|gb|AC182571.2|/4e-85/Erythranthe guttata clone MGBa-65G3, complete sequence	-	-	-	-	-
PAU027017.1	scaffold681	+	RetainedIntron	63815-63971	gi|604335809|gb|EYU39697.1|/0/hypothetical protein MIMGU_mgv1a024558mg, partial [Erythranthe guttata]	gi|110350028|gb|AC182571.2|/4e-85/Erythranthe guttata clone MGBa-65G3, complete sequence	-	-	-	-	-
PAU027017.1	scaffold681	+	RetainedIntron	64377-65492	gi|604335809|gb|EYU39697.1|/0/hypothetical protein MIMGU_mgv1a024558mg, partial [Erythranthe guttata]	gi|110350028|gb|AC182571.2|/4e-85/Erythranthe guttata clone MGBa-65G3, complete sequence	-	-	-	-	-
PAU027017.1	scaffold681	+	A3SS	55521-55591	63725-63814	63736-63814	gi|604335809|gb|EYU39697.1|/0/hypothetical protein MIMGU_mgv1a024558mg, partial [Erythranthe guttata]	gi|110350028|gb|AC182571.2|/4e-85/Erythranthe guttata clone MGBa-65G3, complete sequence	-	-	-	-	-
PAU027017.1	scaffold681	+	A3SS	63725-63814	63972-64166	63981-64166	gi|604335809|gb|EYU39697.1|/0/hypothetical protein MIMGU_mgv1a024558mg, partial [Erythranthe guttata]	gi|110350028|gb|AC182571.2|/4e-85/Erythranthe guttata clone MGBa-65G3, complete sequence	-	-	-	-	-
PAU027017.1	scaffold681	+	A5SS	63972-64166	63725-63814	63725-63837	gi|604335809|gb|EYU39697.1|/0/hypothetical protein MIMGU_mgv1a024558mg, partial [Erythranthe guttata]	gi|110350028|gb|AC182571.2|/4e-85/Erythranthe guttata clone MGBa-65G3, complete sequence	-	-	-	-	-
PAU027533.1	scaffold72	-	RetainedIntron	751315-753089	gi|604300479|gb|EYU20297.1|/3.83882e-97/hypothetical protein MIMGU_mgv1a013416mg [Erythranthe guttata]	gi|359476277|ref|XM_002281423.2|/7e-32/PREDICTED: Vitis vinifera uncharacterized LOC100257849 (LOC100257849), mRNA	-	-	-	-	-
PAU028369.1	scaffold8	+	RetainedIntron	141542-141685	gi|604334550|gb|EYU38634.1|/8.63097e-50/hypothetical protein MIMGU_mgv1a015468mg [Erythranthe guttata]	gi|225315485|dbj|AK321638.1|/7e-25/Solanum lycopersicum cDNA, clone: LEFL1027AD02, HTC in leaf	sp|Q8LCY2|ISAM2_ARATH/1e-40/Iron-sulfur assembly protein IscA-like 2, mitochondrial OS=Arabidopsis thaliana GN=At5g03905 PE=2 SV=2	gmx:100811312/3e-10/iron-sulfur assembly protein IscA, chloroplastic-like; K13628 iron-sulfur cluster assembly protein	PA0665/2e-16/---	PF01521/3.8E-13/Iron-sulphur cluster biosynthesis	-
PAU029473.1	scaffold87	-	A3SS	512249-512333	509220-509303	509220-512132	gi|661899294|emb|CDO97288.1|/7.26177e-126/unnamed protein product [Coffea canephora]	gi|106879572|emb|AM111314.1|/3e-41/Plantago major partial mRNA for myb transcription factor (myb1 gene)	sp|Q8VWK4|TRB1_ARATH/2e-103/Telomere repeat-binding factor 1 OS=Arabidopsis thaliana GN=TRB1 PE=1 SV=1	vvi:100261713/3e-112/uncharacterized LOC100261713; K09422 myb proto-oncogene protein, plant	-	PF00249/3.1E-9/Myb-like DNA-binding domain	-
PAU029473.1	scaffold87	-	A3SS	512249-512333	509220-509303	509220-510761	gi|661899294|emb|CDO97288.1|/7.26177e-126/unnamed protein product [Coffea canephora]	gi|106879572|emb|AM111314.1|/3e-41/Plantago major partial mRNA for myb transcription factor (myb1 gene)	sp|Q8VWK4|TRB1_ARATH/2e-103/Telomere repeat-binding factor 1 OS=Arabidopsis thaliana GN=TRB1 PE=1 SV=1	vvi:100261713/3e-112/uncharacterized LOC100261713; K09422 myb proto-oncogene protein, plant	-	PF00249/3.1E-9/Myb-like DNA-binding domain	-
PAU029473.1	scaffold87	-	A5SS	509220-509303	512249-512333	510701-512333	gi|661899294|emb|CDO97288.1|/7.26177e-126/unnamed protein product [Coffea canephora]	gi|106879572|emb|AM111314.1|/3e-41/Plantago major partial mRNA for myb transcription factor (myb1 gene)	sp|Q8VWK4|TRB1_ARATH/2e-103/Telomere repeat-binding factor 1 OS=Arabidopsis thaliana GN=TRB1 PE=1 SV=1	vvi:100261713/3e-112/uncharacterized LOC100261713; K09422 myb proto-oncogene protein, plant	-	PF00249/3.1E-9/Myb-like DNA-binding domain	-
PAU029473.1	scaffold87	-	RetainedIntron	509082-509219	gi|661899294|emb|CDO97288.1|/7.26177e-126/unnamed protein product [Coffea canephora]	gi|106879572|emb|AM111314.1|/3e-41/Plantago major partial mRNA for myb transcription factor (myb1 gene)	sp|Q8VWK4|TRB1_ARATH/2e-103/Telomere repeat-binding factor 1 OS=Arabidopsis thaliana GN=TRB1 PE=1 SV=1	vvi:100261713/3e-112/uncharacterized LOC100261713; K09422 myb proto-oncogene protein, plant	-	PF00249/3.1E-9/Myb-like DNA-binding domain	-
PAU029473.1	scaffold87	-	RetainedIntron	509304-512248	gi|661899294|emb|CDO97288.1|/7.26177e-126/unnamed protein product [Coffea canephora]	gi|106879572|emb|AM111314.1|/3e-41/Plantago major partial mRNA for myb transcription factor (myb1 gene)	sp|Q8VWK4|TRB1_ARATH/2e-103/Telomere repeat-binding factor 1 OS=Arabidopsis thaliana GN=TRB1 PE=1 SV=1	vvi:100261713/3e-112/uncharacterized LOC100261713; K09422 myb proto-oncogene protein, plant	-	PF00249/3.1E-9/Myb-like DNA-binding domain	-
PAU029473.1	scaffold87	-	RetainedIntron	512334-512795	gi|661899294|emb|CDO97288.1|/7.26177e-126/unnamed protein product [Coffea canephora]	gi|106879572|emb|AM111314.1|/3e-41/Plantago major partial mRNA for myb transcription factor (myb1 gene)	sp|Q8VWK4|TRB1_ARATH/2e-103/Telomere repeat-binding factor 1 OS=Arabidopsis thaliana GN=TRB1 PE=1 SV=1	vvi:100261713/3e-112/uncharacterized LOC100261713; K09422 myb proto-oncogene protein, plant	-	PF00249/3.1E-9/Myb-like DNA-binding domain	-
PAU029473.1	scaffold87	-	RetainedIntron	513014-513098	gi|661899294|emb|CDO97288.1|/7.26177e-126/unnamed protein product [Coffea canephora]	gi|106879572|emb|AM111314.1|/3e-41/Plantago major partial mRNA for myb transcription factor (myb1 gene)	sp|Q8VWK4|TRB1_ARATH/2e-103/Telomere repeat-binding factor 1 OS=Arabidopsis thaliana GN=TRB1 PE=1 SV=1	vvi:100261713/3e-112/uncharacterized LOC100261713; K09422 myb proto-oncogene protein, plant	-	PF00249/3.1E-9/Myb-like DNA-binding domain	-
PAU029473.1	scaffold87	-	A5SS	512249-512333	512796-513013	512839-513013	gi|661899294|emb|CDO97288.1|/7.26177e-126/unnamed protein product [Coffea canephora]	gi|106879572|emb|AM111314.1|/3e-41/Plantago major partial mRNA for myb transcription factor (myb1 gene)	sp|Q8VWK4|TRB1_ARATH/2e-103/Telomere repeat-binding factor 1 OS=Arabidopsis thaliana GN=TRB1 PE=1 SV=1	vvi:100261713/3e-112/uncharacterized LOC100261713; K09422 myb proto-oncogene protein, plant	-	PF00249/3.1E-9/Myb-like DNA-binding domain	-
PAU029473.1	scaffold87	-	SkippedExon	509220-509303	512249-512333	512796-513013	gi|661899294|emb|CDO97288.1|/7.26177e-126/unnamed protein product [Coffea canephora]	gi|106879572|emb|AM111314.1|/3e-41/Plantago major partial mRNA for myb transcription factor (myb1 gene)	sp|Q8VWK4|TRB1_ARATH/2e-103/Telomere repeat-binding factor 1 OS=Arabidopsis thaliana GN=TRB1 PE=1 SV=1	vvi:100261713/3e-112/uncharacterized LOC100261713; K09422 myb proto-oncogene protein, plant	-	PF00249/3.1E-9/Myb-like DNA-binding domain	-
PAU030945.1	scaffold99	-	A3SS	130354-130437	125813-125879	125813-128799	gi|604334801|gb|EYU38867.1|/3.4587e-46/hypothetical protein MIMGU_mgv1a016071mg [Erythranthe guttata]	gi|225322193|dbj|AK326209.1|/4e-16/Solanum lycopersicum cDNA, clone: LEFL2003BA03, HTC in fruit	sp|Q9ZNV4|CYB5C_ARATH/2e-38/Cytochrome B5 isoform C OS=Arabidopsis thaliana GN=CYTB5-C PE=1 SV=1	ota:Ot10g00920/7e-14/Nia, nitrate reductase apoenzyme (IC); K00360 nitrate reductase (NADH) [EC:1.7.1.1]	YNL111c/3e-22/---	PS50255/28.307/Cytochrome b5 family, heme-binding domain profile.	-
PAU030945.1	scaffold99	-	RetainedIntron	136218-136304	gi|604334801|gb|EYU38867.1|/3.4587e-46/hypothetical protein MIMGU_mgv1a016071mg [Erythranthe guttata]	gi|225322193|dbj|AK326209.1|/4e-16/Solanum lycopersicum cDNA, clone: LEFL2003BA03, HTC in fruit	sp|Q9ZNV4|CYB5C_ARATH/2e-38/Cytochrome B5 isoform C OS=Arabidopsis thaliana GN=CYTB5-C PE=1 SV=1	ota:Ot10g00920/7e-14/Nia, nitrate reductase apoenzyme (IC); K00360 nitrate reductase (NADH) [EC:1.7.1.1]	YNL111c/3e-22/---	PS50255/28.307/Cytochrome b5 family, heme-binding domain profile.	-
